# Supplementary material for: Classical Ideal Curves of Fluid Mixtures and their Role for the Development of Equations of State
Source: Research Square preprint supplement (doi:10.21203/rs.3.rs-8775172/v1), 2026-02-09
Supplement: Supplementary file 1 [file 8a7abda292e7f41e95968365.docx]

Supplementary Material for
“Classical Ideal Curves of Fluid Mixtures and their Role for the Development of Equations of State”

International Journal of Thermophysics

Jessica Buchenfeld1 ∙ Monika Thol1 ∙ Roland Span1

1Chair of Thermodynamics, Faculty of Mechanical Engineering, Ruhr University Bochum, Bochum, 44801, Germany

E-Mail: Jessica.Buchenfeld@thermo.ruhr-uni-bochum.de

## Classical Ideal Curves: reduced *p*,*T*-diagrams


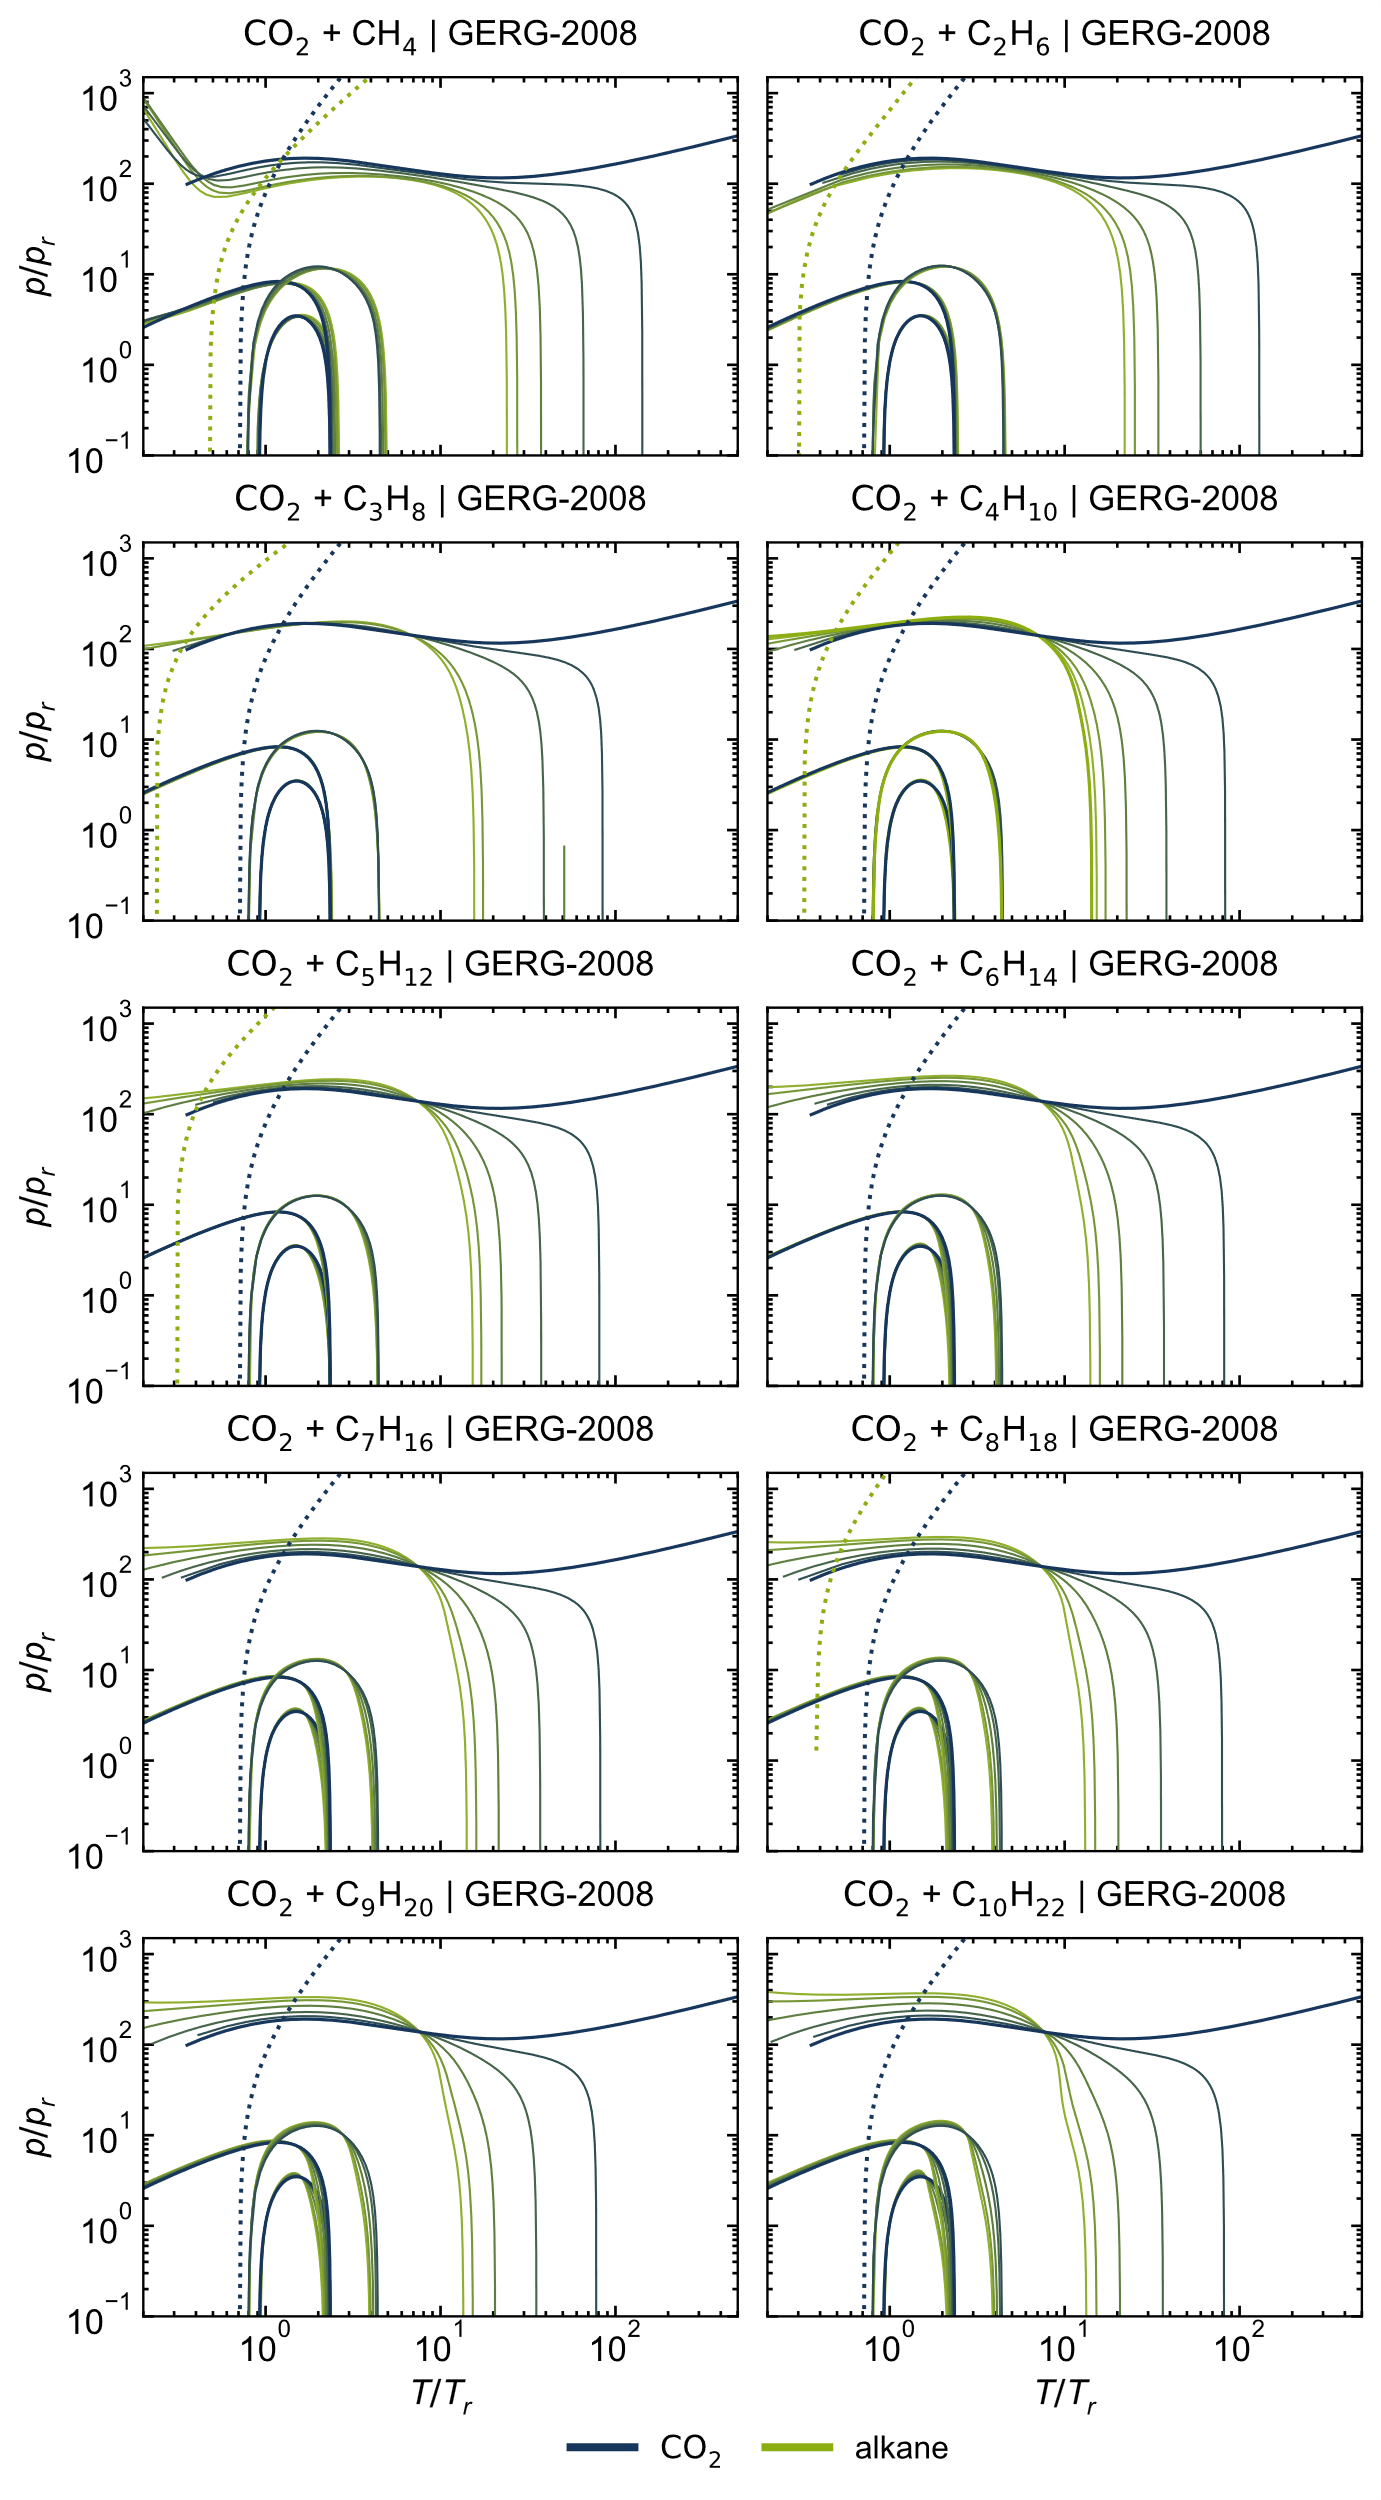


Figure S 1: Ideal curves of all considered CO2 + alkane mixtures, calculated with the GERG-2008 model [1].


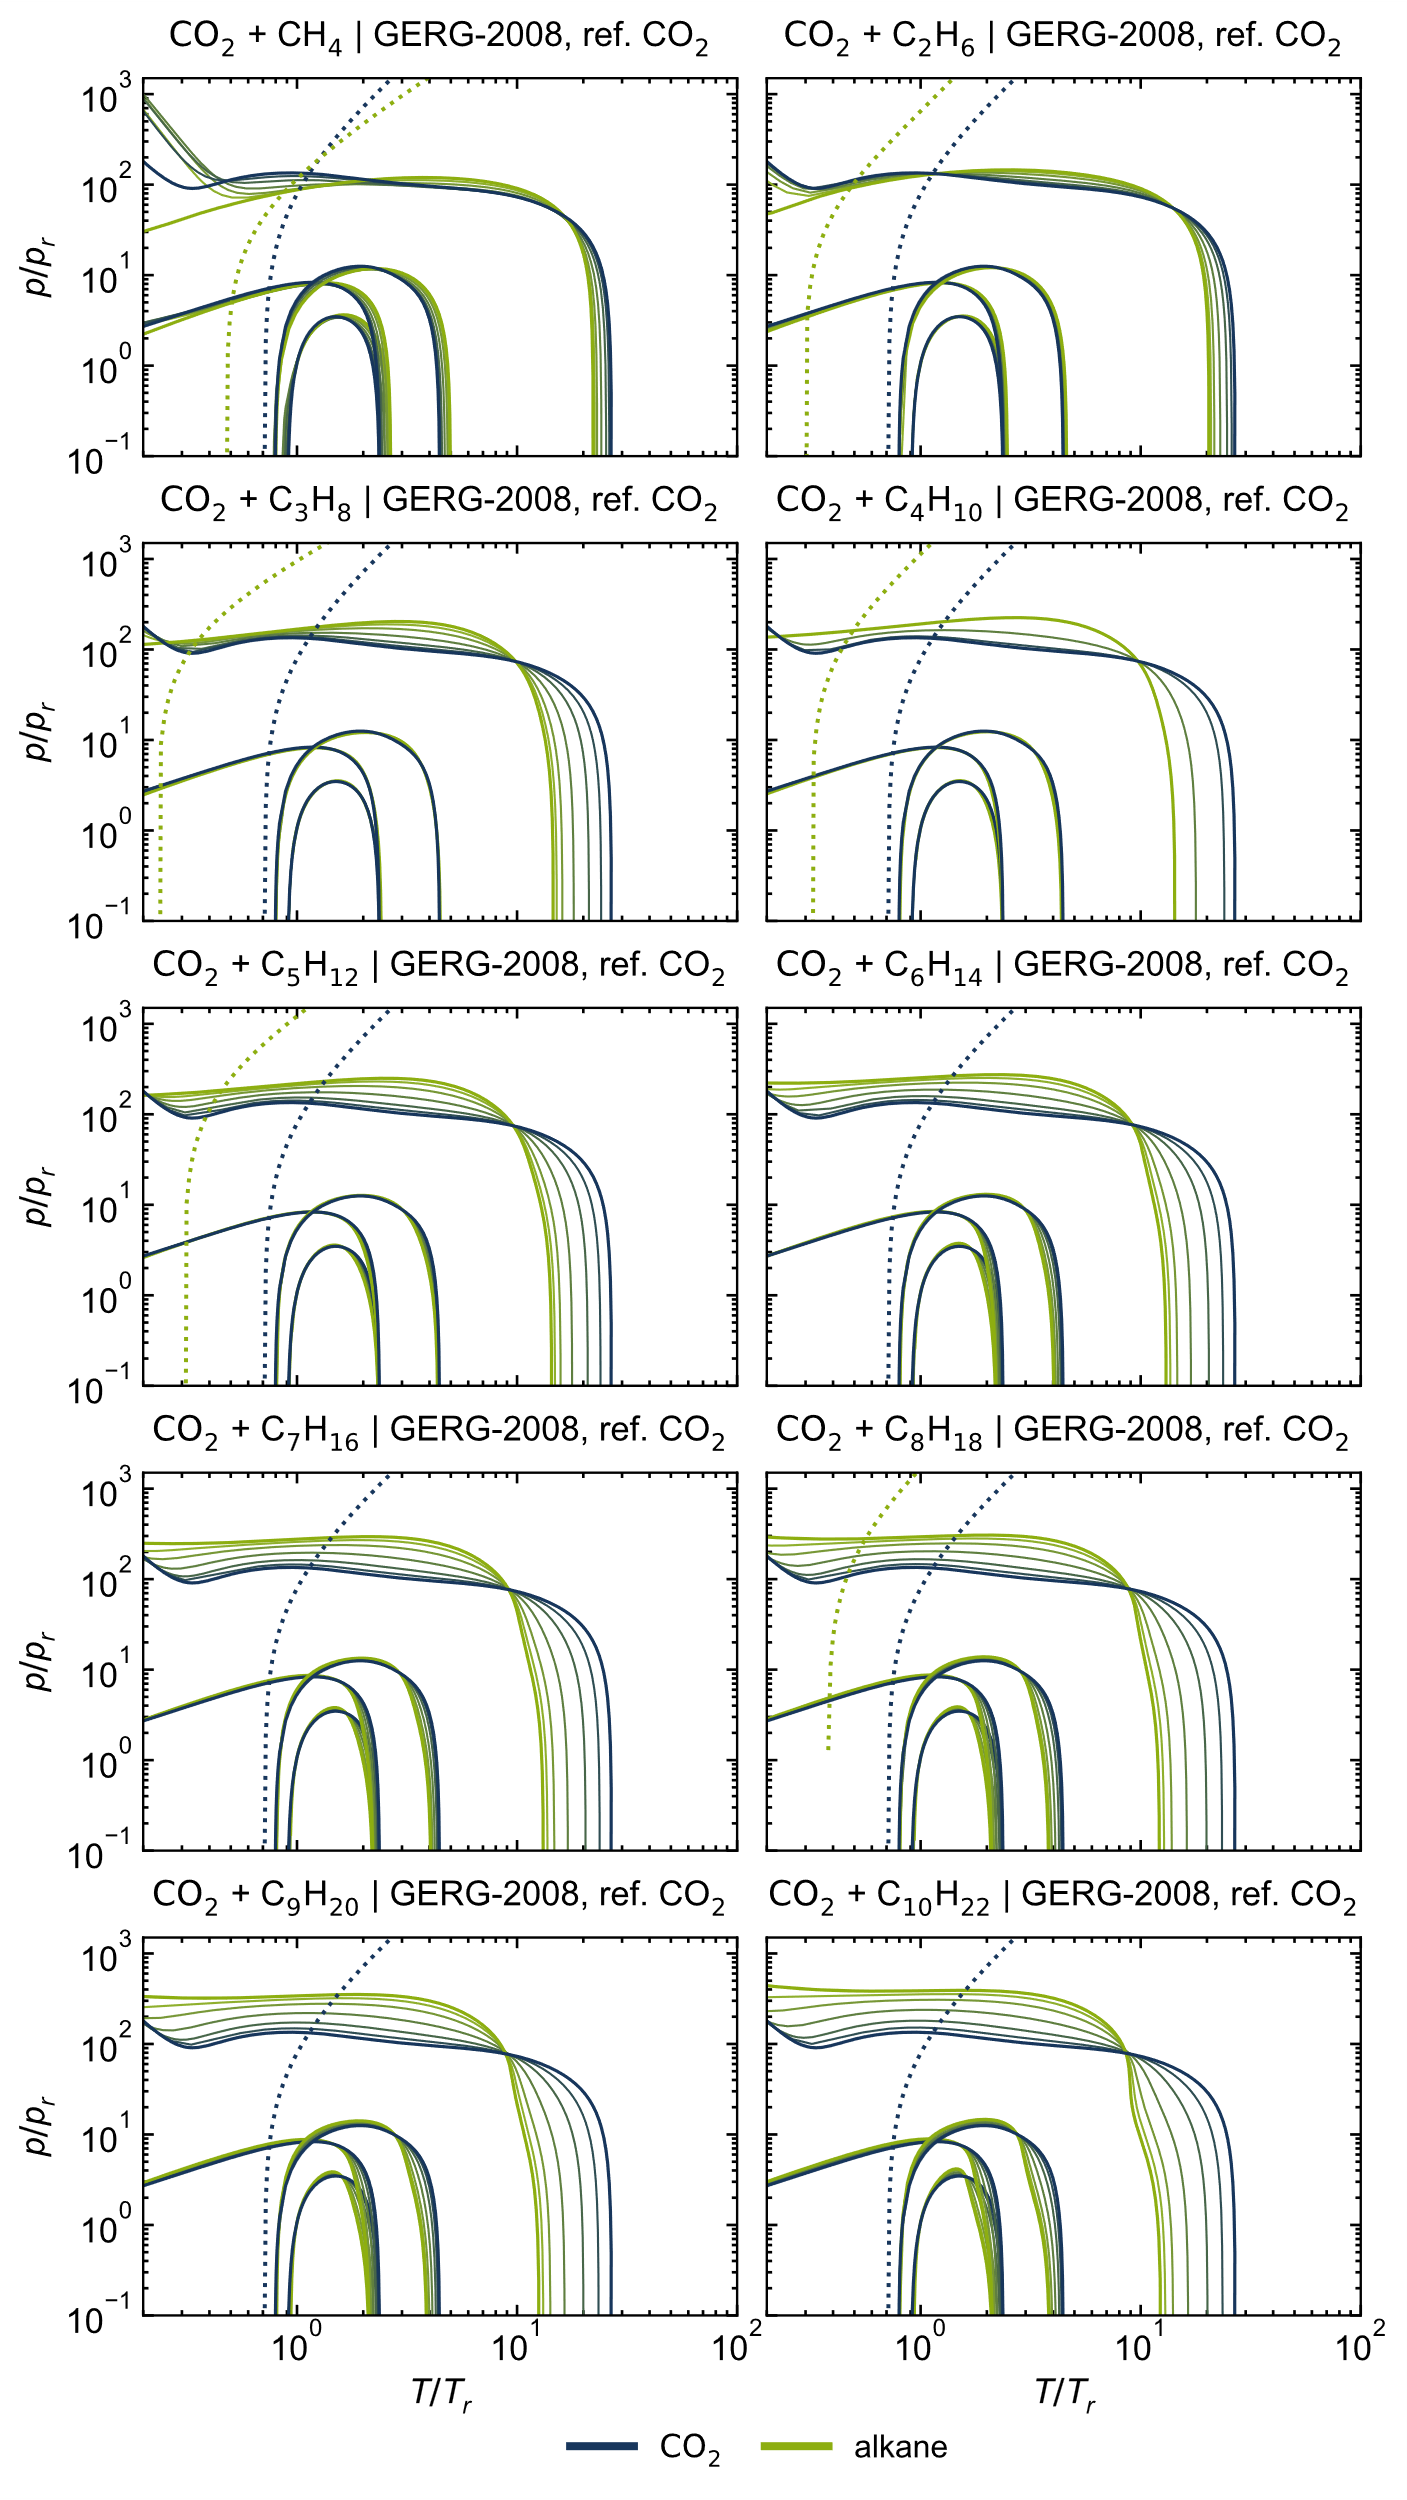


Figure S 2: Ideal curves of all considered CO2 + alkane mixtures, calculated with the GERG-2008 model [1] and the reference EOS for CO2 [2].


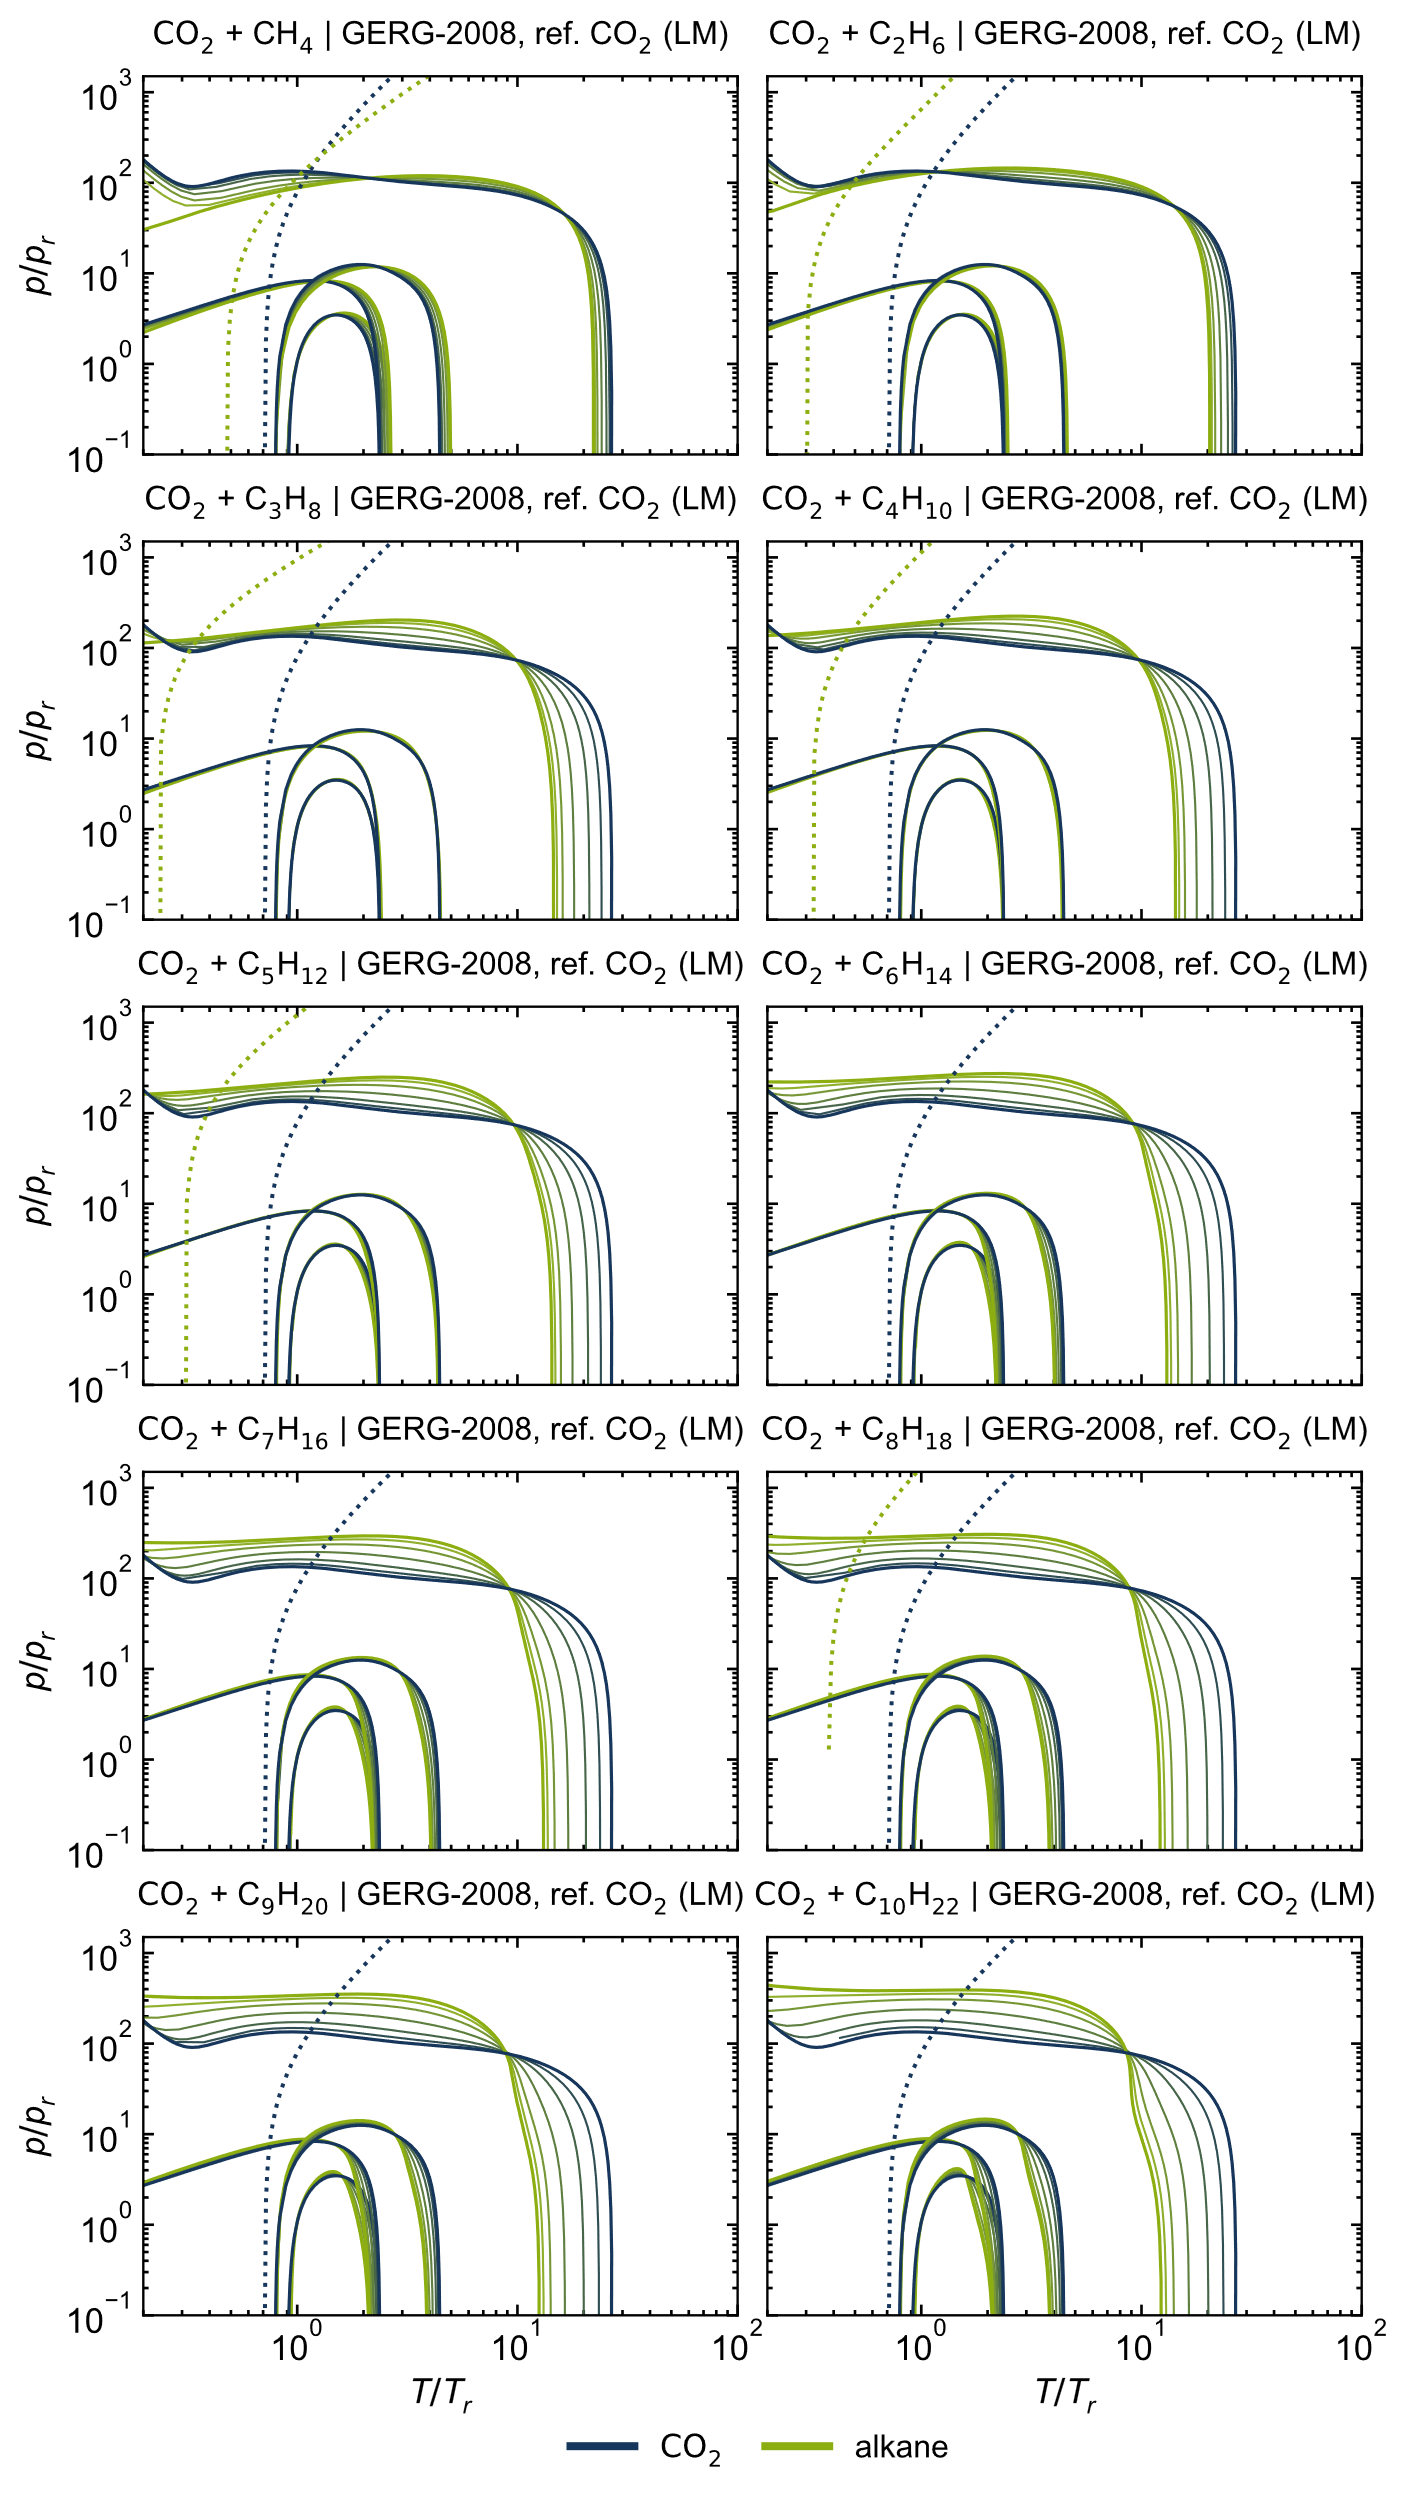


Figure S 3: Ideal curves of all considered CO2 + alkane mixtures, calculated with the GERG-2008 model [1] and the reference EOS for CO2 [2] using the linear mixing rule (LM).


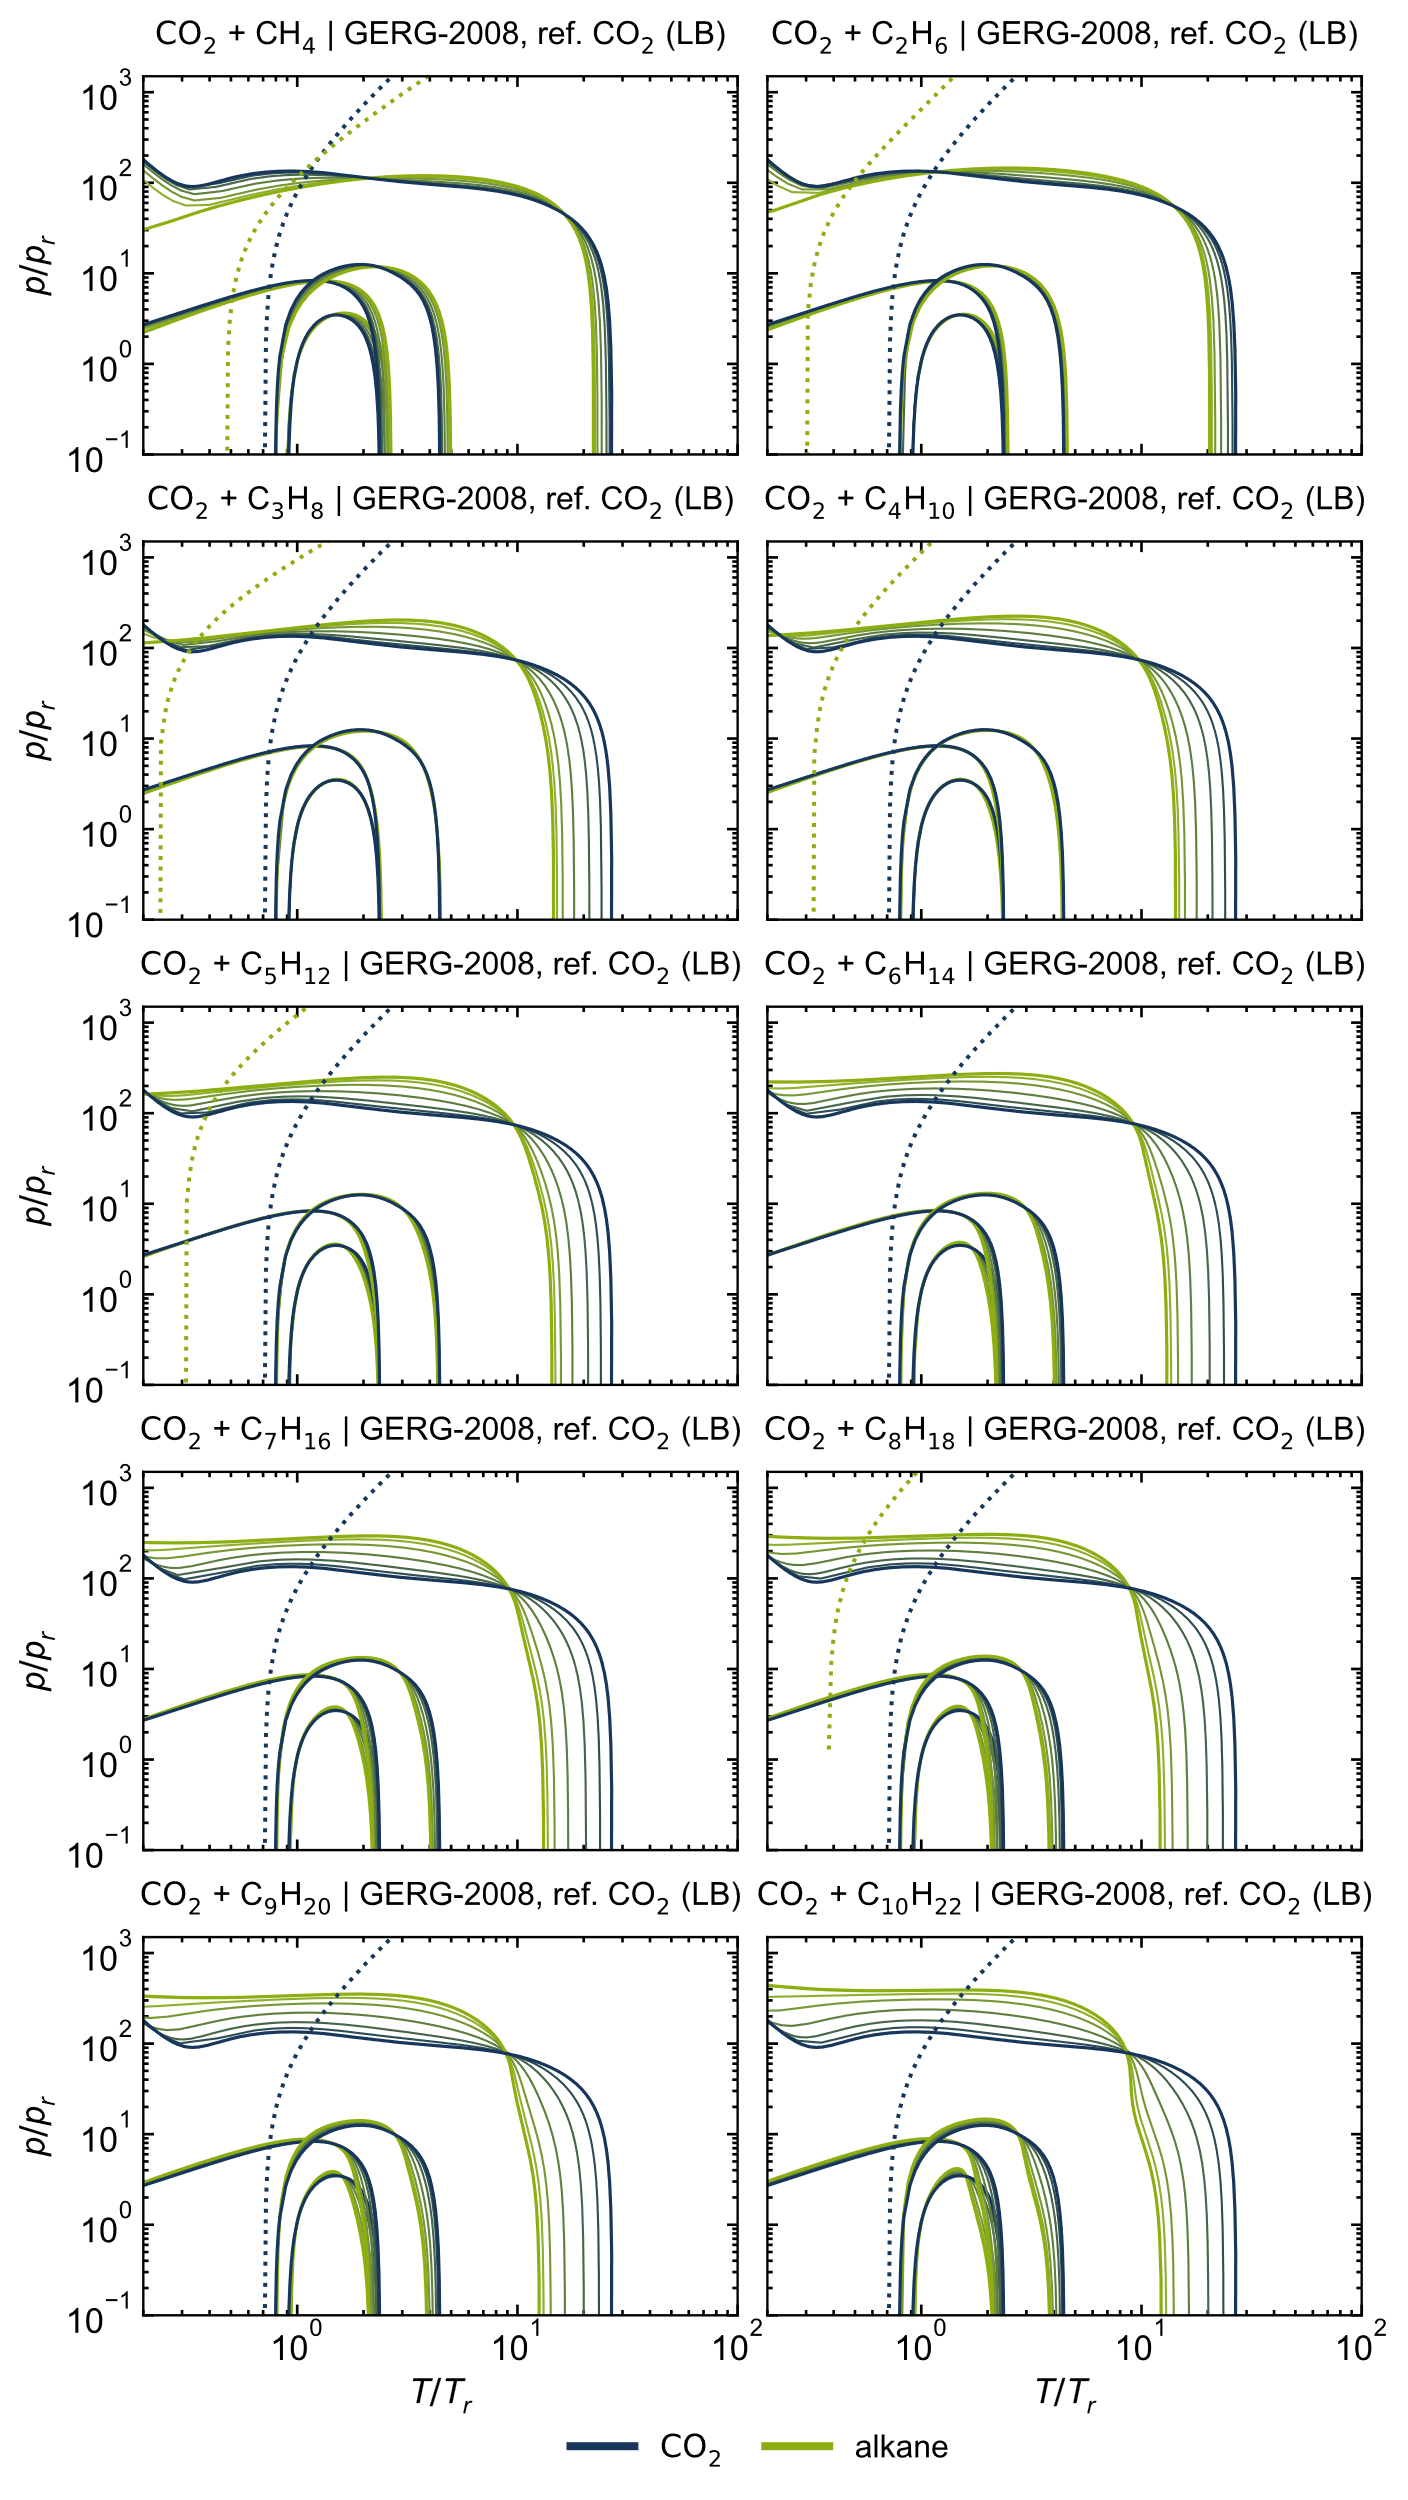


Figure S 4: Ideal curves of all considered CO2 + alkane mixtures, calculated with the GERG-2008 model [1] and the reference EOS for CO2 [2] using the Lorentz-Berthelot mixing rule (LB).


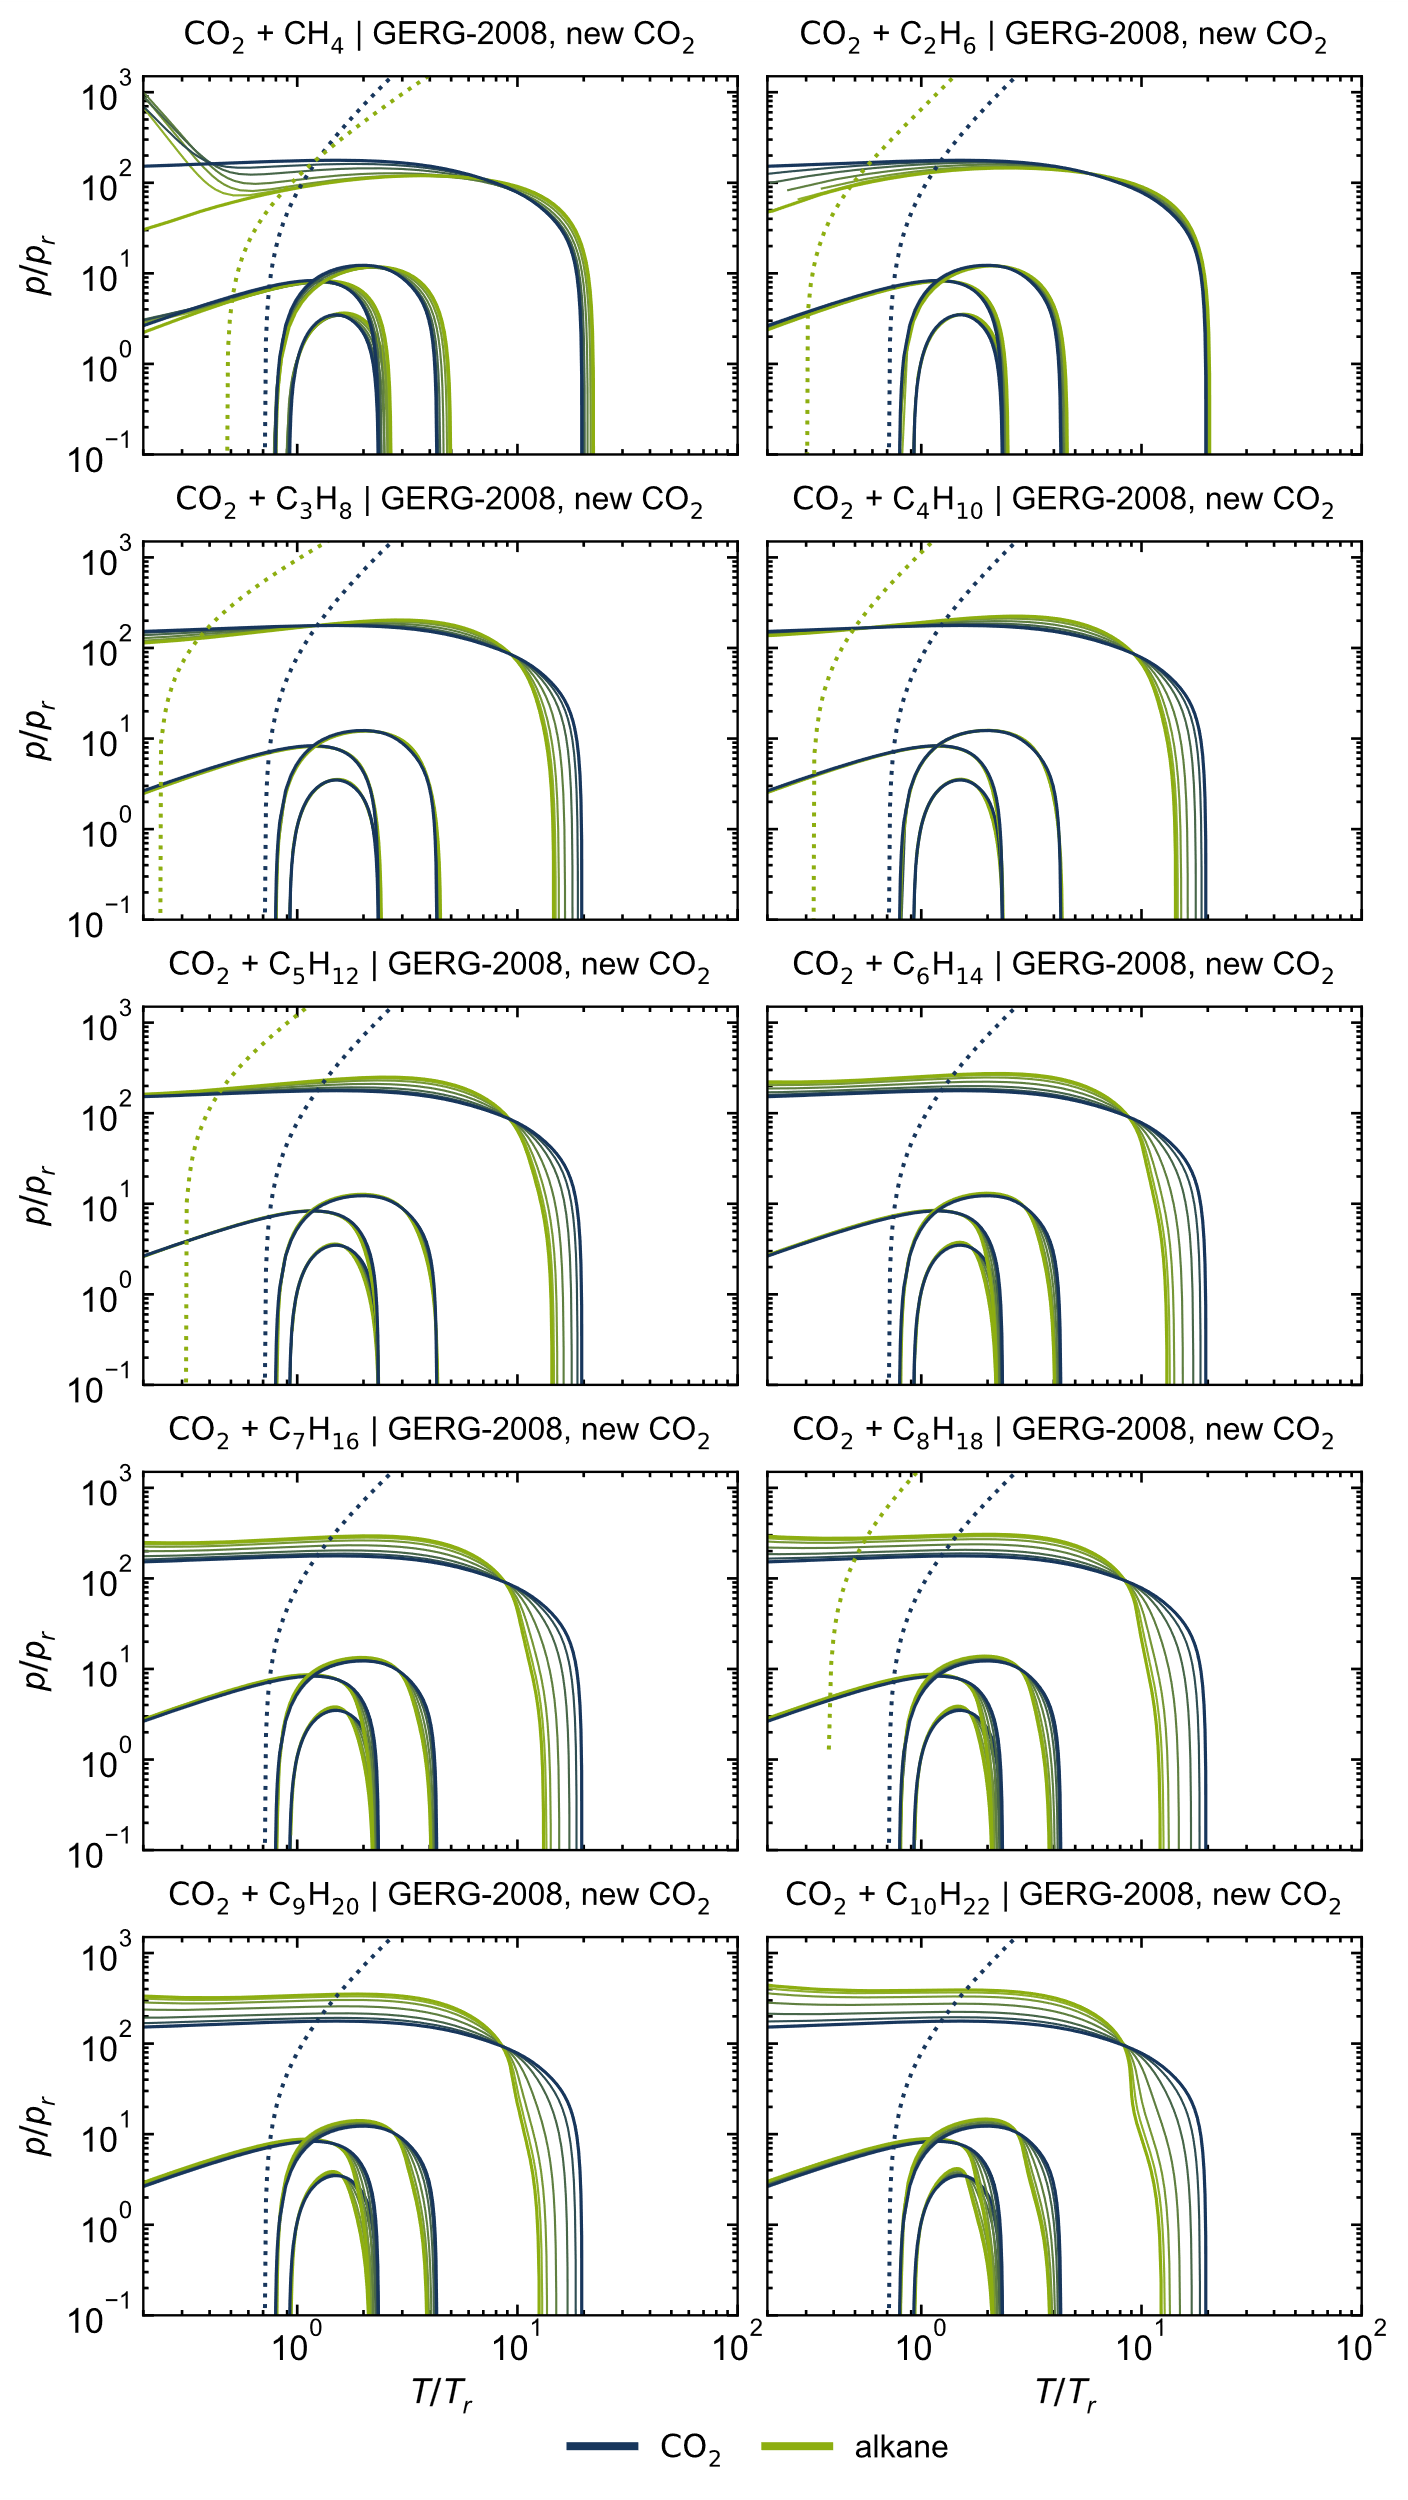


Figure S 5: Ideal curves of all considered CO2 + alkane mixtures, calculated with the GERG-2008 model [1] and the new preliminary EOS for CO2 [3].


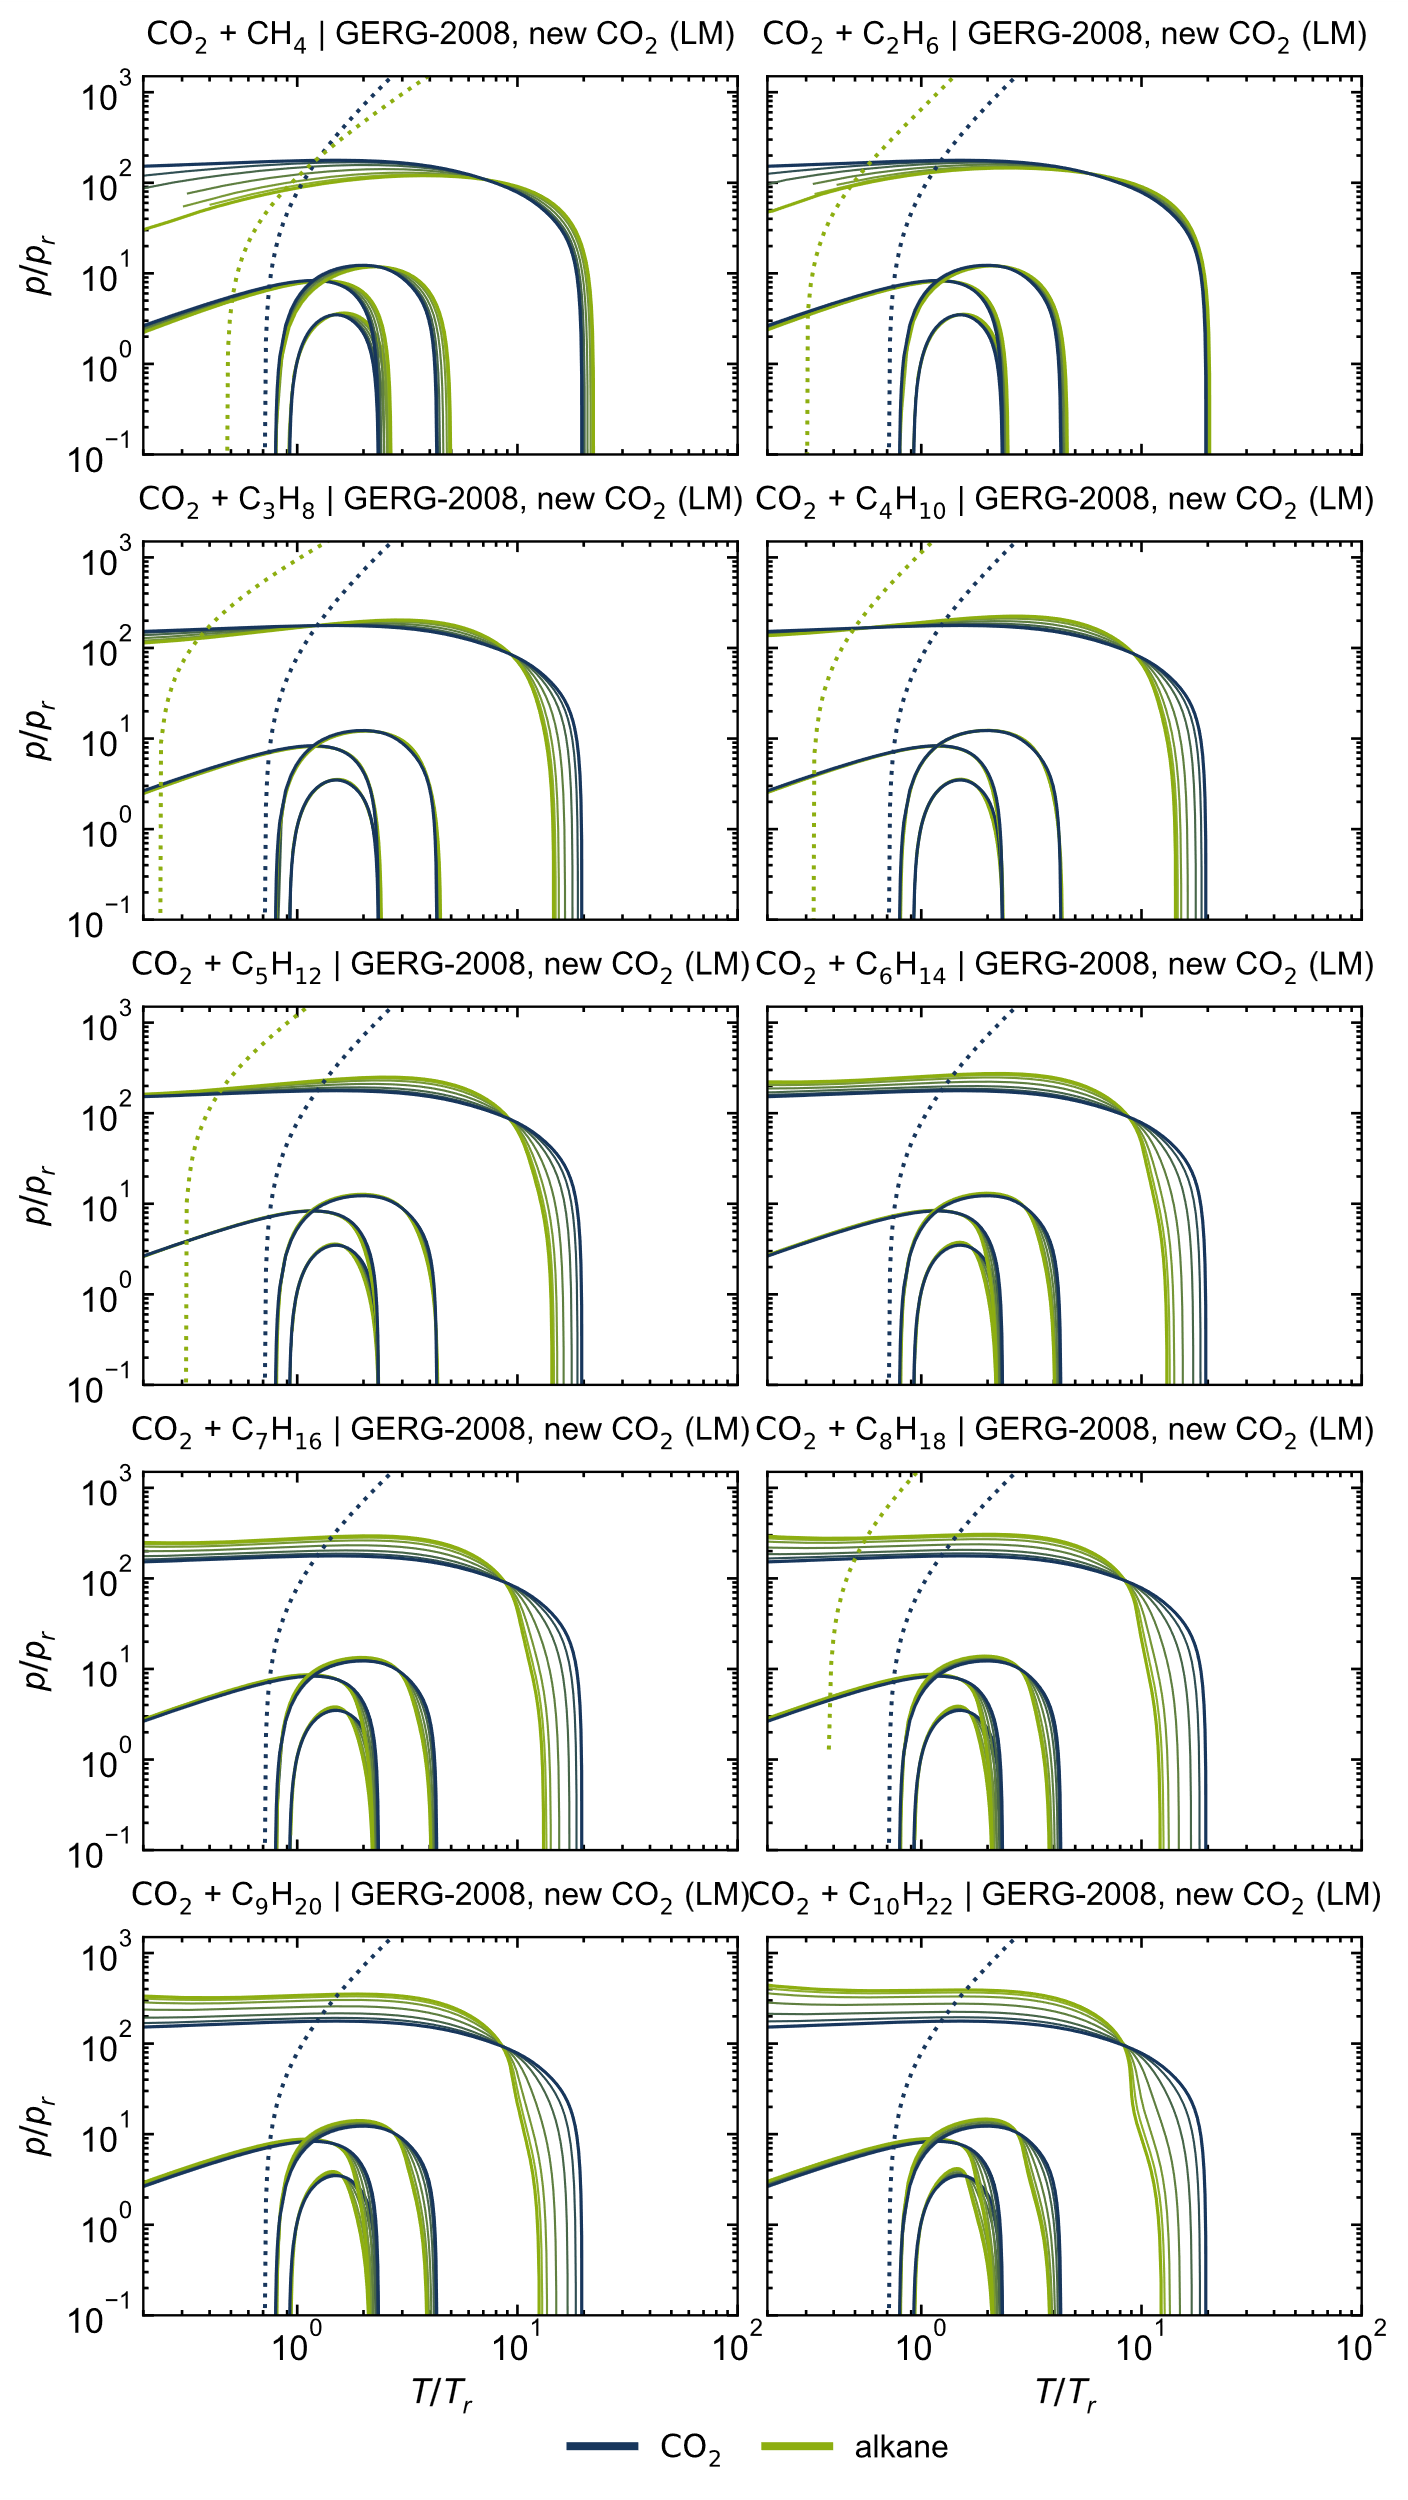


Figure S 6: Ideal curves of all considered CO2 + alkane mixtures, calculated with the GERG-2008 model [1] and the new preliminary EOS for CO2 [3] using the linear mixing rule (LM).


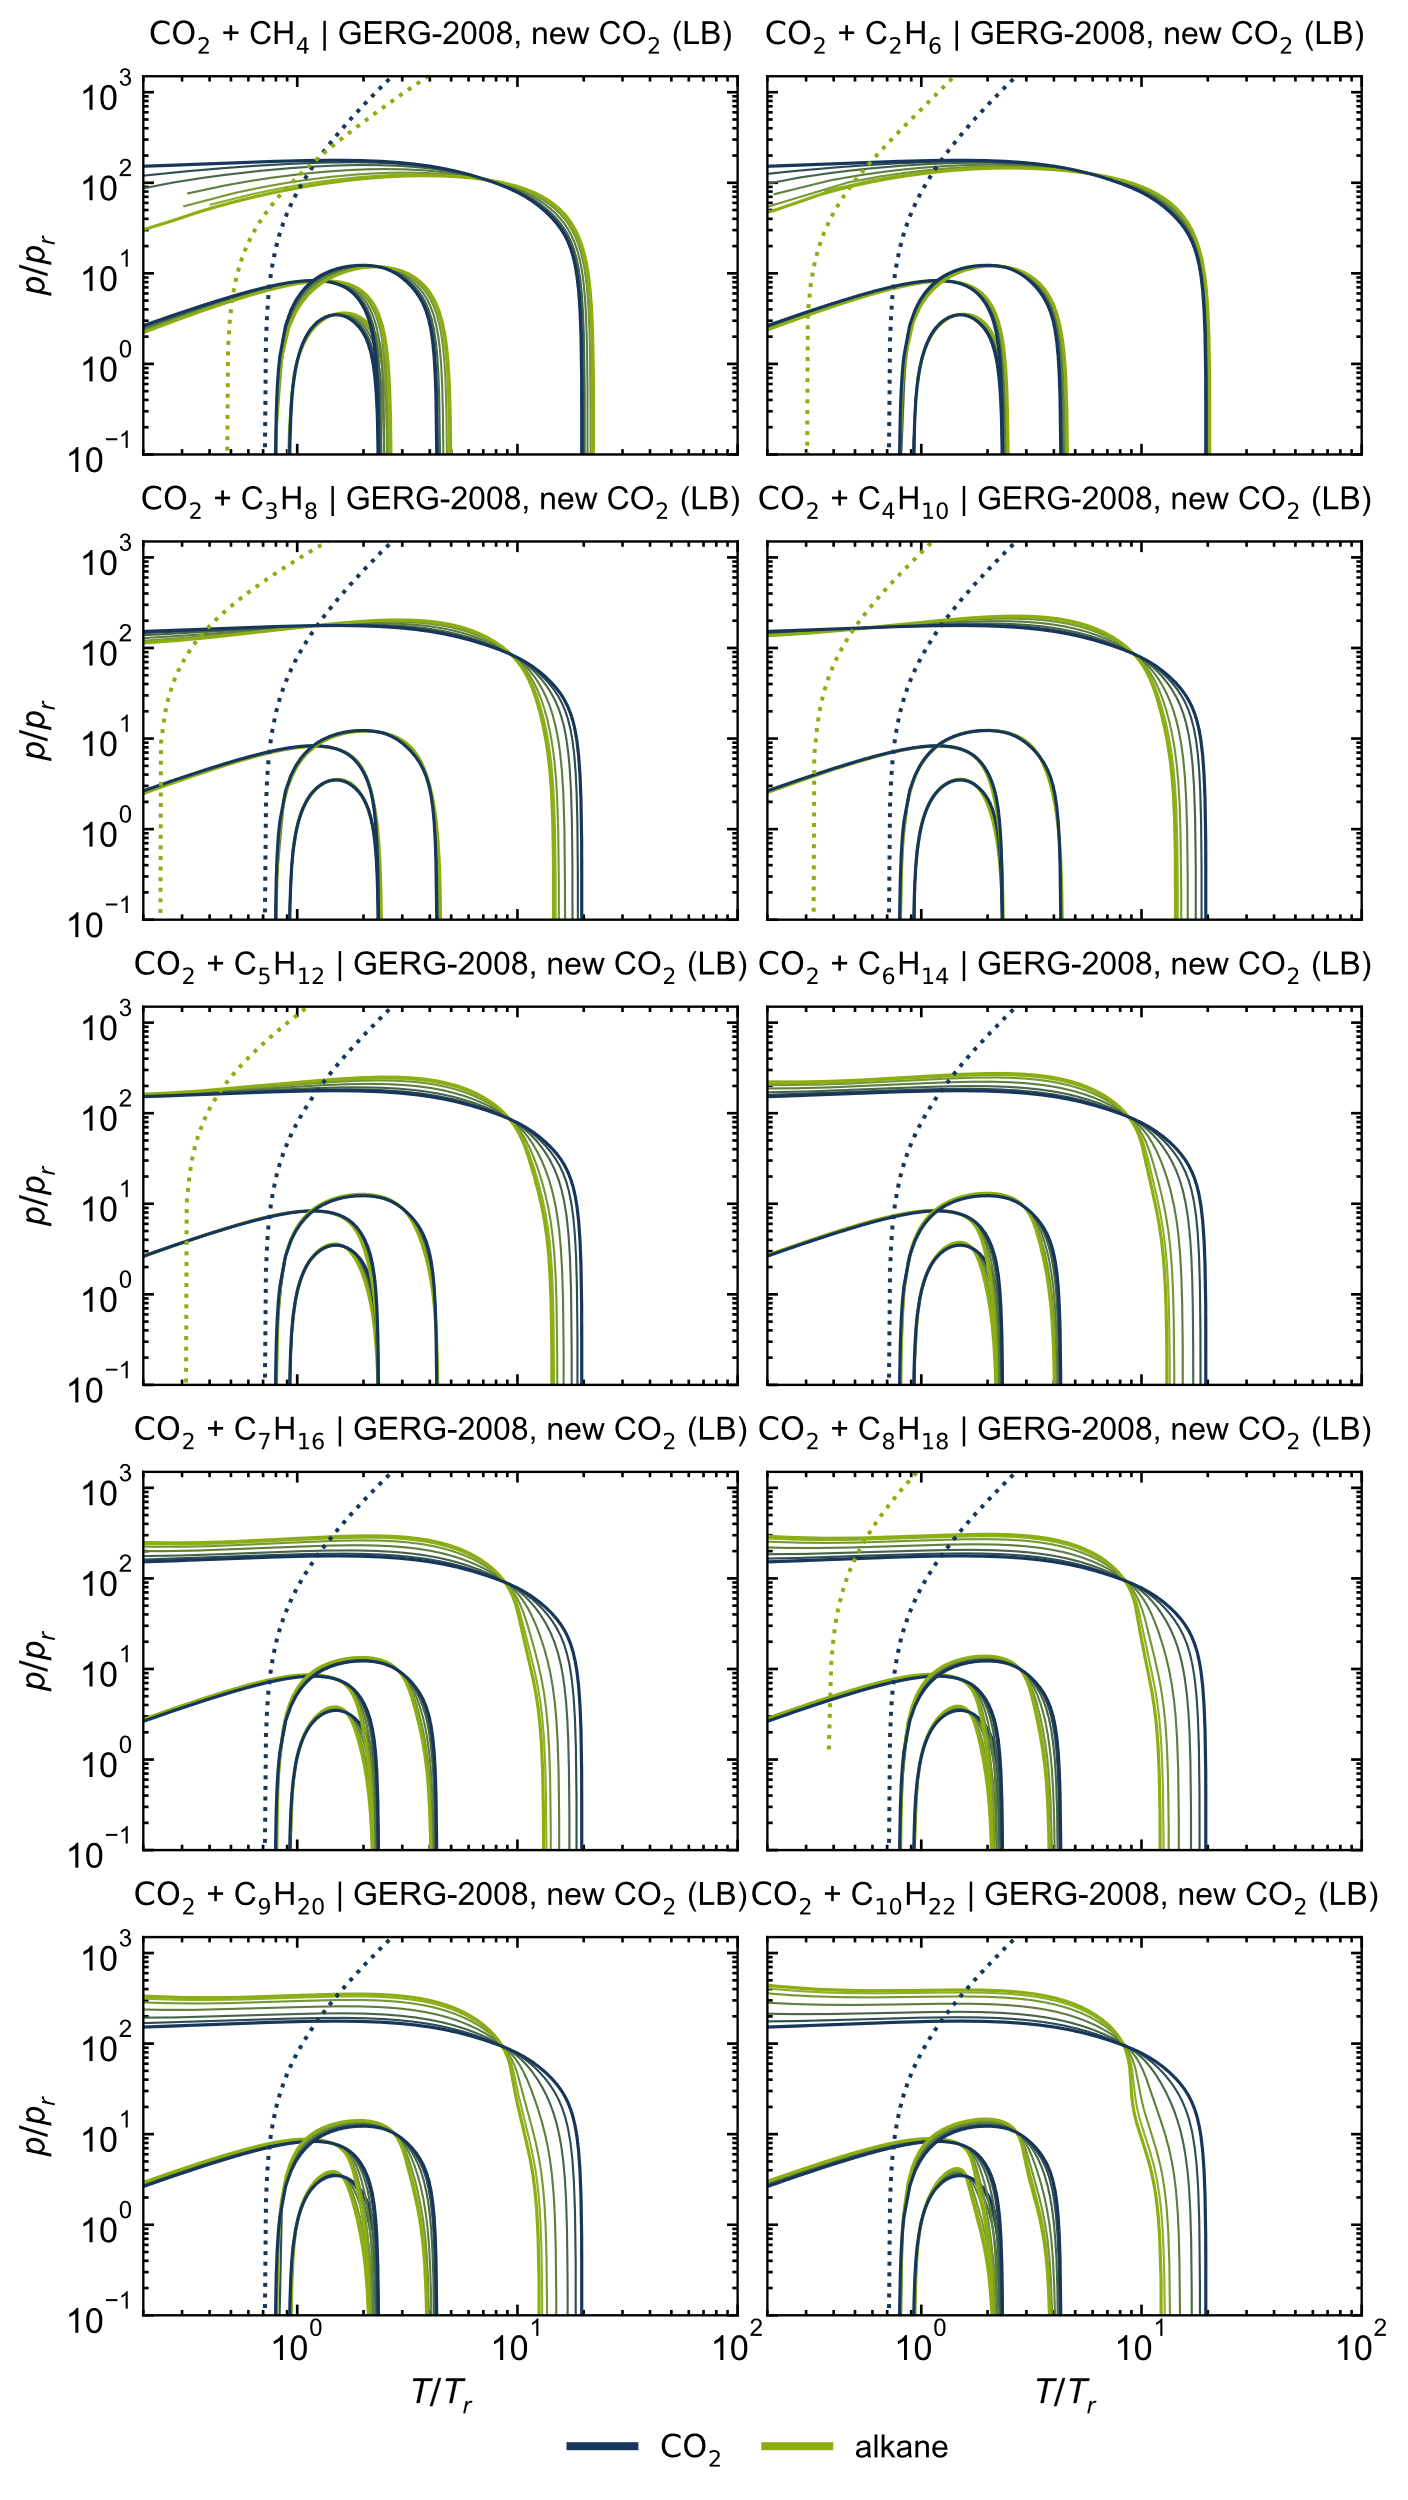


Figure S 7: Ideal curves of all considered CO2 + alkane mixtures, calculated with the GERG-2008 model [1] and the new preliminary EOS for CO2 [3] using the Lorentz-Berthelot mixing rule (LB).


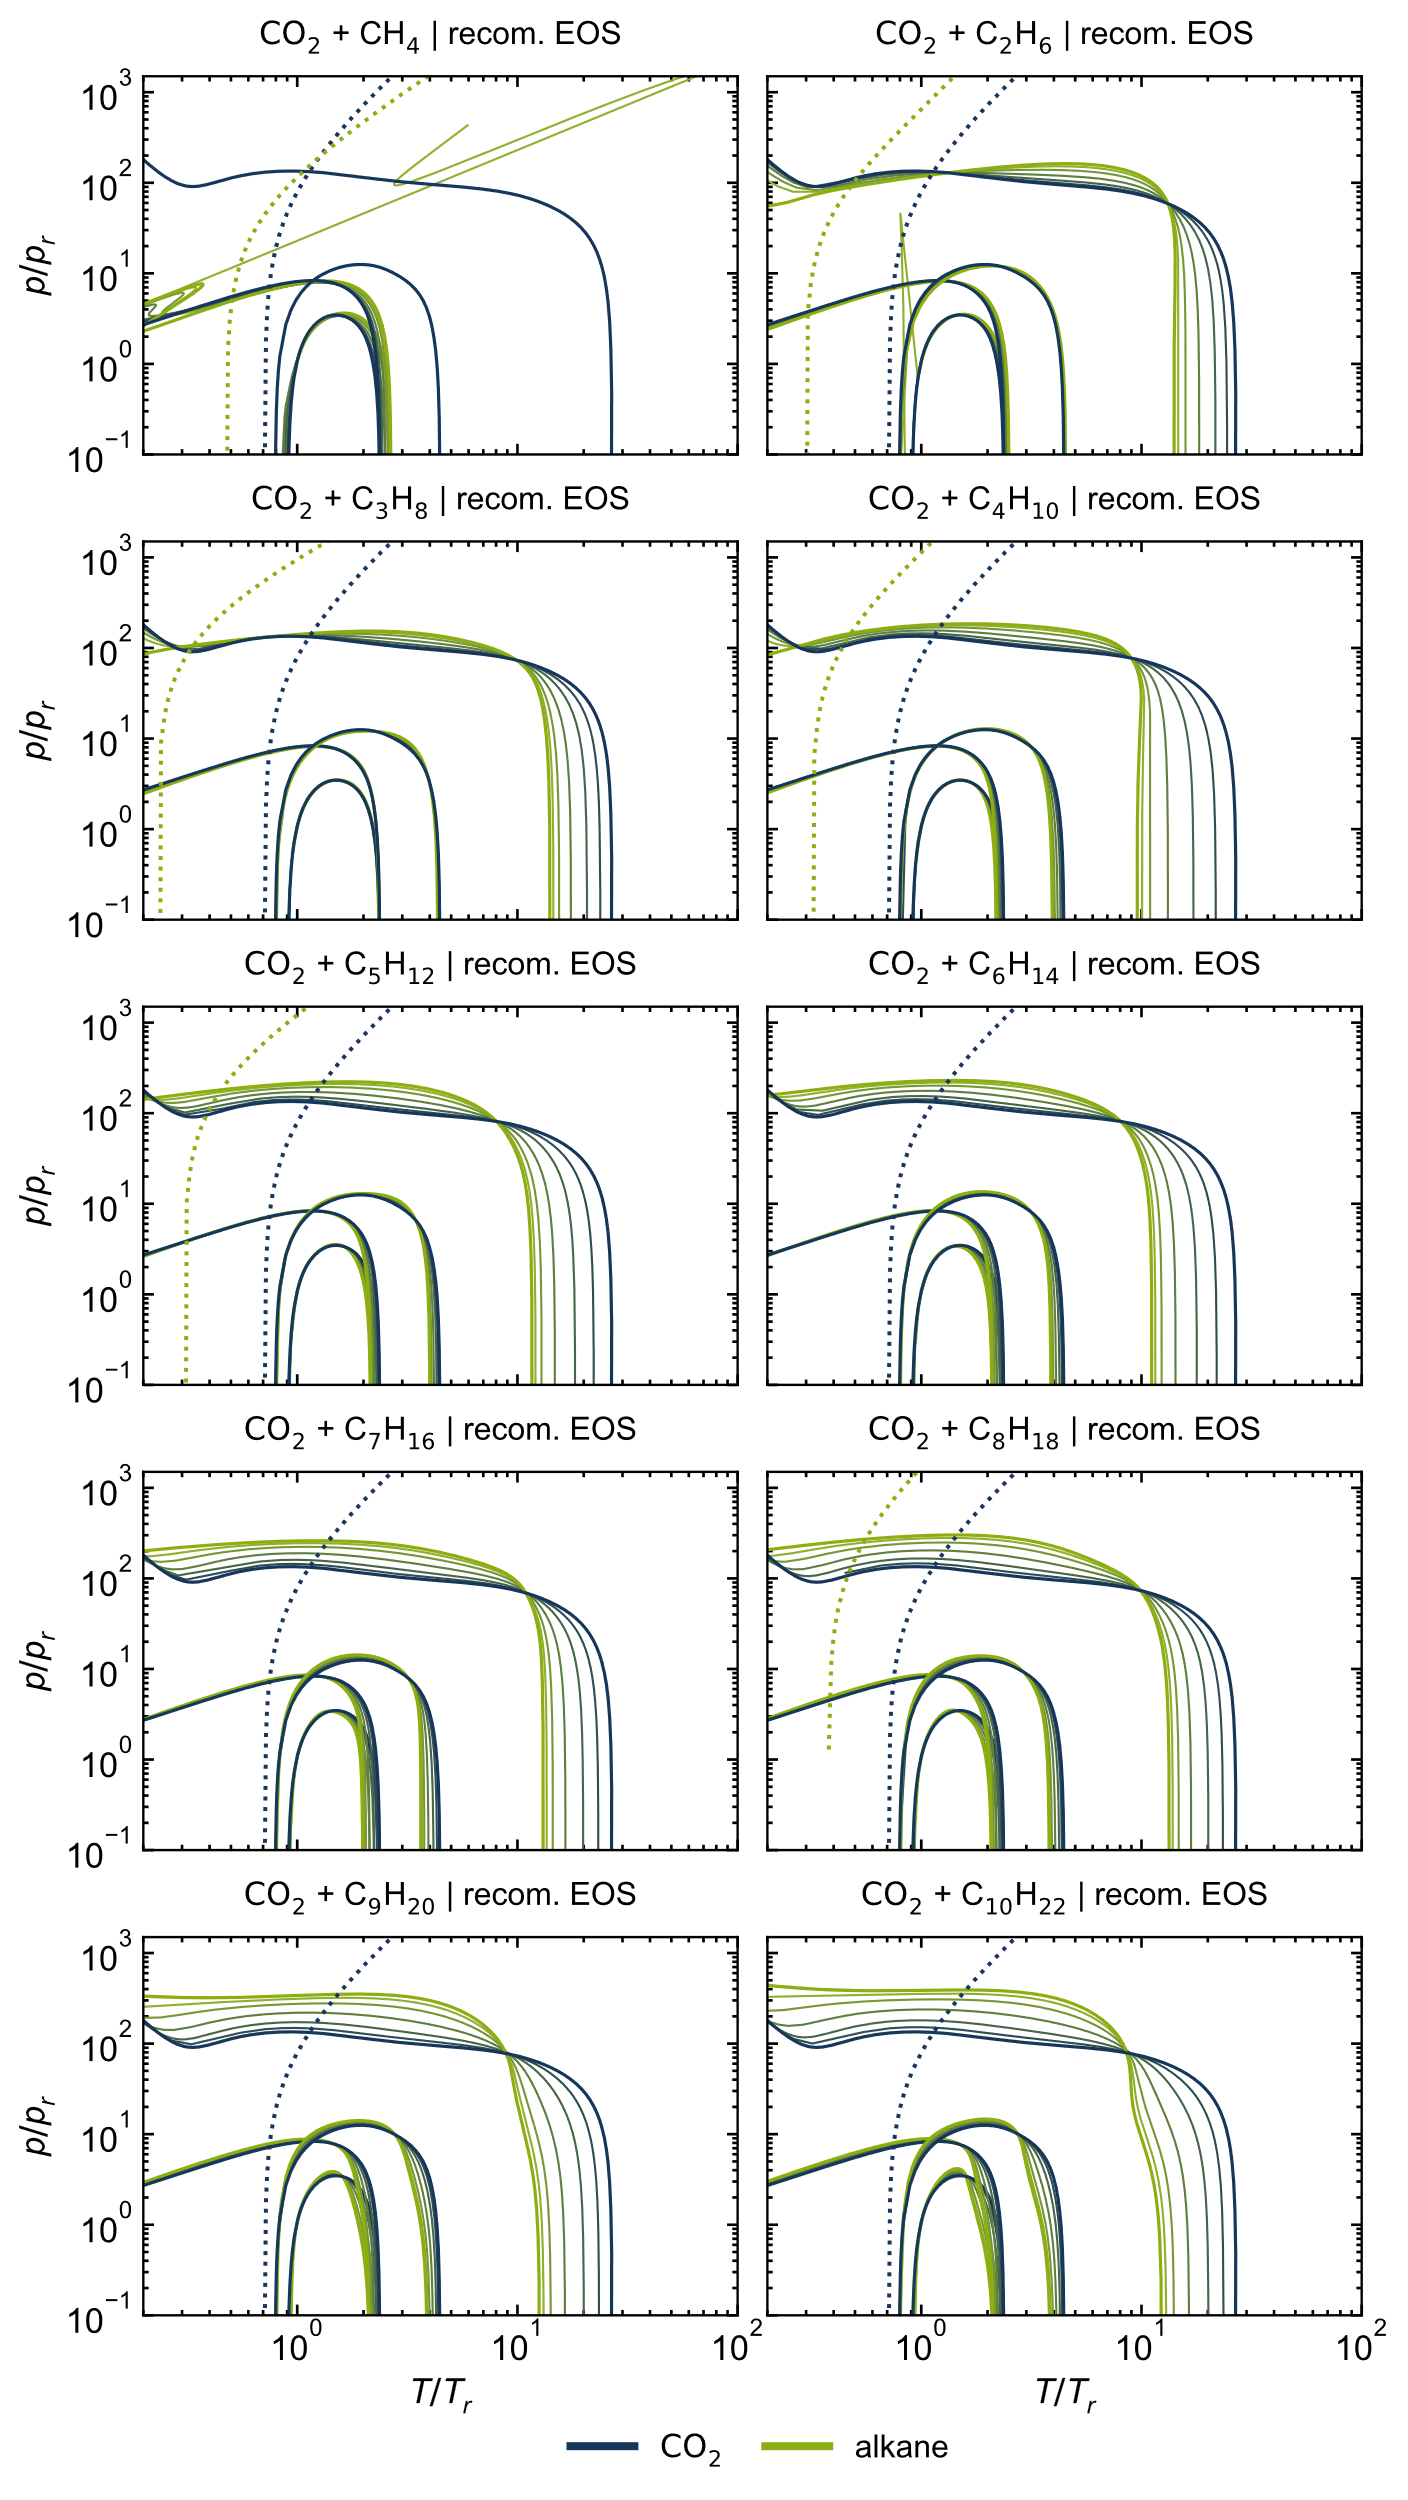


Figure S 8: Ideal curves of all considered CO2 + alkane mixtures, calculated with the recommended EOS [2, 4–12].


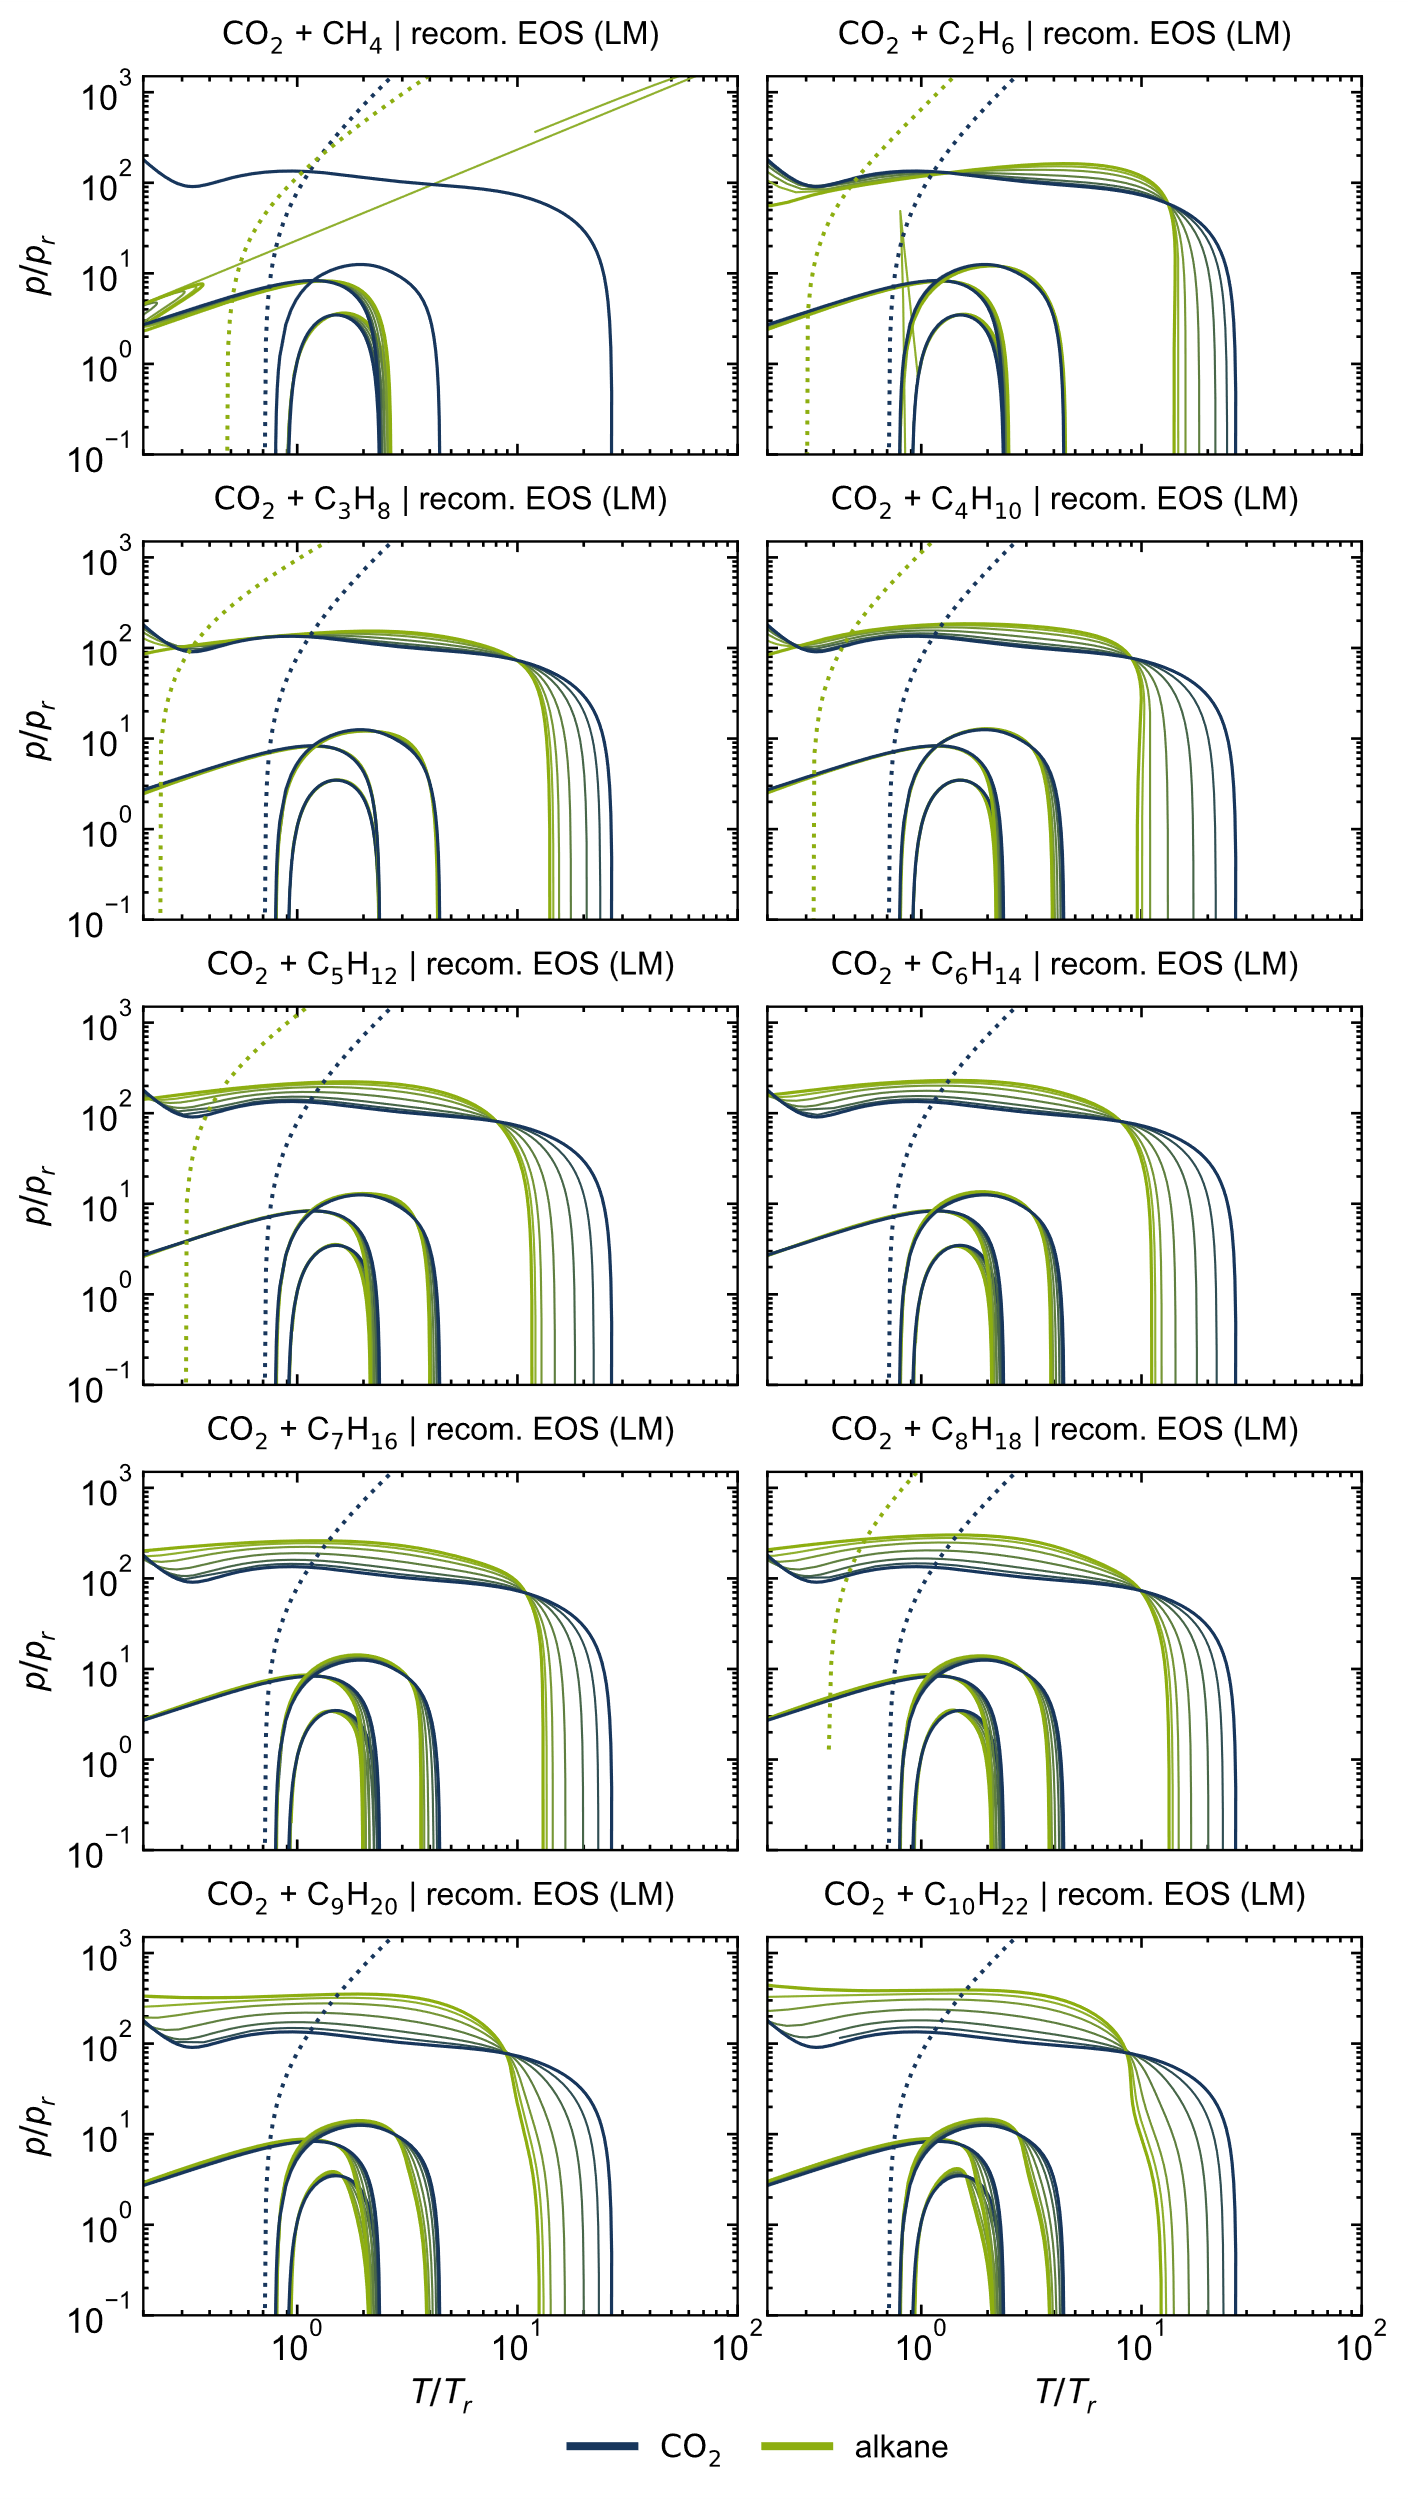


Figure S 9: Ideal curves of all considered CO2 + alkane mixtures, calculated with the recommended EOS [2, 4–12] using the linear mixing rule (LM).


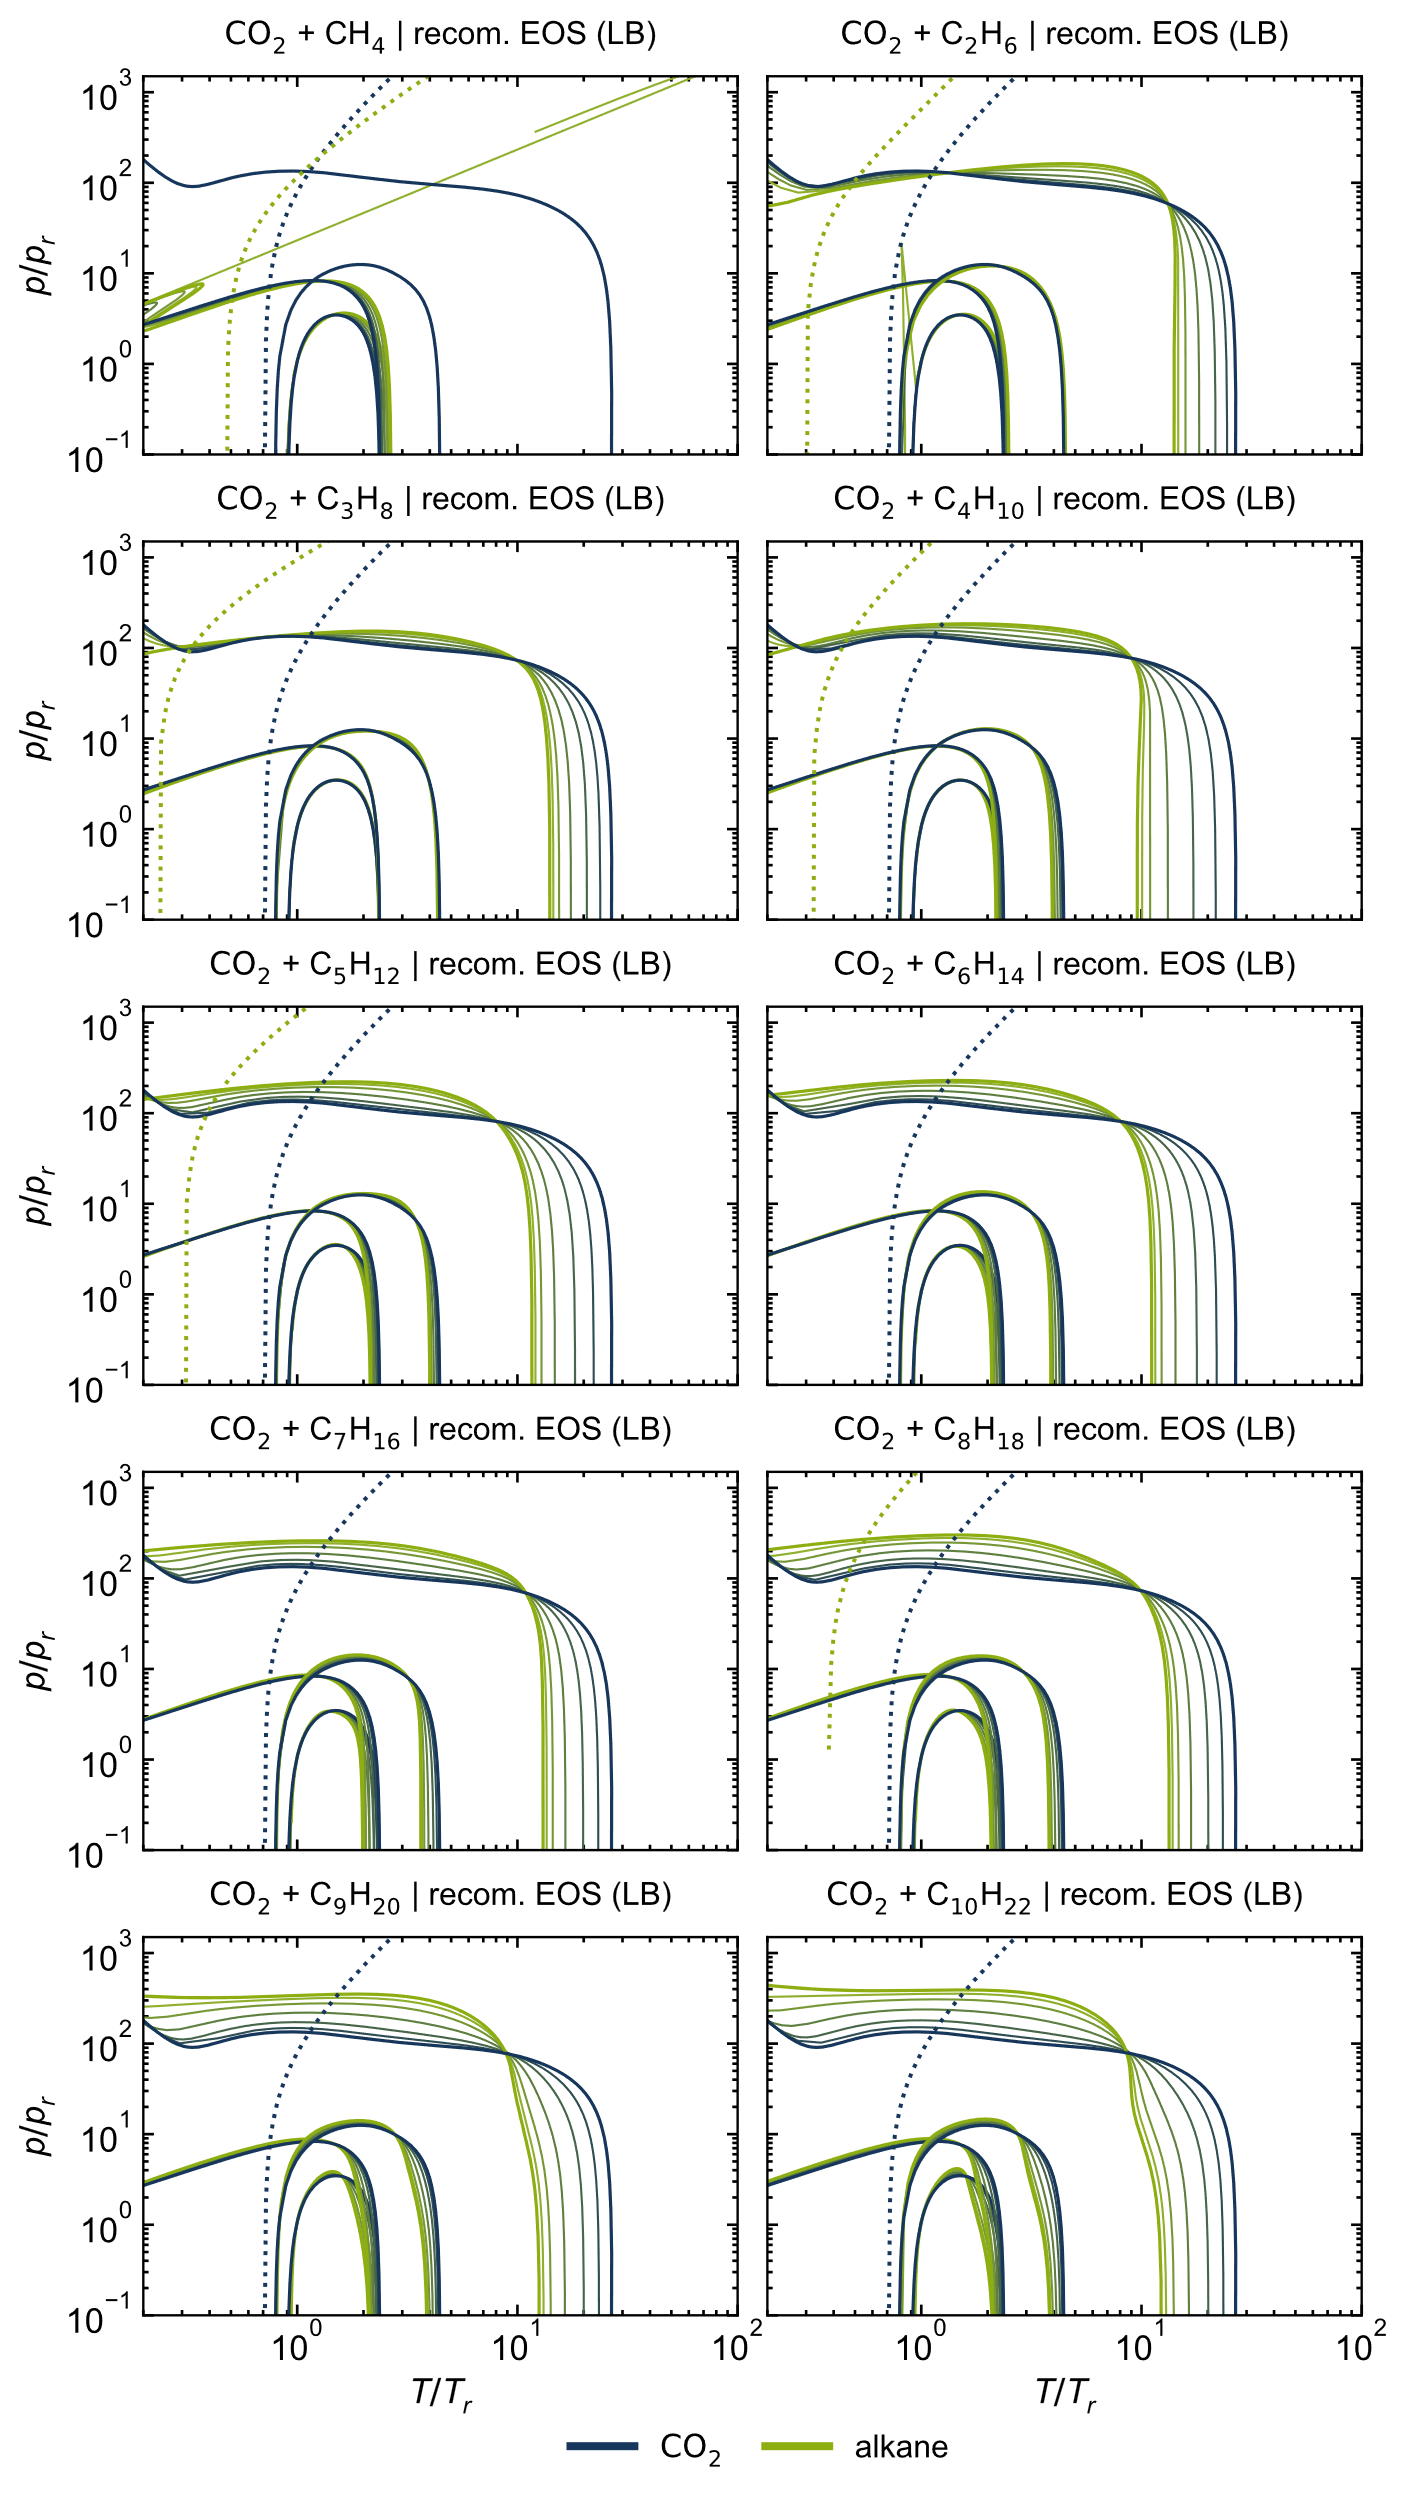


Figure S 10: Ideal curves of all considered CO2 + alkane mixtures, calculated with the recommended EOS [2, 4–12] using the Lorentz-Berthelot mixing rule (LB).


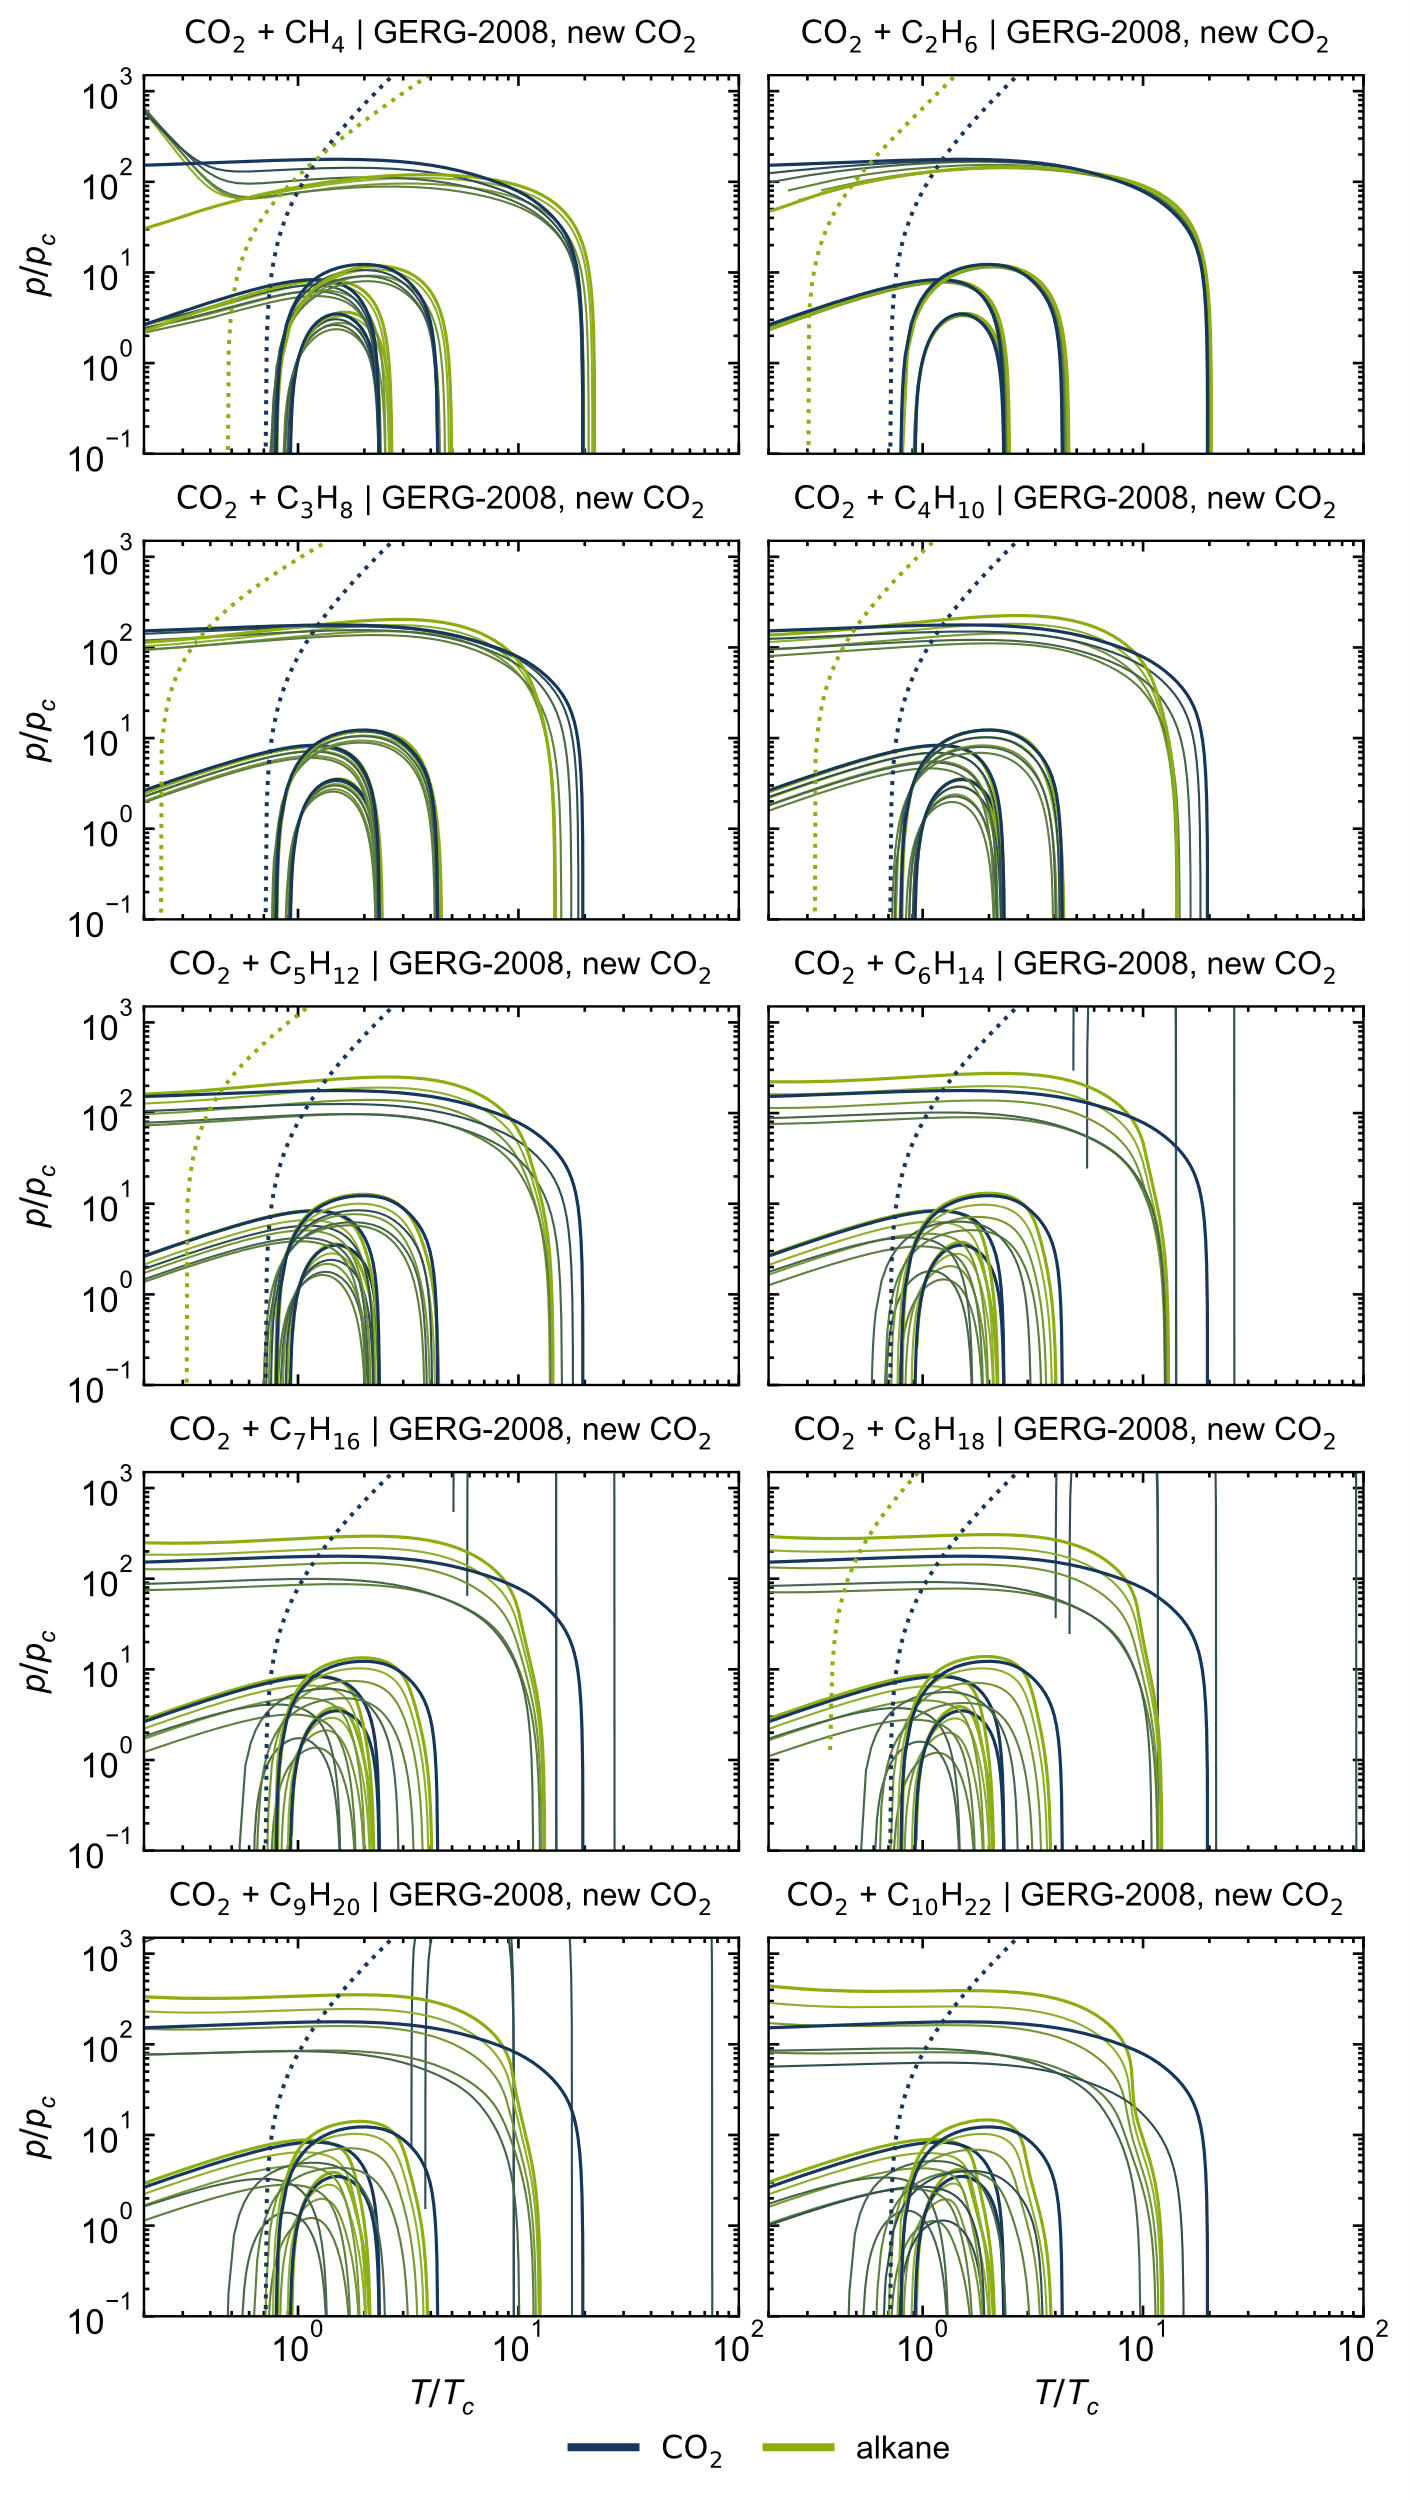


Figure S 11: Ideal curves of all considered CO2 + alkane mixtures, calculated with the GERG-2008 model [1] and the new preliminary EOS for CO2 [3], normalized with the calculated critical values.


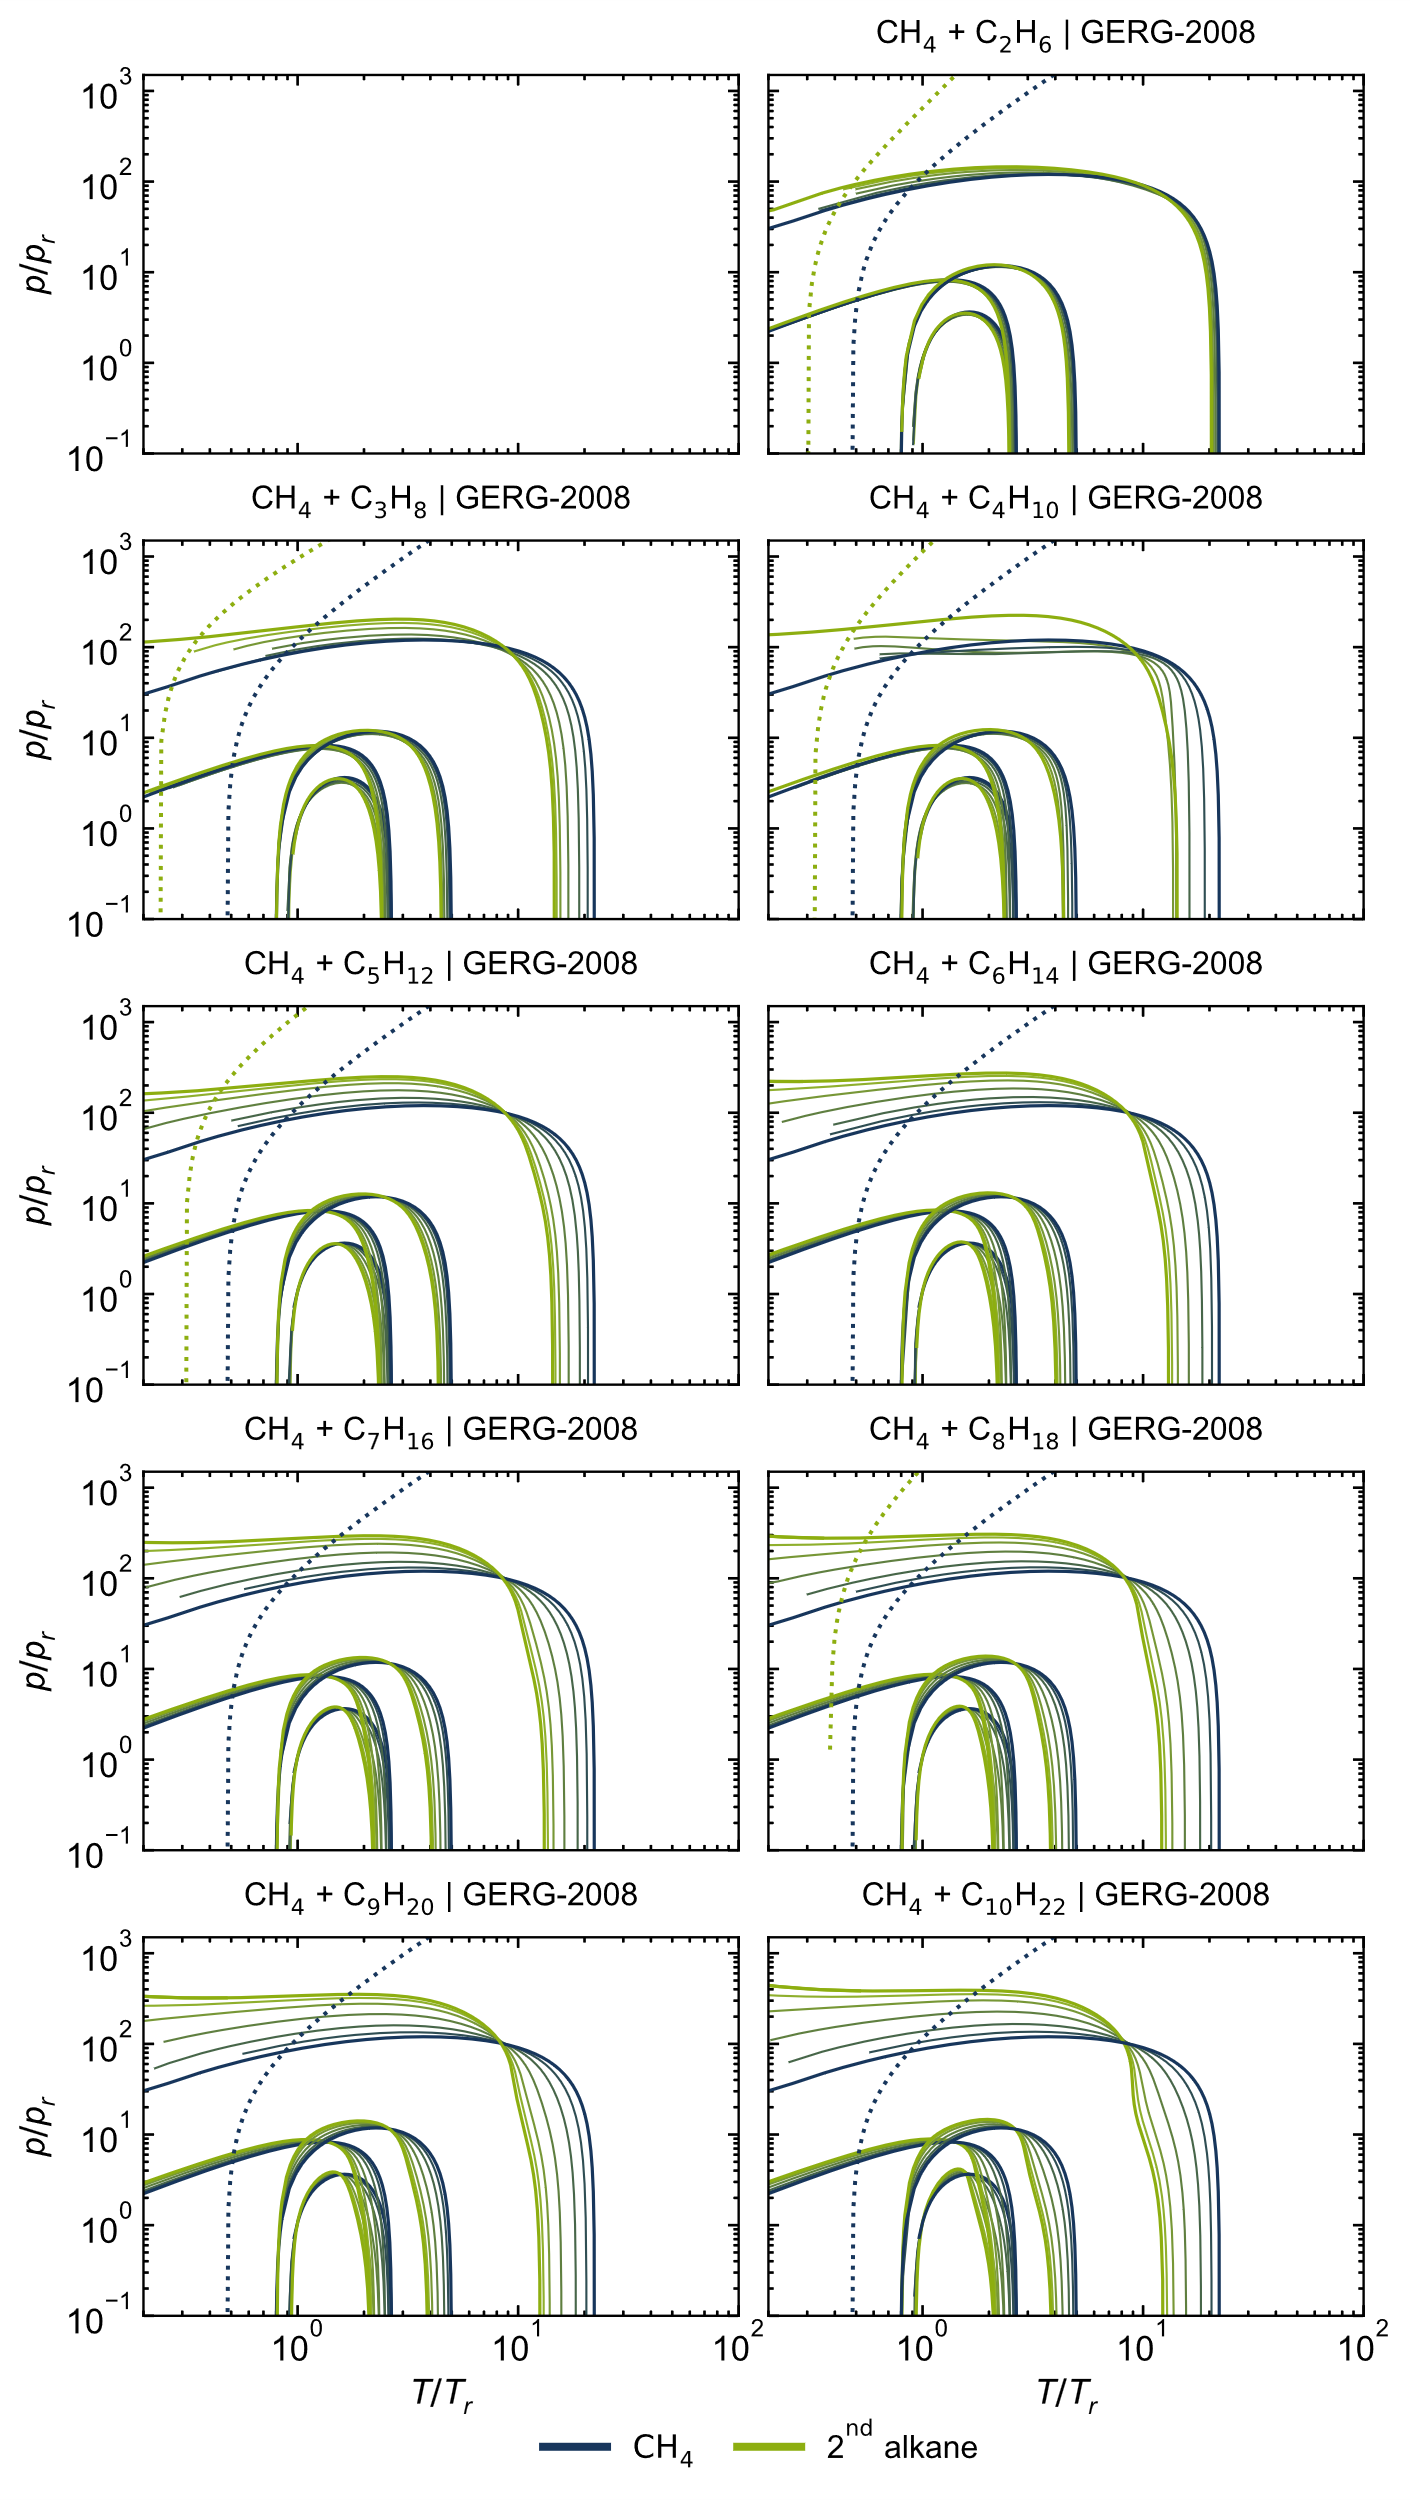


Figure S 12: Ideal curves of all considered CH4 + alkane mixtures, calculated with the GERG-2008 model [1].


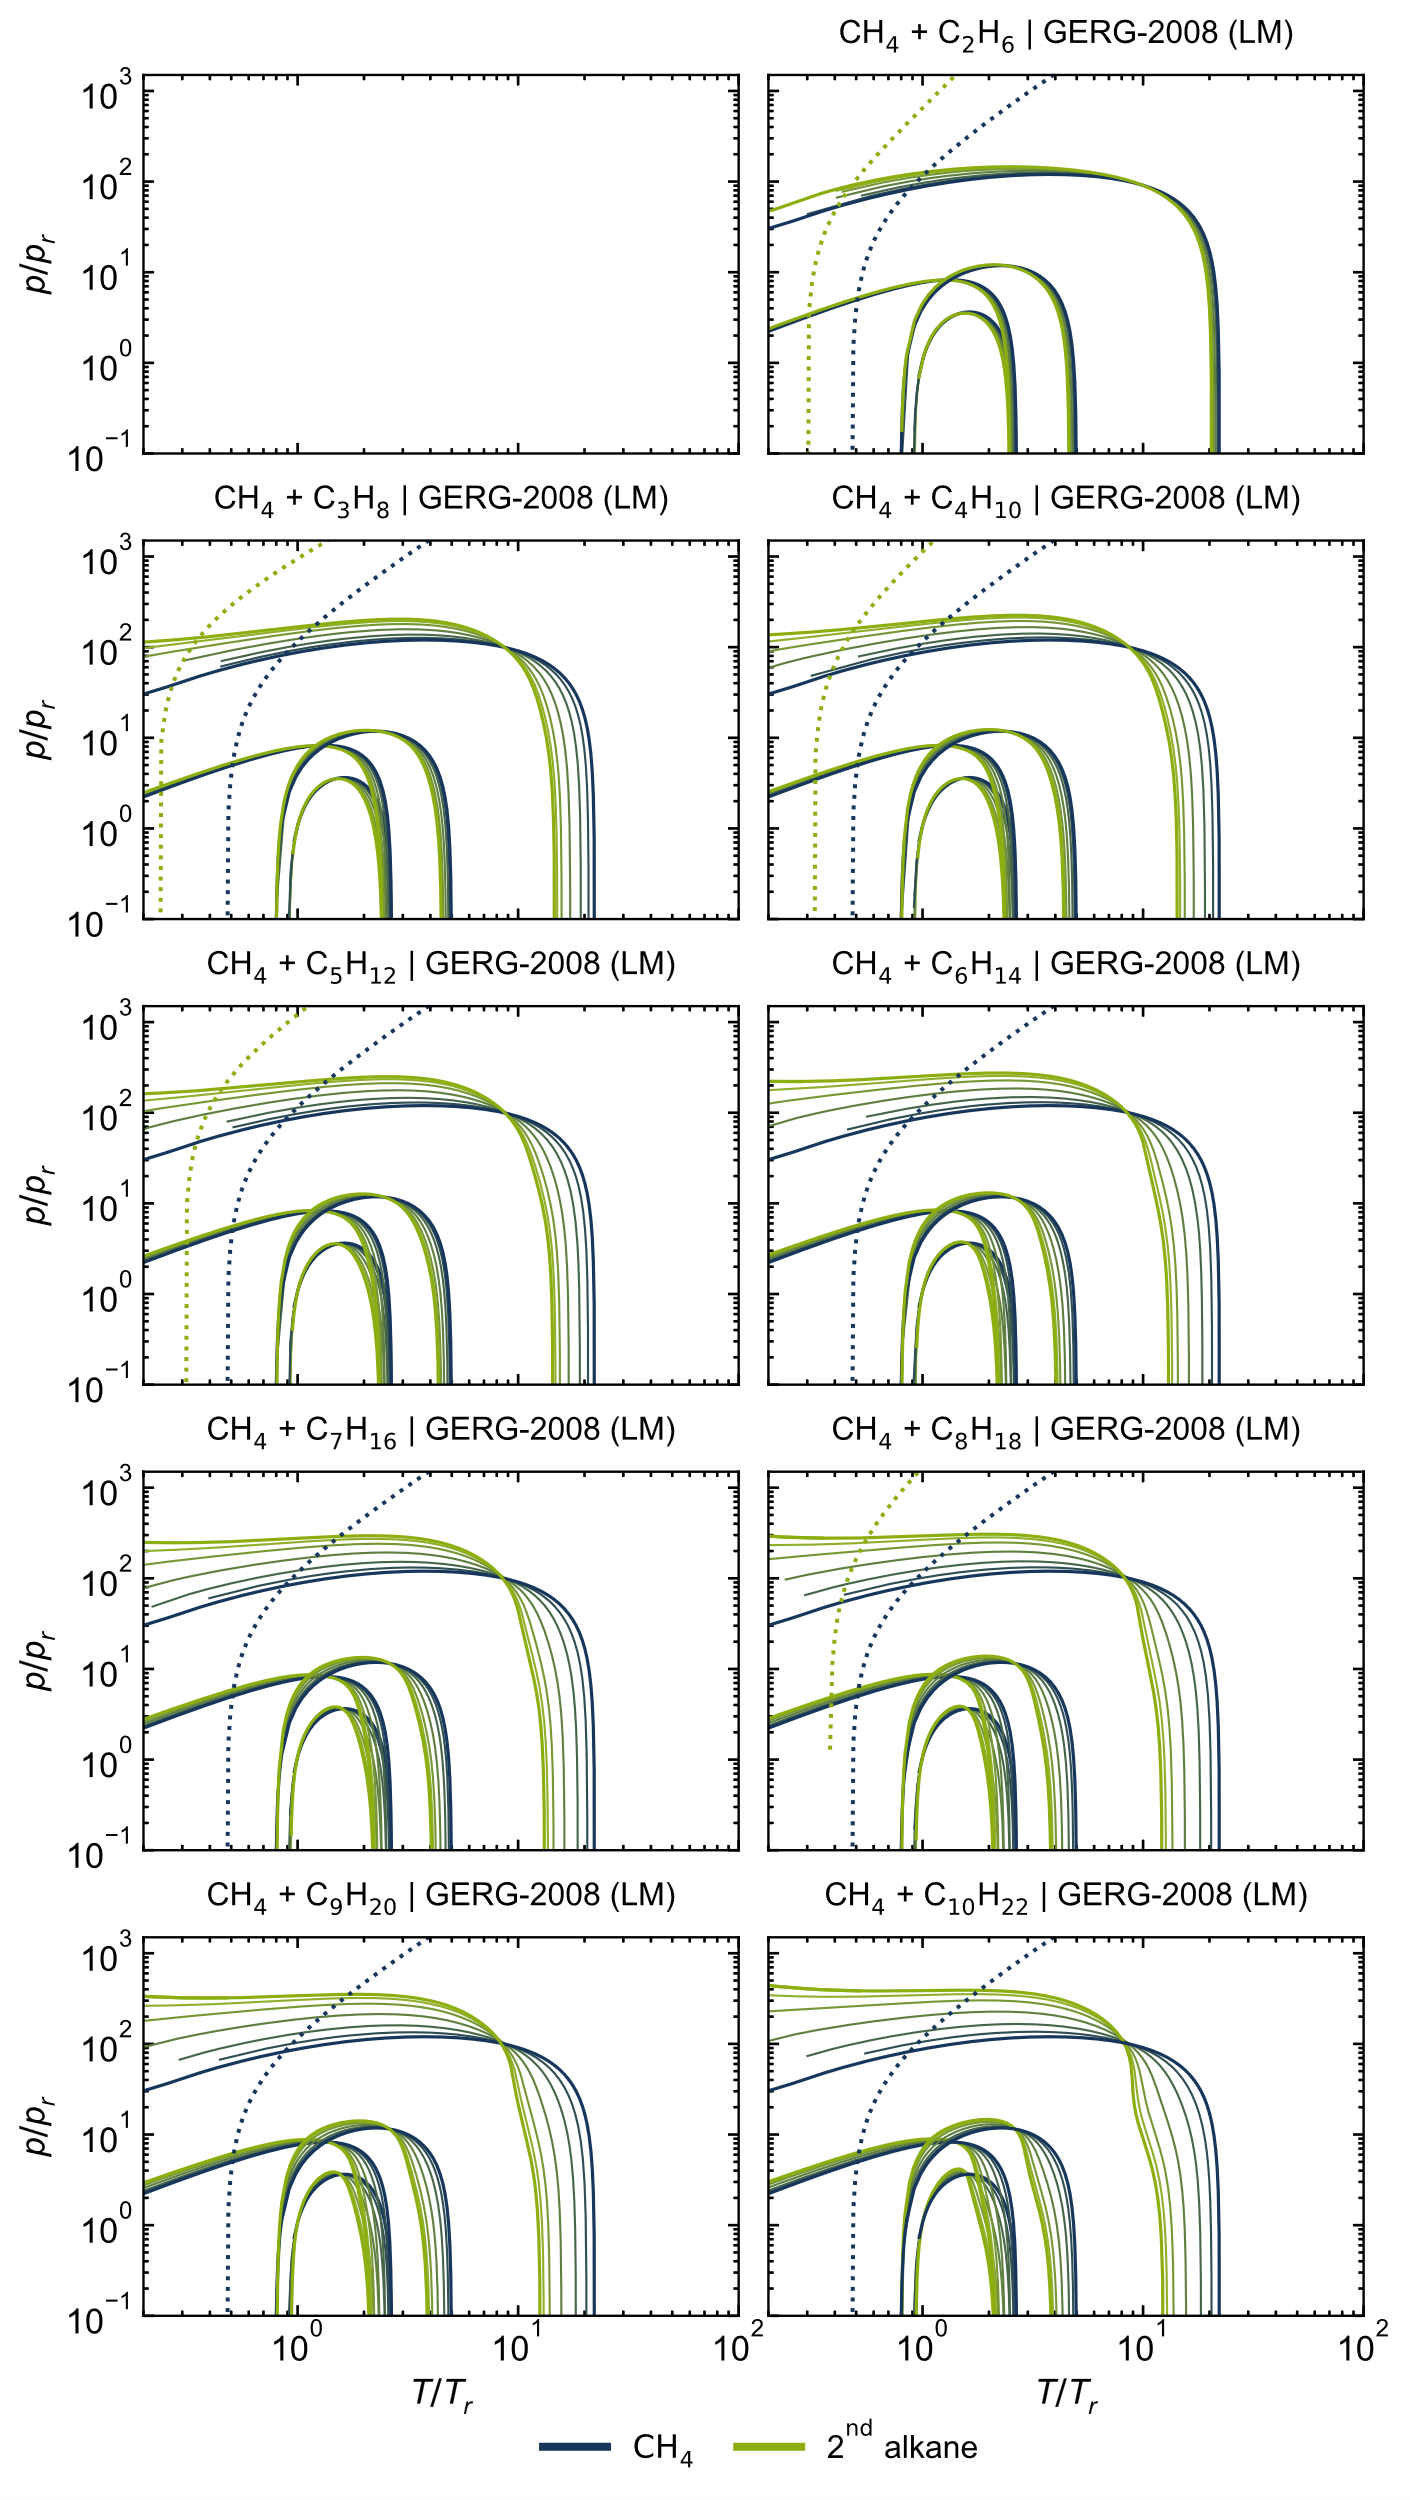


Figure S 13: Ideal curves of all considered CH4 + alkane mixtures, calculated with the GERG-2008 model [1] using the linear mixing rule (LM).


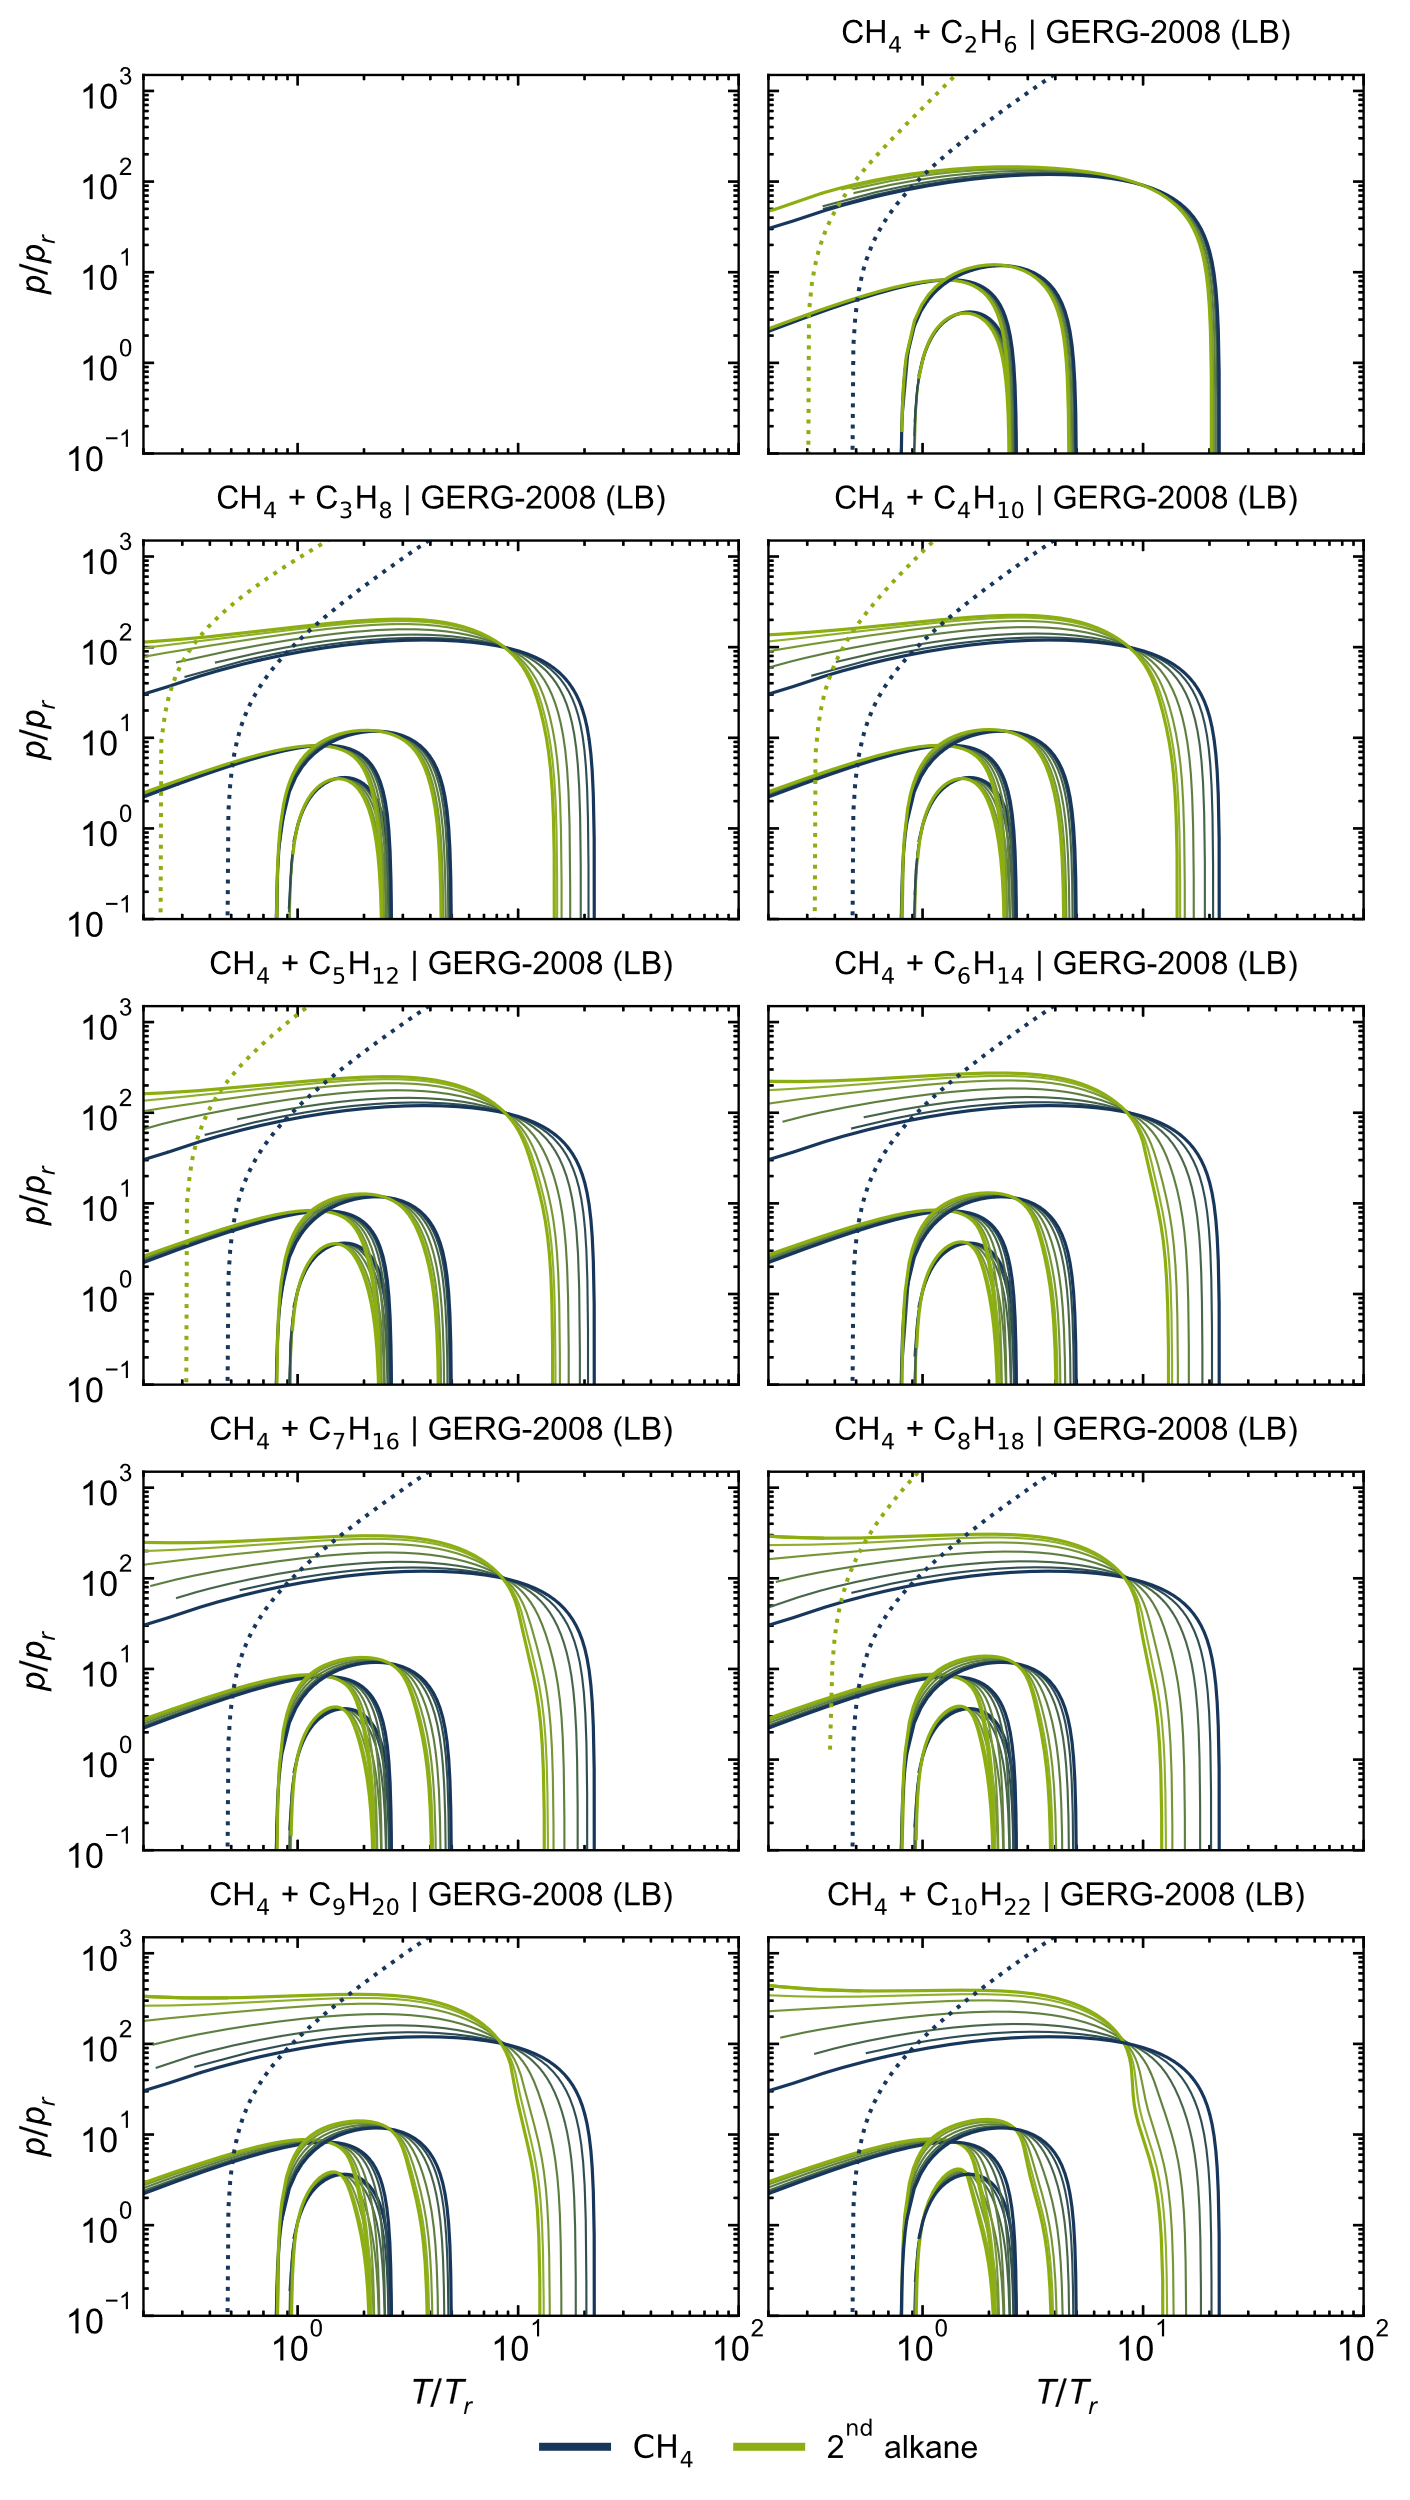


Figure S 14: Ideal curves of all considered CH4 + alkane mixtures, calculated with the GERG-2008 model [1] using the Lorentz-Berthelot mixing rule (LB).

## Classical Ideal Curves: reduced *T*, *ρ* diagrams


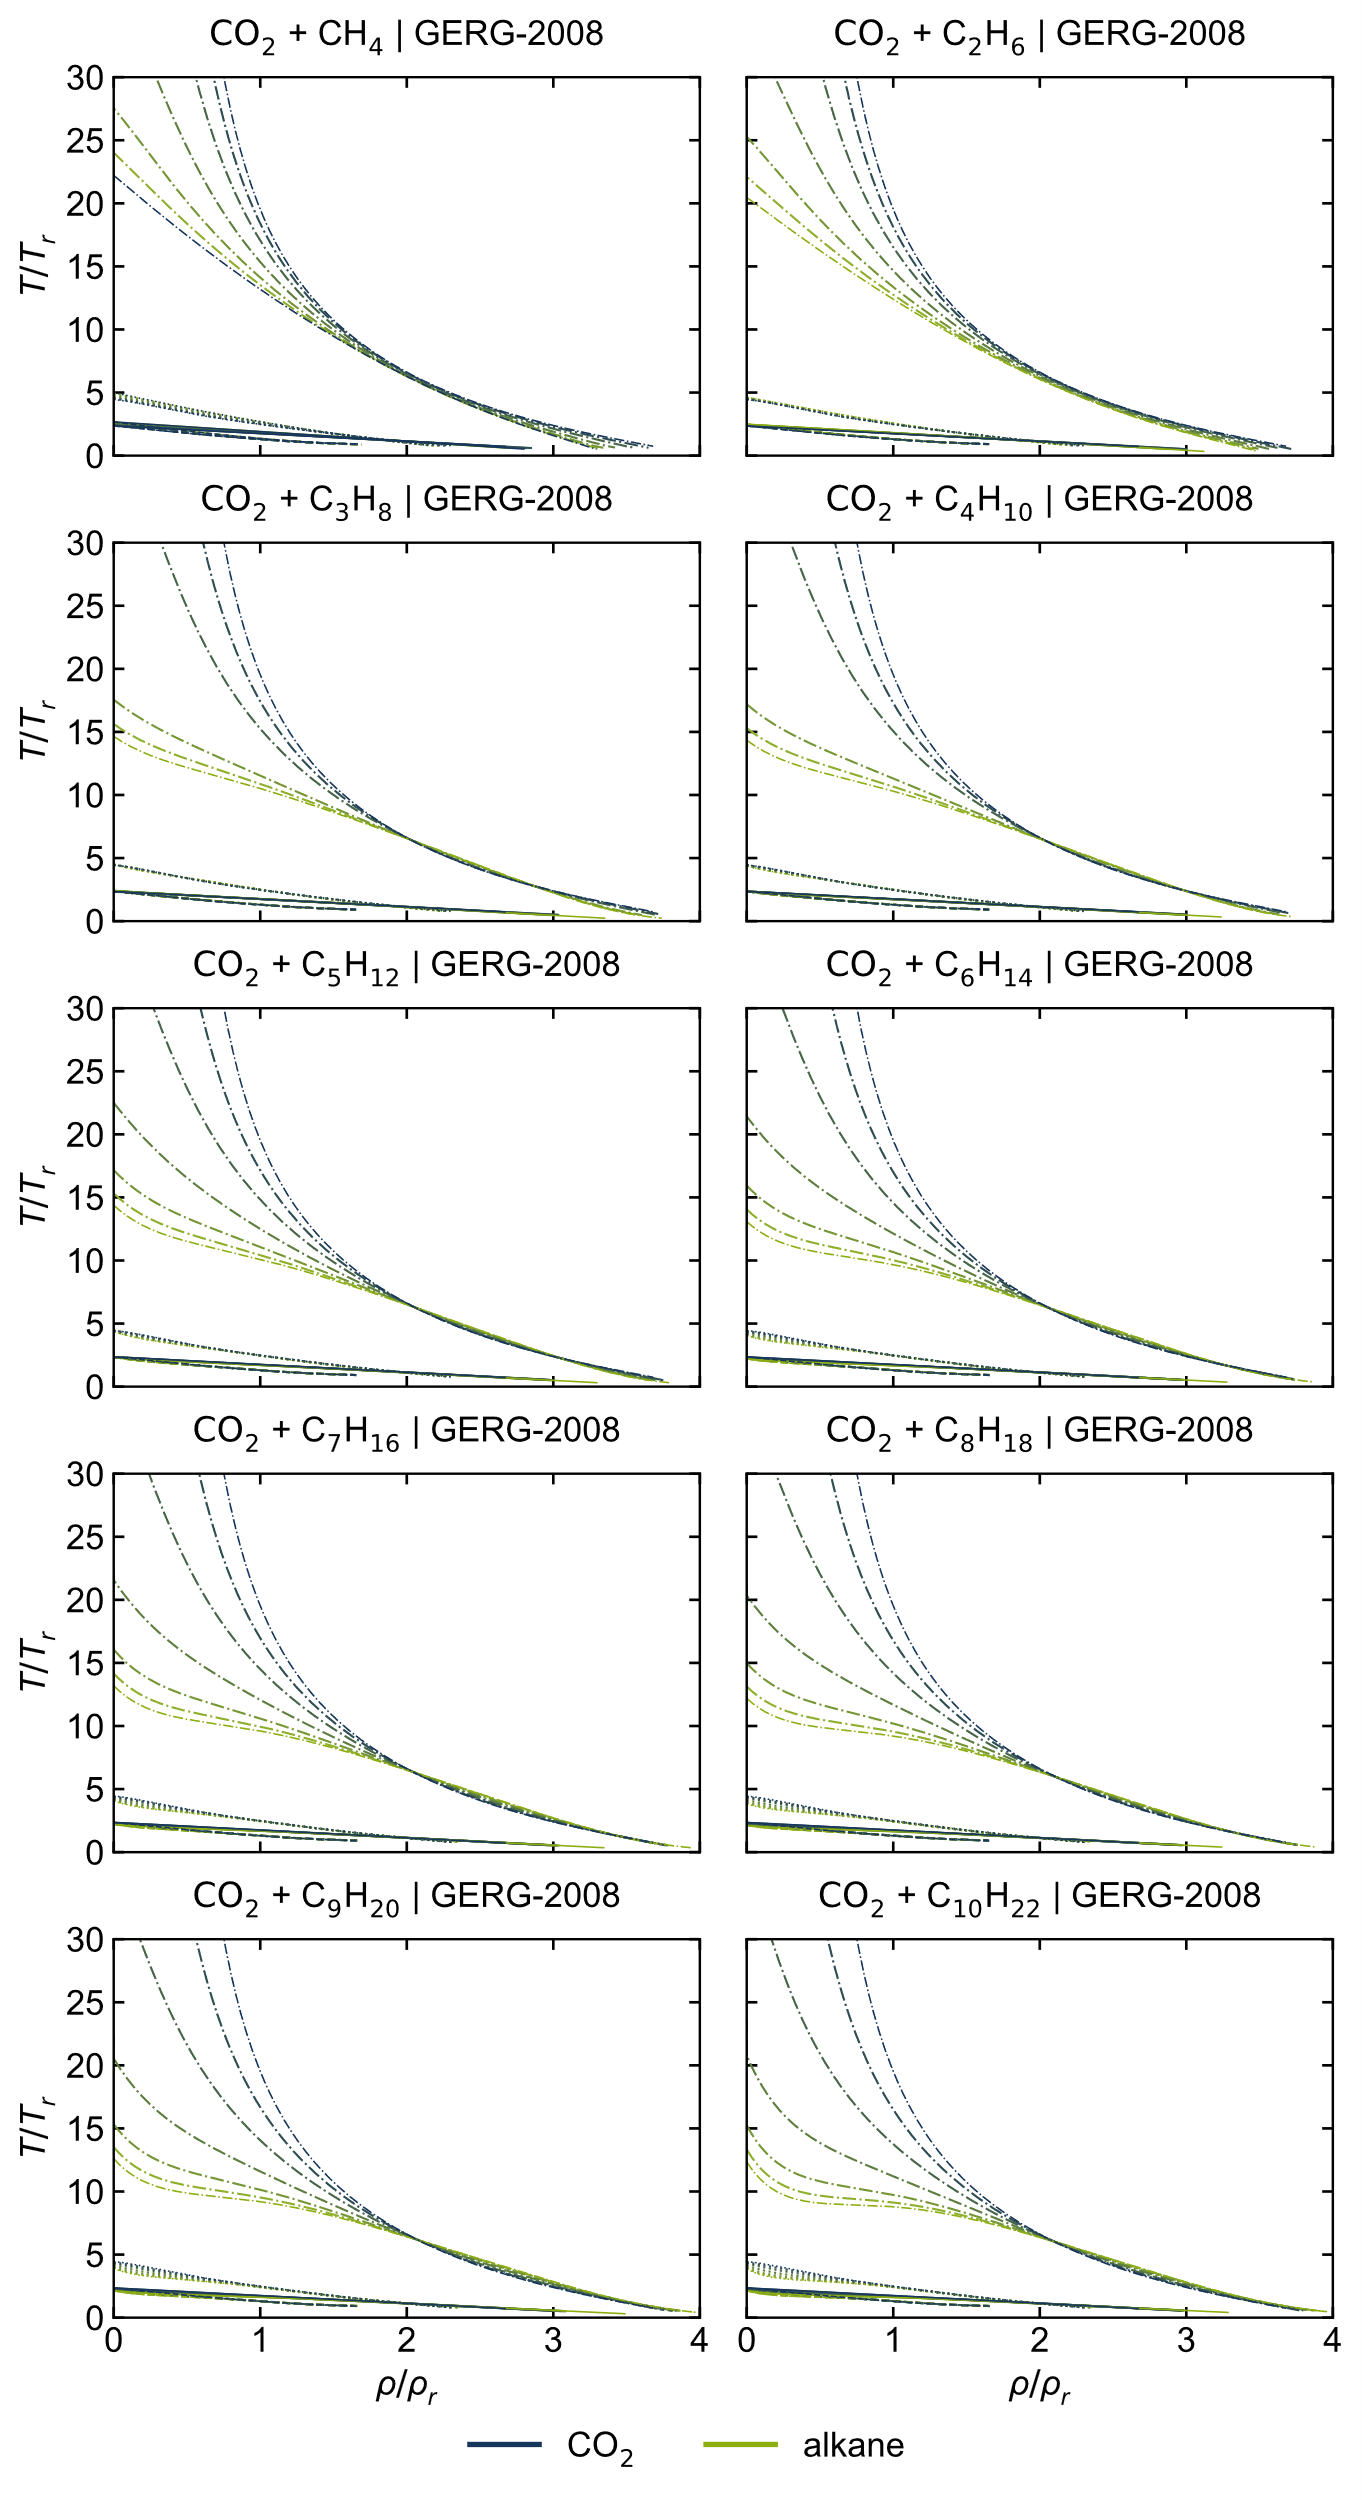


Figure S 15: *T*,*ρ*-curves of all considered CO2 + alkane mixtures, calculated with the GERG-2008 model [1].


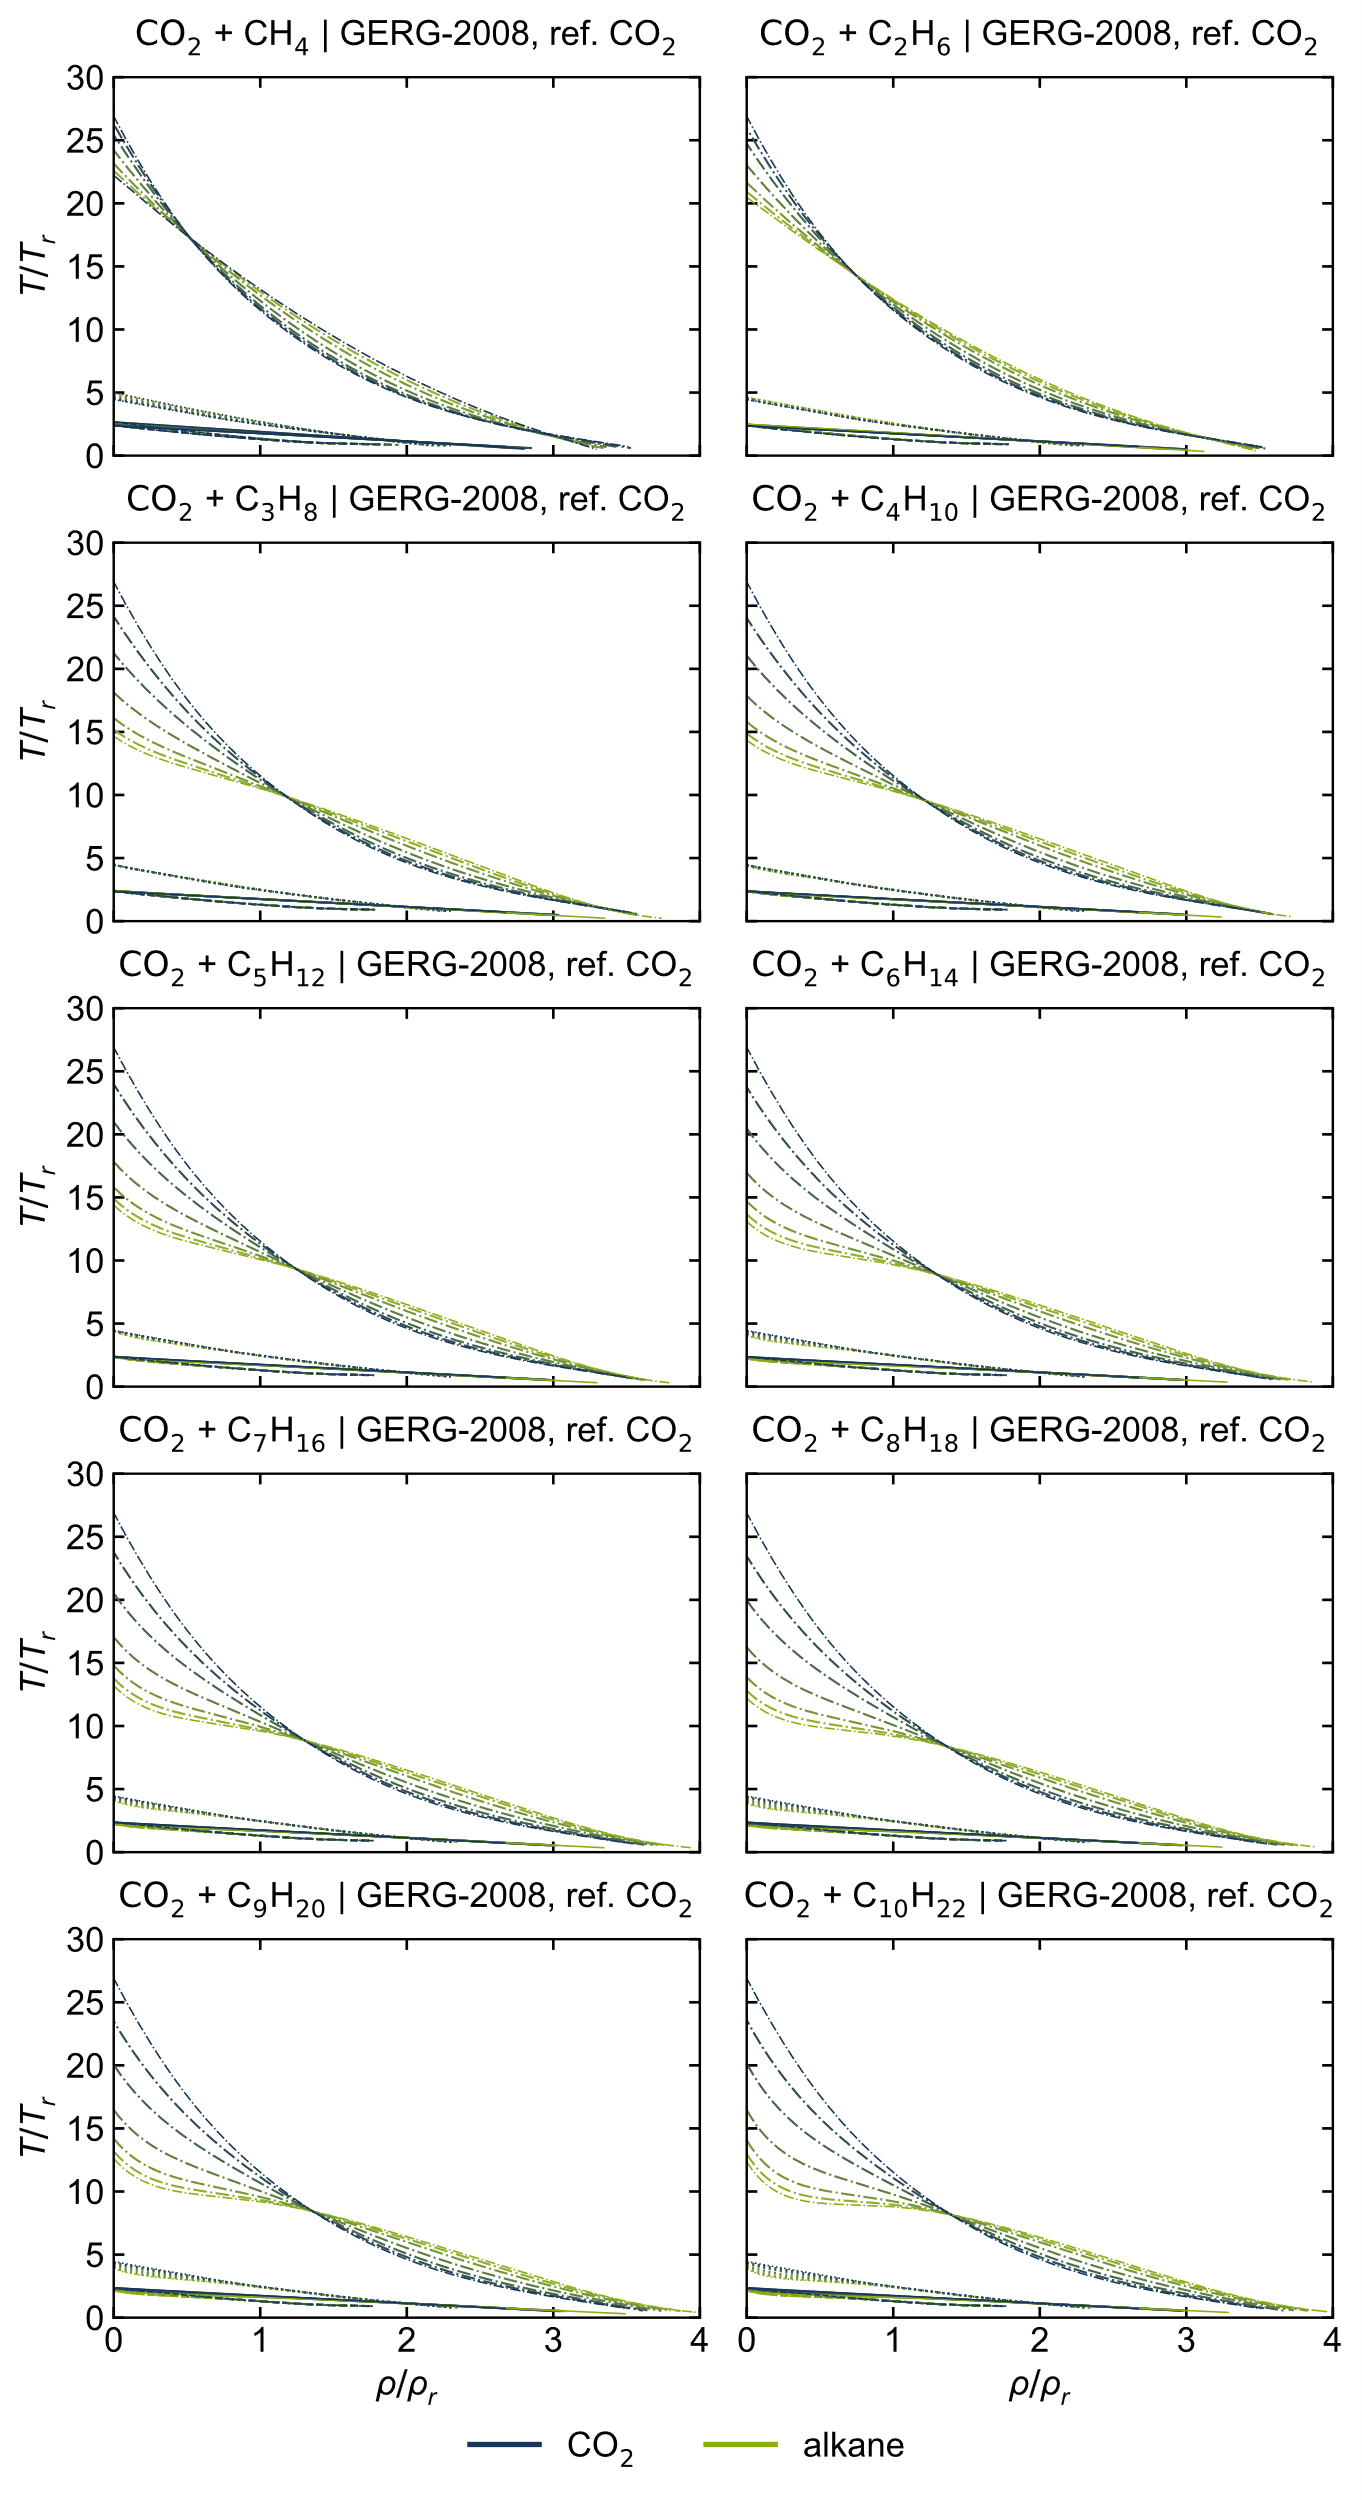


Figure S 16: *T*,*ρ*-curves of all considered CO2 + alkane mixtures, calculated with the GERG-2008 model [1] with the reference CO2-EOS [2].


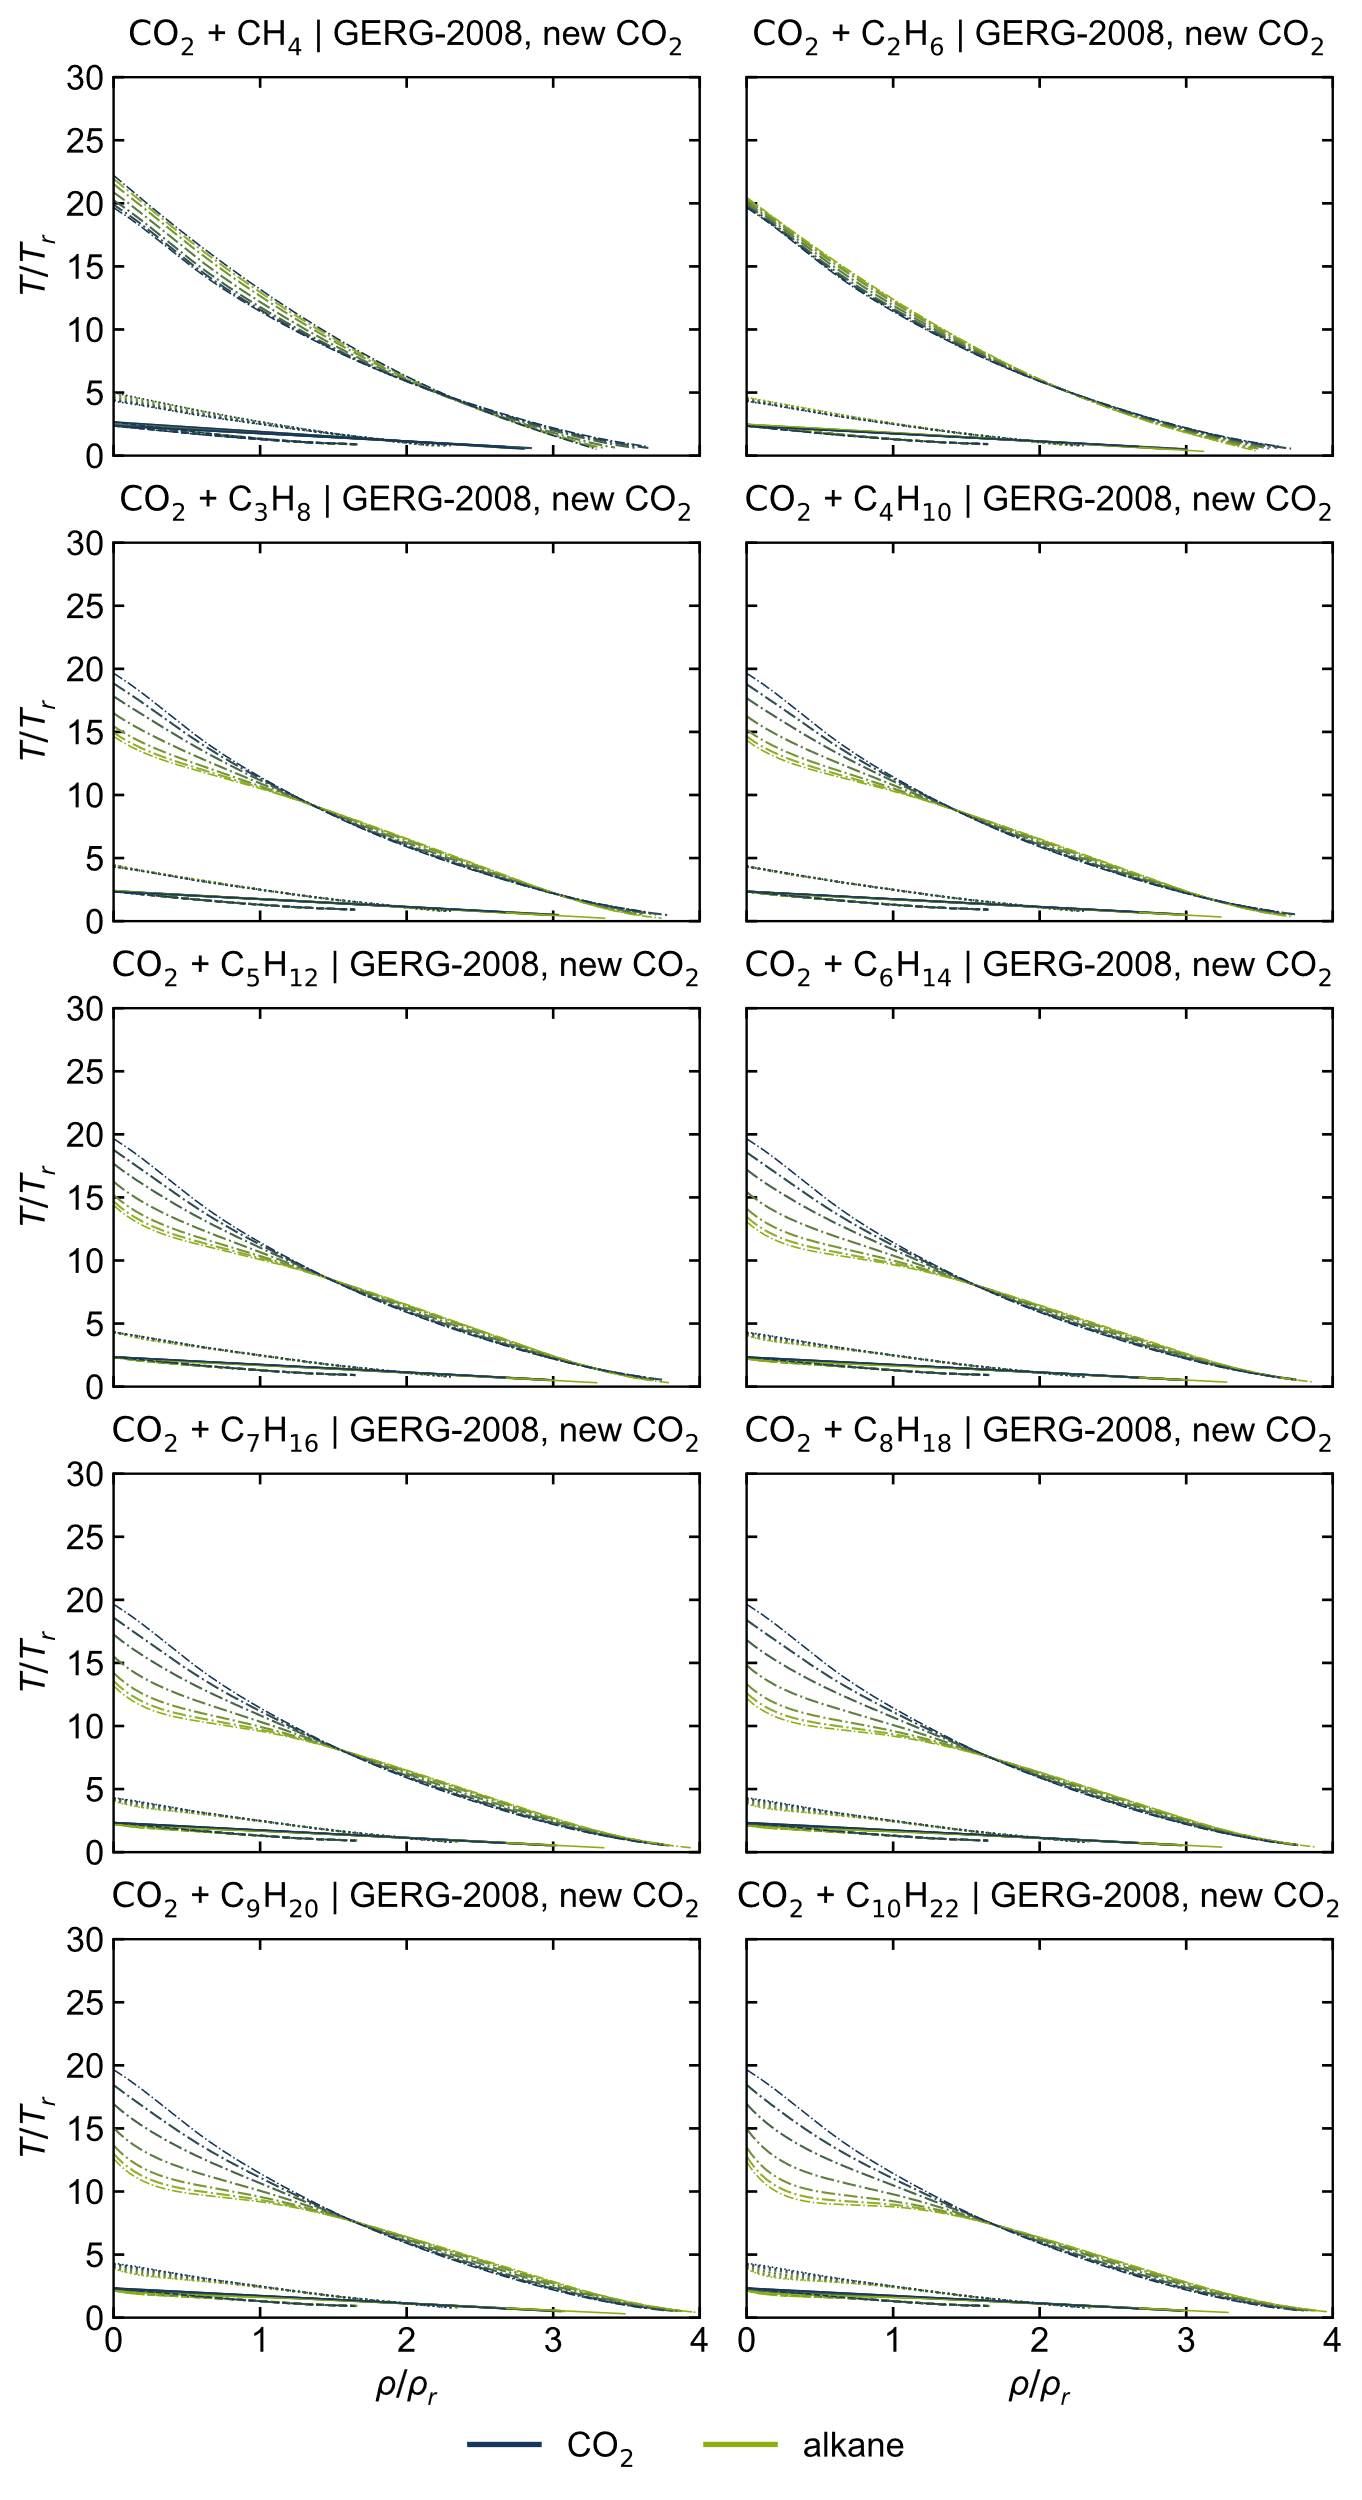


Figure S 17: *T*,*ρ*-curves of all considered CO2 + alkane mixtures, calculated with the GERG-2008 model [1] with the new preliminary CO2-EOS [3].


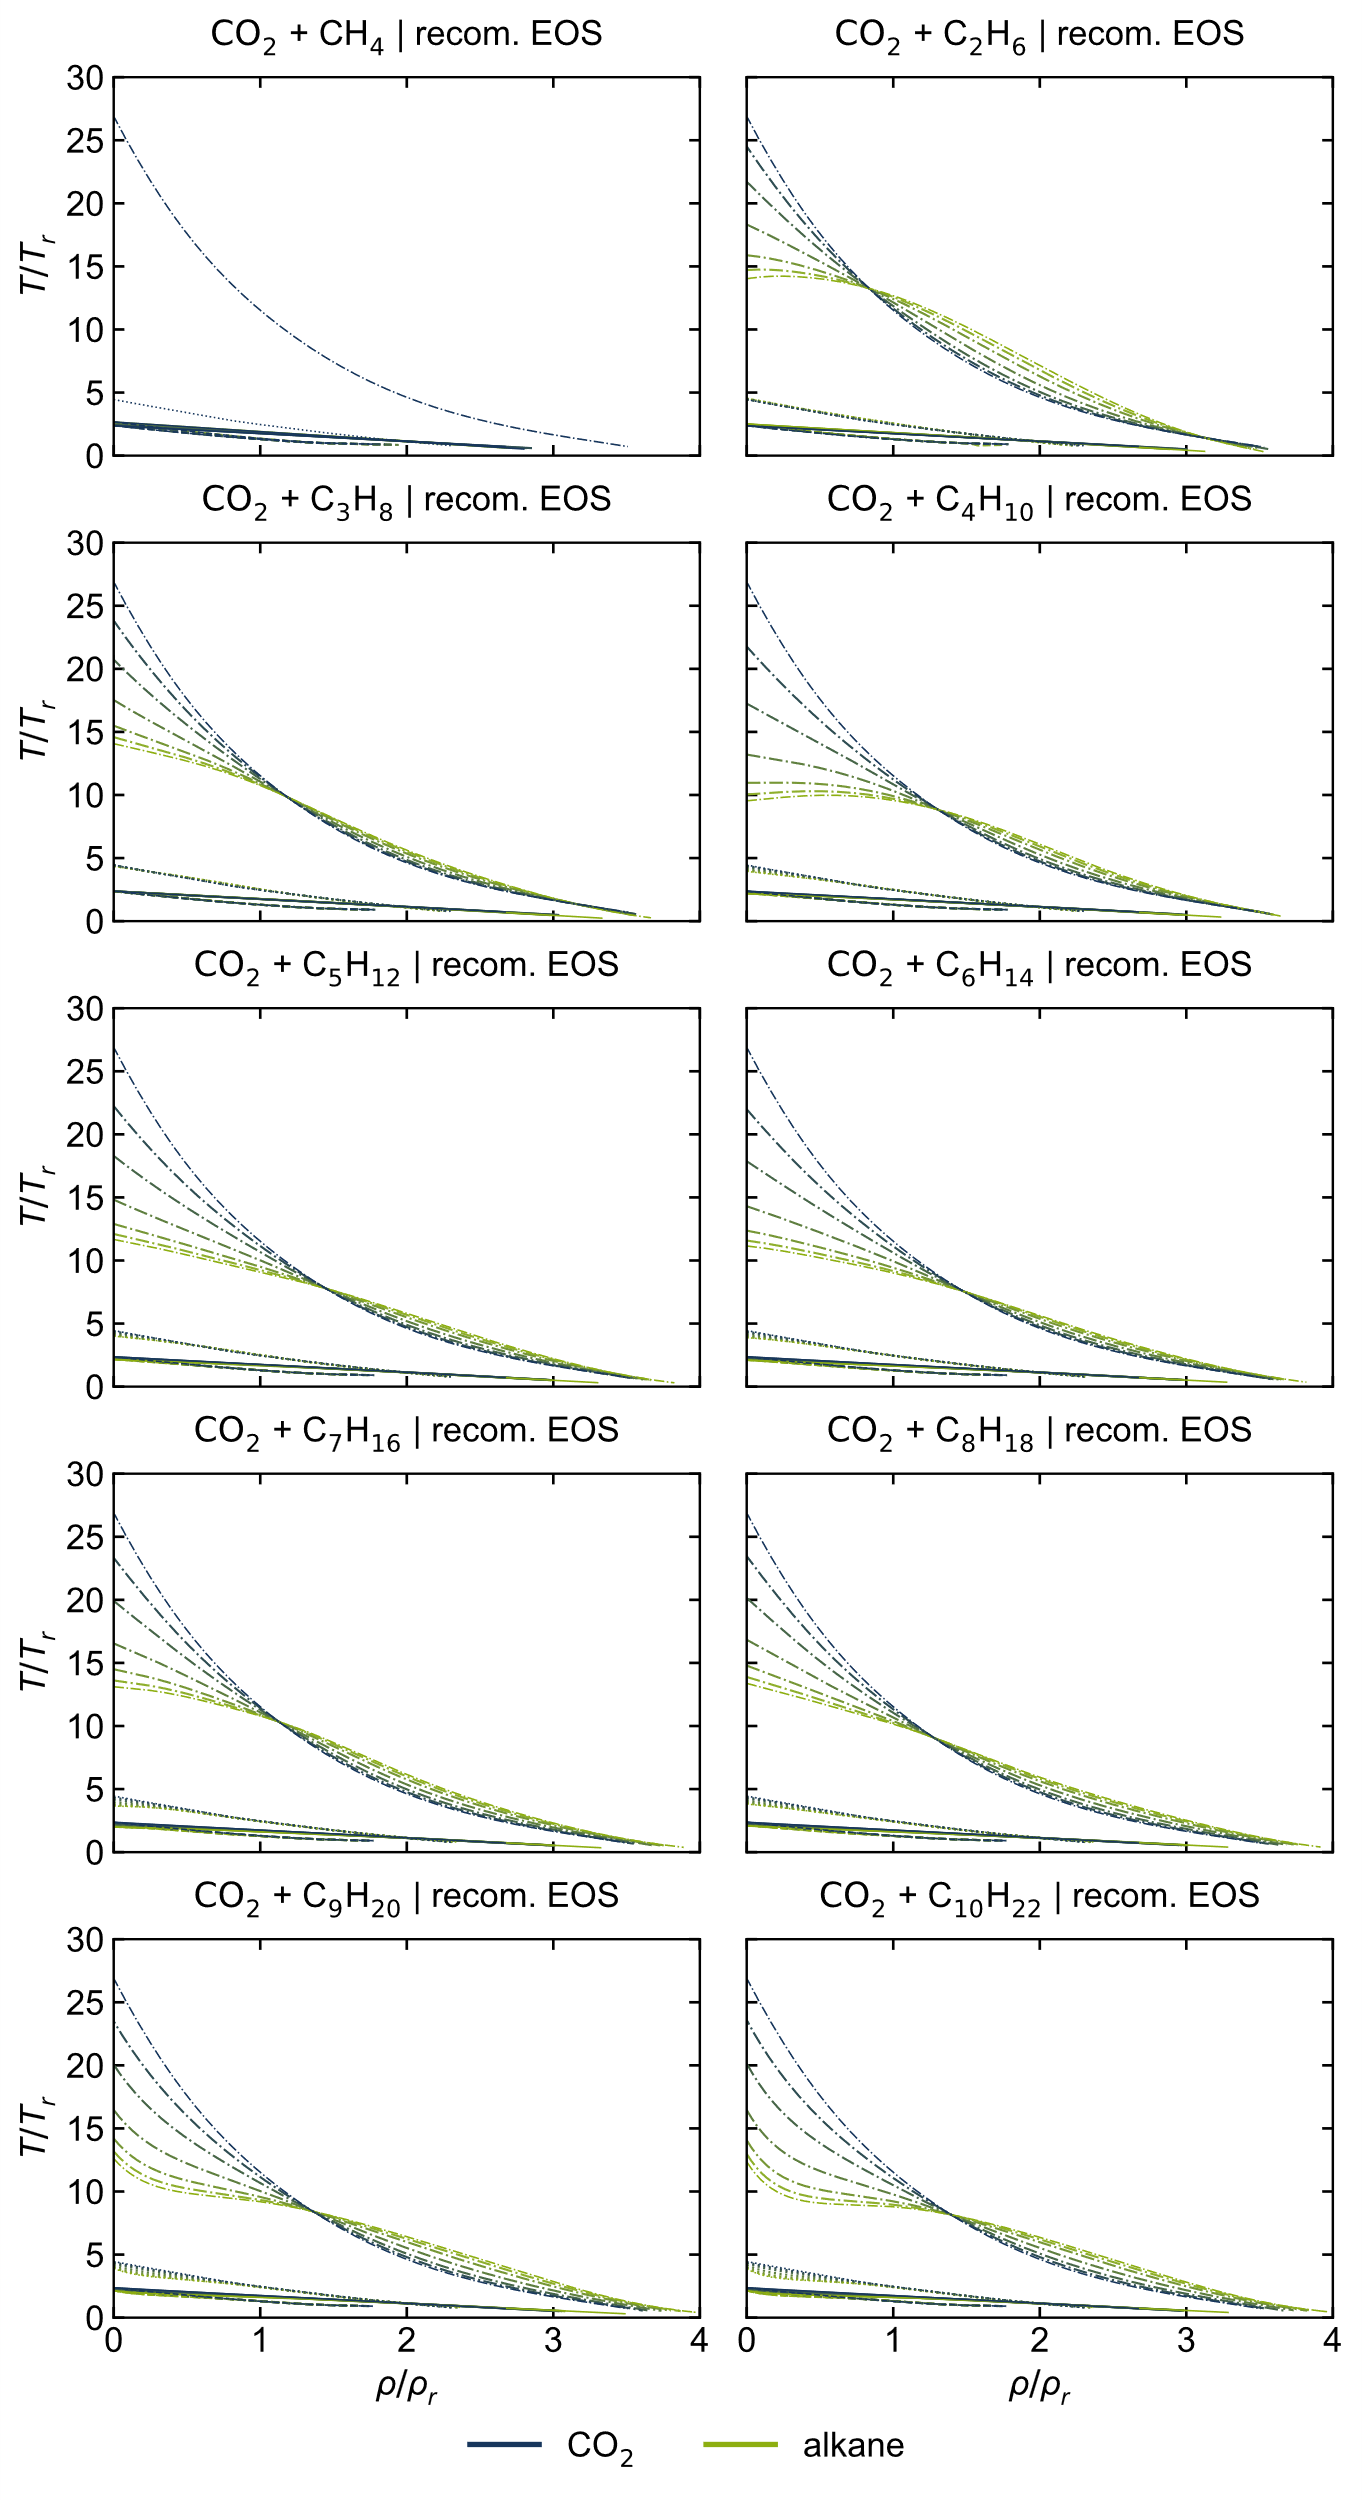


Figure S 18: *T*,*ρ*-curves of all considered CO2 + alkane mixtures, calculated with the recommended EOS [2, 4–12].


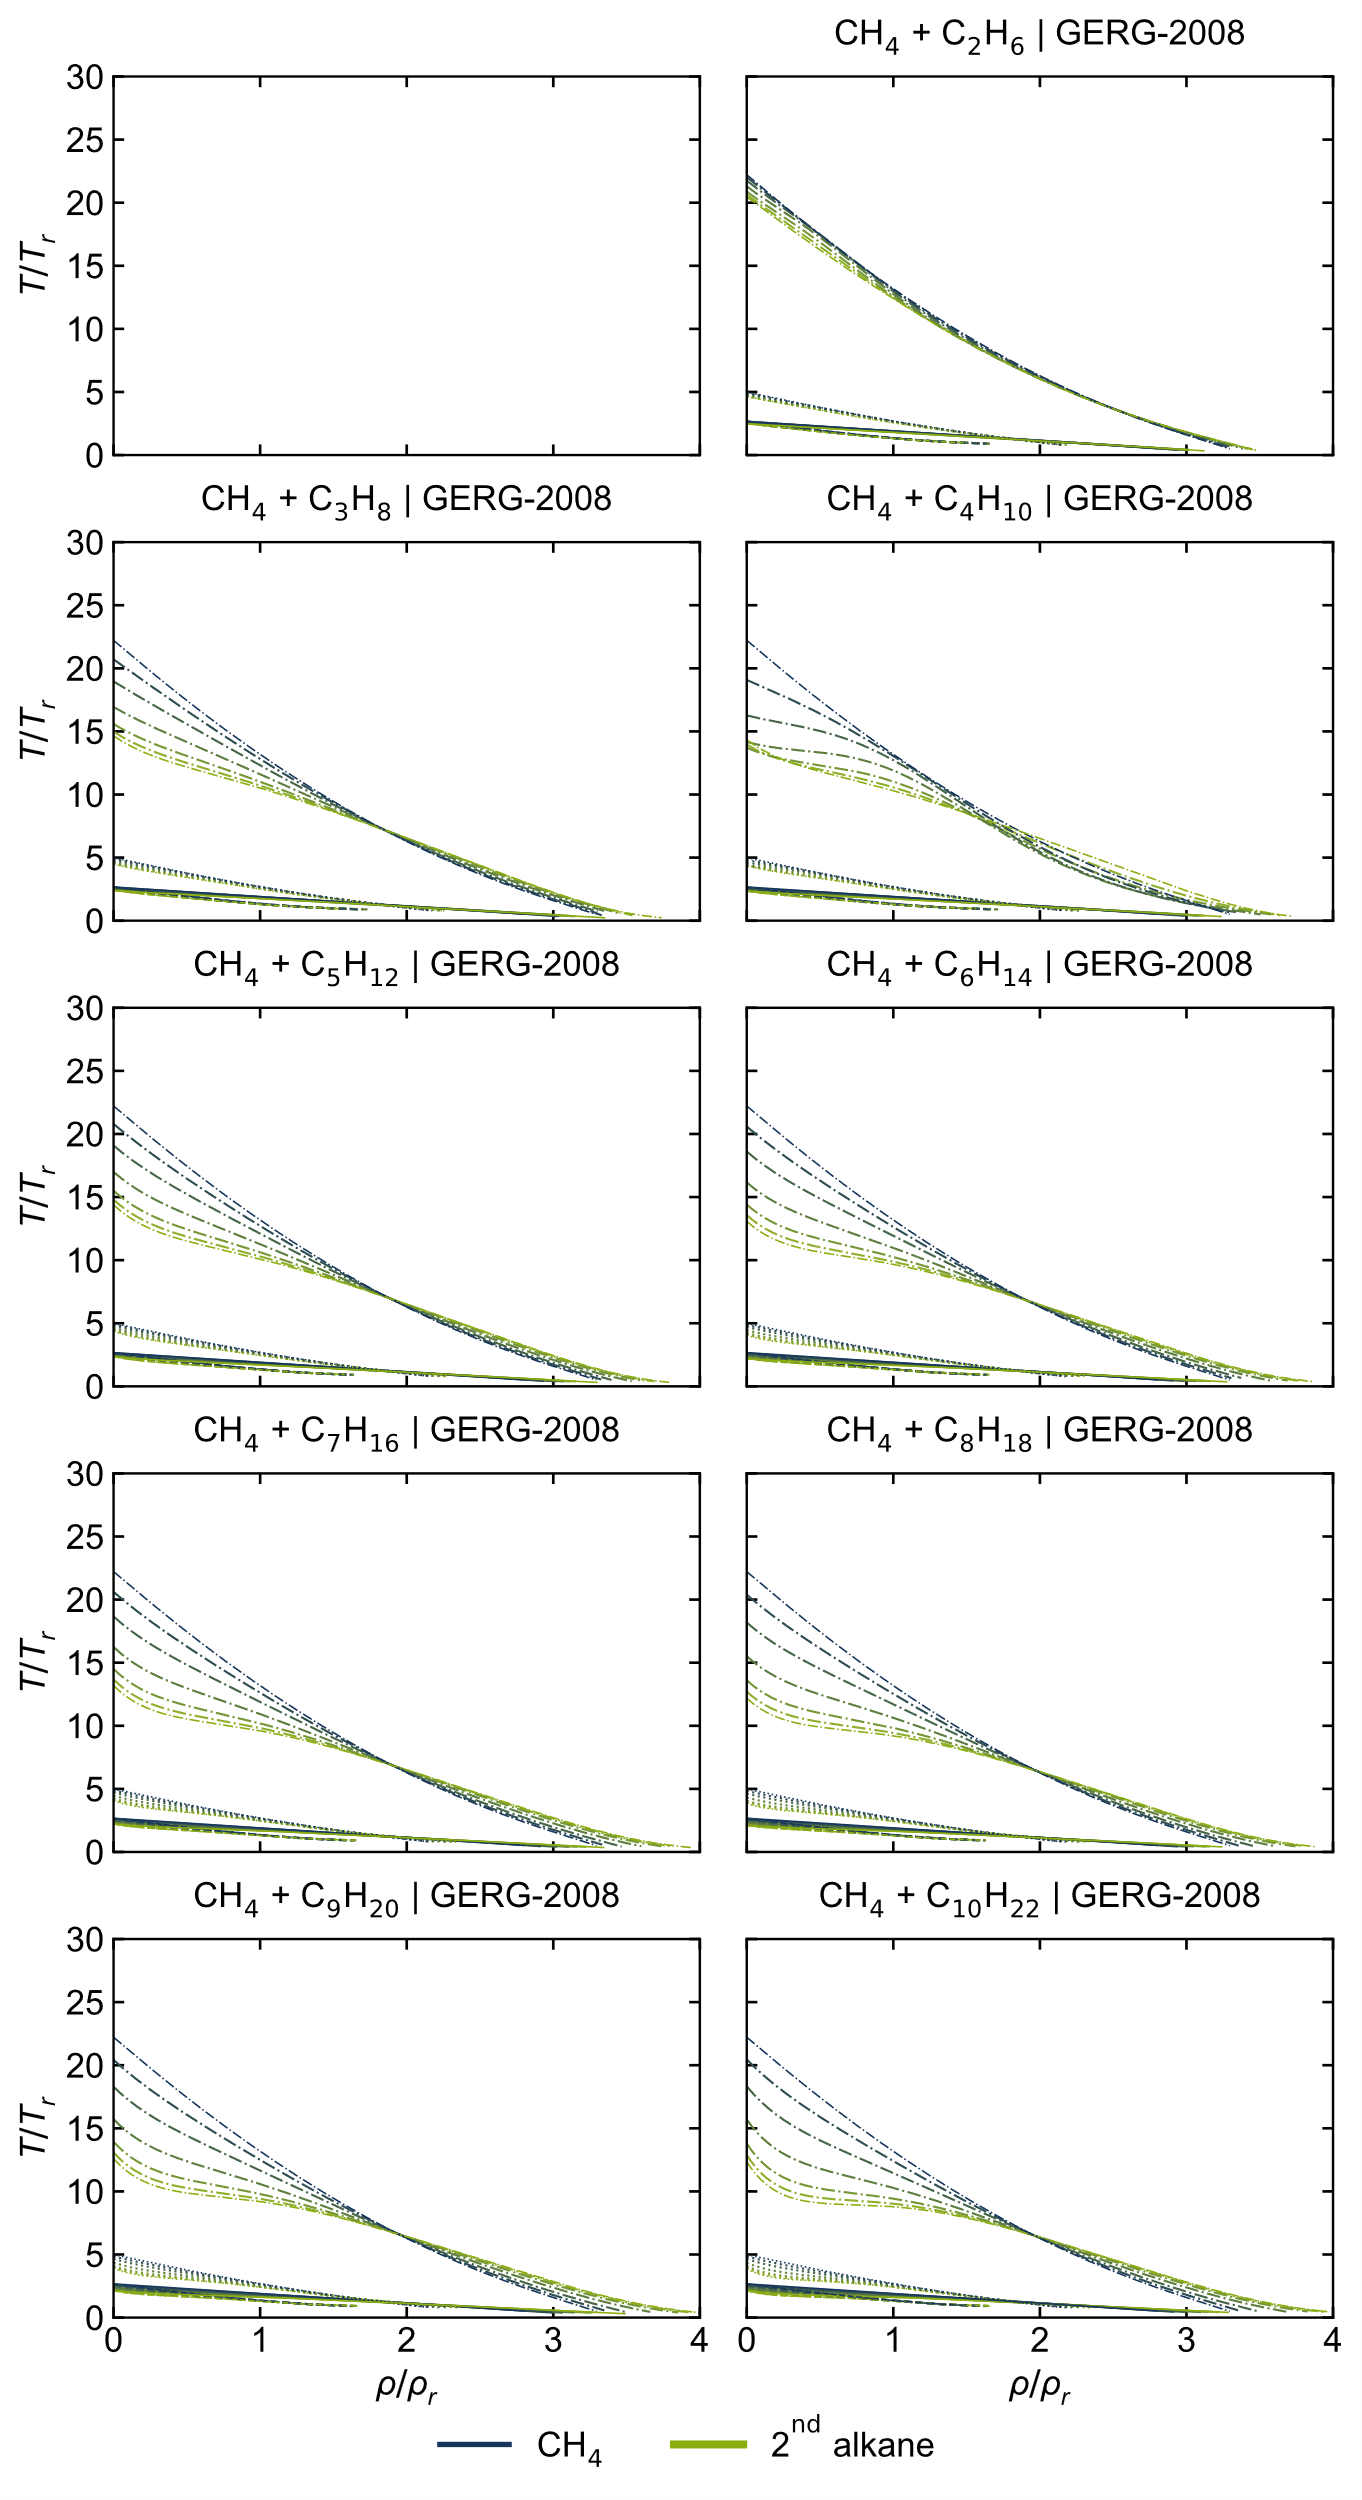


Figure S 19: *T*,*ρ*-curves of all considered CH4 + alkane mixtures, calculated with the GERG-2008 model [1].

## VLE data: *p,x* diagrams

Using the linear mixing rule and the Lorentz-Berthelot mixing rule instead of adjusted reducing and departure functions yields in lower accuracies in other properties, here shown for vapor-liquid-equilibria (VLE) in *p,x* diagrams. As illustrated in Figure S 20, the phase equilibria using the GERG-2008 model with the linear and the Lorentz-Berthelot mixing rule instead of the adjusted functions are described poorly. While observing some differences between both combining rules in the *p*,*x*-diagrams, no significant differences can be seen in the ideal curves (see Figure S 3 and Figure S 4).


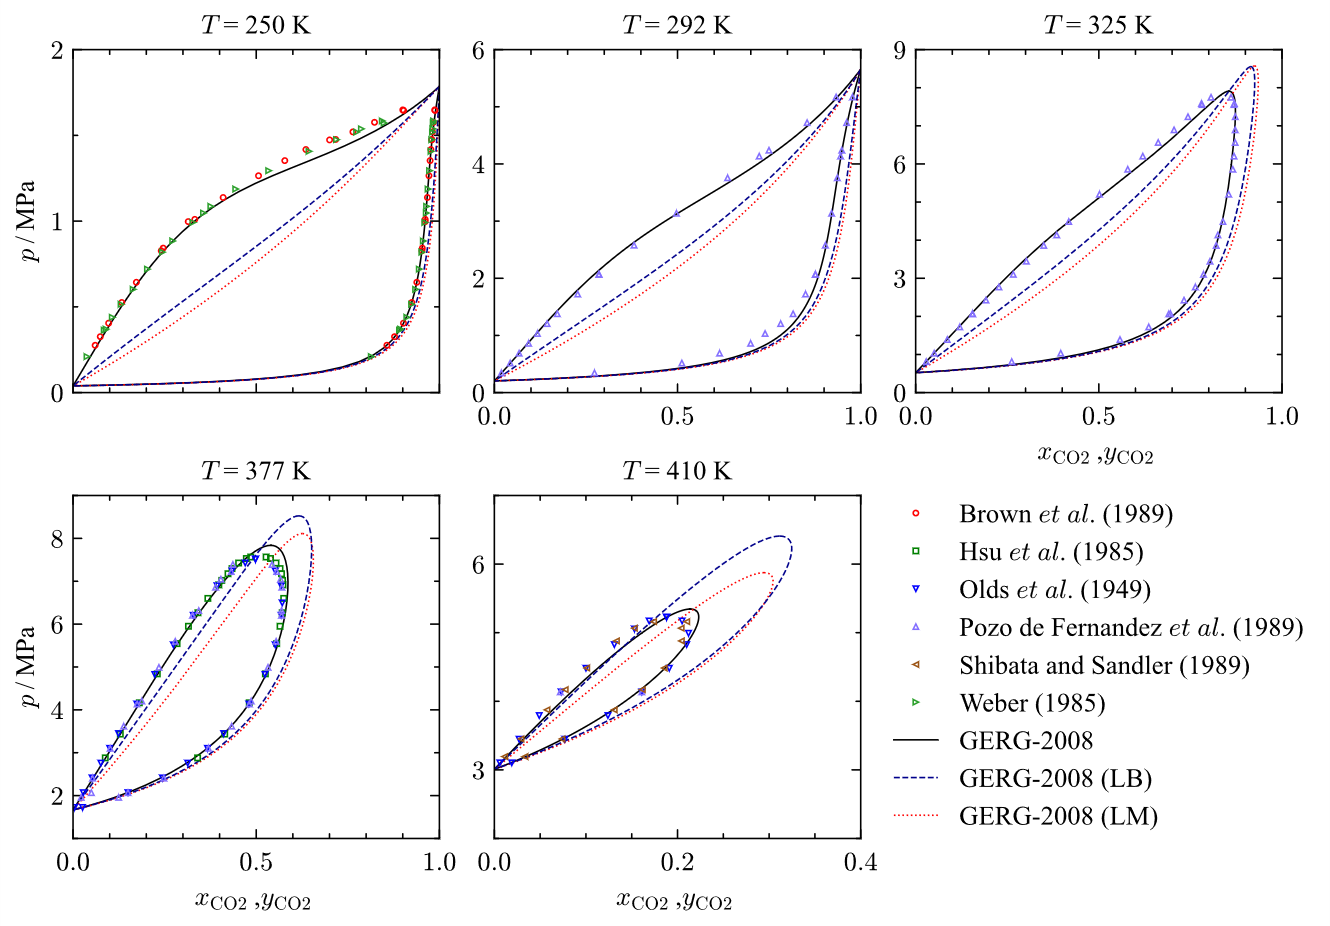


Figure S 20: *p,x*-diagrams representing selected experimental data [13–18] of vapor-liquid-equilibria (VLE) for the binary system CO2 + C4H10 at 250 K, 292 K, 325 K, 377 K and 410 K in comparison to VLEs calculated with the original GERG-2008 model [1] and modified model versions using the linear mixing rule (LM) and the Lorent-Berthelot mixing rule (LB).

The impact of the interaction parameter on the calculated vapor-liquid-equilibria is apparent (see Figure S 21). The overall best representation of the experimental VLE data is obtained using the average interaction parameter, while the results simultaneously indicate a clear temperature dependence of the interaction parameter.


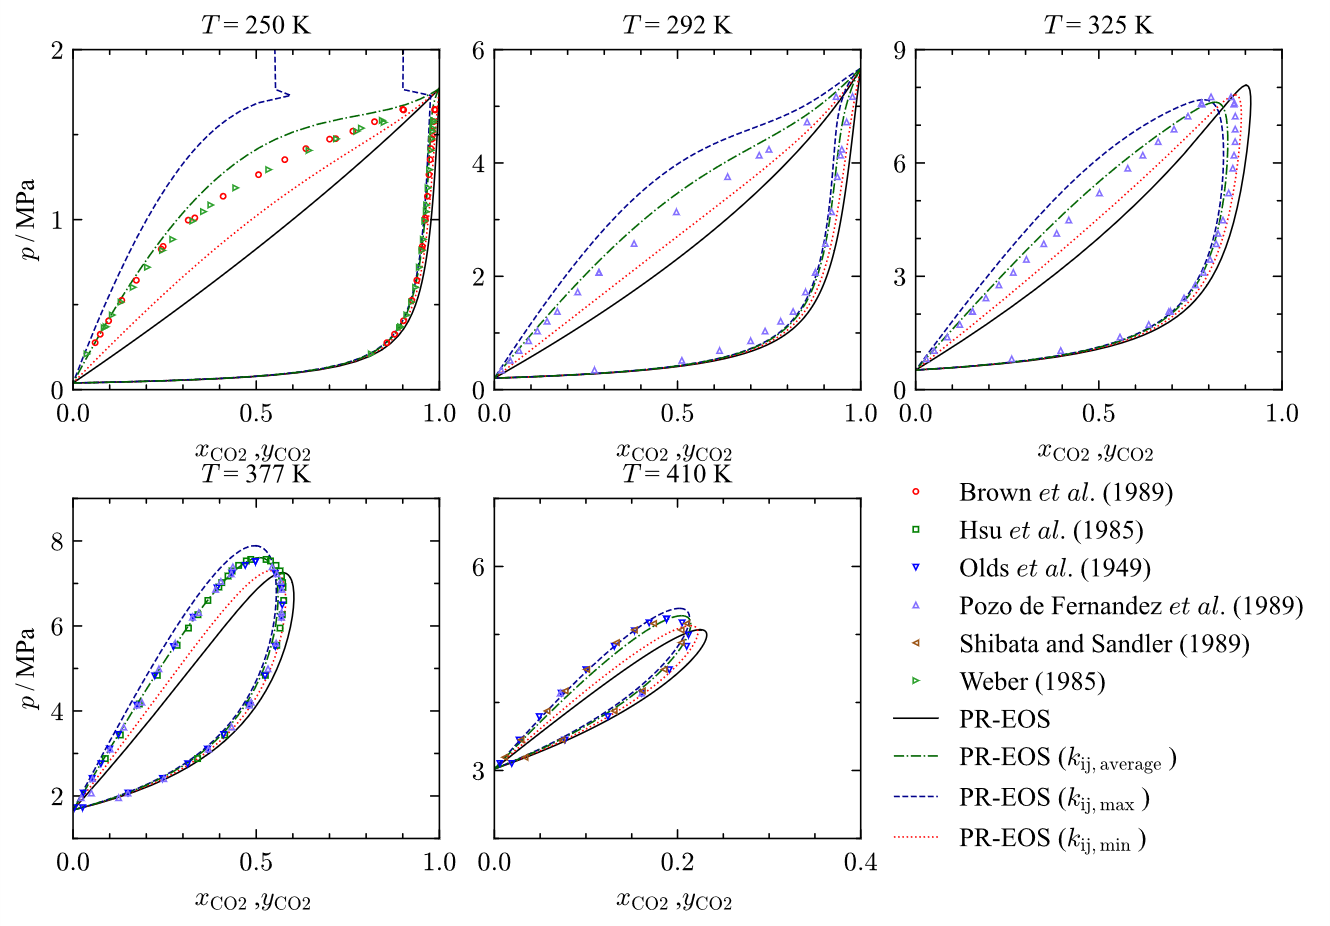


Figure S 21: *p,x*-diagrams representing selected experimental data [13–18] of vapor-liquid-equilibria (VLE) for the binary system CO2 + C4H10 at 250 K, 292 K, 325 K, 377 K and 410 K in comparison to VLEs calculated using the PR‑EOS [19] with different interaction parameters *k*ij from Table 6.

## Characteristic values

Table S 1: Overview of the characteristic values from Span and Wagner [20] of all components, CO2 mixtures and mixture models considered.

|  | ***θ*B,*θ*I** | ***θ*JT** | ***θ*J** | **δB |*T=Tc*** | **δI |*T=Tc*** | ***π*max,JT** | ***θ*max,JT** |
| --- | --- | --- | --- | --- | --- | --- | --- |
| *Predicted for pure fluids* [20]: | *2.66* | *5* | *19.5* | *1.435* | *2.2235* | *11.8* | *2.25* |
| system | **GERG-2008 [1]** | | | | | | |
| CO2 | 2.3511 | 4.4533 | 89.7040 | 1.4410 | 2.2309 | 12.5290 | 1.9377 |
| C1 | 2.6720 | 4.9894 | 22.2147 | 1.4277 | 2.2032 | 11.8196 | 2.2643 |
| C2 | 2.4830 | 4.6213 | 20.4638 | 1.4303 | 2.1940 | 12.1023 | 2.1125 |
| C3 | 2.4215 | 4.4967 | 14.6510 | 1.4336 | 2.1947 | 12.0989 | 2.0563 |
| C4 | 2.3658 | 4.3884 | 14.3410 | 1.4448 | 2.2013 | 12.3293 | 1.9995 |
| C5 | 2.3564 | 4.3732 | 14.3829 | 1.4435 | 2.1991 | 12.7175 | 1.9606 |
| C6 | 2.2067 | 4.0490 | 13.0851 | 1.4643 | 2.2114 | 13.0722 | 1.9699 |
| C7 | 2.2191 | 4.0683 | 13.1894 | 1.4549 | 2.2373 | 13.4027 | 1.9559 |
| C8 | 2.1093 | 3.8314 | 12.1951 | 1.4340 | 2.2170 | 13.8698 | 1.9281 |
| C9 | 2.1368 | 3.8993 | 12.6051 | 1.4681 | 2.2297 | 14.1518 | 1.9077 |
| C10 | 2.1351 | 3.8643 | 12.3639 | 1.4442 | 2.2136 | 14.6909 | 1.9706 |
|  | **recommended EOS (TREND 6 [21]), used in This work [2, 4–12]** | | | | | | |
| CO2 | 2.3744 | 4.4513 | 26.5436 | 1.4415 | 2.2318 | 12.5362 | 1.9369 |
| C1 | 2.6697 | + | + | 1.4278 | 2.2028 | 5.3000 | + |
| C2 | 2.5057 | 4.5365 | 14.0155 | 1.4341 | 2.1999 | 12.0777 | 2.1100 |
| C3 | 2.3588 | 4.3494 | 14.0677 | 1.4354 | 2.1953 | 12.1050 | 2.0598 |
| C4 | 2.1953 | 3.9444 | 9.5370 | 1.4472 | 2.2021 | 12.8618 | 1.9704 |
| C5 | 2.1570 | 4.0052 | 11.6686 | 1.4474 | 2.2063 | 12.9816 | 2.0125 |
| C6 | 2.0984 | 3.8794 | 11.1520 | 1.4441 | 2.2091 | 13.6075 | 1.9001 |
| C7 | 1.9881 | 3.6499 | 13.1122 | 1.4525 | 2.2193 | 14.3209 | 1.8565 |
| C8 | 2.0886 | 3.8131 | 13.3792 | 1.4574 | 2.2283 | 13.9759 | 1.8530 |
| C9 | 2.1368 | 3.8993 | 12.6051 | 1.4681 | 2.2297 | 14.1518 | 1.9077 |
| C10 | 2.1351 | 3.8643 | 12.3639 | 1.4442 | 2.2136 | 14.6909 | 1.9706 |
|  | **new CO2-EOS [3]** | | | | | | |
| CO2 | 2.344 | 4.3083 | 19.6385 | 1.4409 | 2.2307 | 12.2759 | 1.9833 |

**Table 7 continued**

|  | **Peng-Robinson EOS [19]** | | | | | | |
| --- | --- | --- | --- | --- | --- | --- | --- |
| CO2 | 2.3256 | 3.8396 | 5.8336 | 1.5602 | 2.7981 | 13.6491 | 1.8711 |
| C1 | 2.9952 | 5.3550 | 12.6295 | 1.5602 | 2.7982 | 13.0850 | 2.3188 |
| C2 | 2.6435 | 4.5613 | 8.4131 | 1.5601 | 2.7982 | 13.2742 | 2.0701 |
| C3 | 2.4921 | 4.2180 | 7.0695 | 1.5601 | 2.7982 | 13.4194 | 1.9647 |
| C4 | 2.3743 | 3.9503 | 6.1716 | 1.5601 | 2.7982 | 13.5732 | 1.8983 |
| C5 | 2.2731 | 3.7201 | 5.4885 | 1.5601 | 2.7982 | 13.7394 | 1.8506 |
| C6 | 2.1902 | 3.5314 | 4.9821 | 1.5601 | 2.7982 | 13.9080 | 1.7951 |
| C7 | - | - | - | - | - | - | - |
| C8 | - | - | - | - | - | - | - |
| C9 | - | - | - | - | - | - | - |
| C10 | - | - | - | - | - | - | - |
|  | **GERG-2008 [1]** | | | | | | |
| CO2+C1 | 2.6369 - 2.3809 | 4.9323 - 4.5045 | 24.0468 - 145.7370 | 1.4161 - (1.3966) - 1.4270 | 2.1981 - (2.1937) - 2.2203 | 11.7006 - (11.5956) - 12.2363 | 2.2610 - 1.9924 |
| CO2+C2 | 2.4691 - 2.3633 | 4.6038 - 4.4696 | 22.9289 - 134.9980 | 1.4312 - 1.4399 | 2.1975 - 2.2269 | 12.1365 - 12.4770 | 2.0969 - 1.9466 |
| CO2+C3 | 2.4144 - 2.3580 | 4.4926 - 4.4580 | 15.6304 - 90.7700 | 1.4343 - 1.4408 | 2.1981 - 2.2270 | 12.1362 - 12.4806 | 2.0333 - (1.9412) - 1.9646 |
| CO2+C4 | 2.3643 - 2.3525 | 4.3945 - 4.4464 | 15.3037 - 89.4285 | 1.4444 - 1.4416 | 2.2040 - 2.2277 | 12.3445 - 12.5021 | 1.9981 - 1.9332 |
| CO2+C5 | 2.3559 - 2.3516 | 4.3805 - 4.4445 | 15.3217 - 87.5162 | 1.4433 - 1.4416 | 2.2020 - 2.2273 | 12.6922 - 12.5392 | 1.9754 - 1.9307 |
| CO2+C6 | 2.2204 - 2.3359 | 4.0856 - 4.4088 | 14.0505 - 85.2604 | 1.4618 - 1.4438 | 2.2132 - 2.2287 | 13.0113 - 12.5736 | 1.9991 - (1.9635) - 1.9806 |
| CO2+C7 | 2.2316 - 2.3372 | 4.1033 - 4.4111 | 14.1596 - 84.7979 | 1.4532 - 1.4422 | 2.2367 - 2.2316 | 13.3085 - 12.6097 | 1.9619 - (1.9629) - 1.9508 |
| CO2+C8 | 2.1309 - 2.3242 | 3.8851 - 4.3819 | 13.1375 - 83.8218 | 1.4349 - 1.4410 | 2.2182 - 2.2293 | 13.7221 - 12.6471 | 1.9357 - 1.9707 |
| CO2+C9 | 2.1557 - 2.3270 | 3.9465 - 4.3888 | 13.5235 - 81.9127 | 1.4650 - 1.4441 | 2.2298 - 2.2308 | 13.9693 - 12.6685 | 1.8958 - 1.9760 |
| CO2+C10 | 2.1546 - 2.3274 | 3.9163 - 4.3873 | 13.3387 - 81.7846 | 1.4440 - (1.4417) - 1.4422 | 2.2151 - 2.2289 | 14.4477 - 12.7110 | 1.9587 - (1.9490) - 1.9868 |
|  | **GERG-2008, ref.CO2 [1, 2]** | | | | | | |
| CO2+C1 | 2.6405 - 2.4029 | 4.9321 - 4.5026 | 22.5798 - 27.8621 | 1.4162 - (1.3970) - 1.4274 | 2.1982 - (2.1939) - 2.2211 | 11.696 - (11.588) - 12.236 | 2.2603 - 1.9911 |
| CO2+C2 | 2.4719 - 2.3847 | 4.6036 - 4.4677 | 20.9158 - 25.0363 | 1.4314 - 1.4404 | 2.1975 - 2.2277 | 12.1350 - 12.4825 | 2.0966 - 1.9458 |
| CO2+C3 | 2.4169 - 2.3791 | 4.4924 - 4.4561 | 15.1770 - 23.8276 | 1.4343 - 1.4412 | 2.1981 - 2.2278 | 12.1355 - 12.4836 | 2.0331 - (1.9405) - 1.9636 |
| CO2+C4 | 2.3666 - 2.3735 | 4.3943 - 4.4445 | 14.8714 - 23.7222 | 1.4444 - 1.4419 | 2.2041 - 2.2284 | 12.3442 - 12.5090 | 1.9979 - 1.9325 |
| CO2+C5 | 2.3581 - 2.3725 | 4.3803 - 4.4427 | 14.8989 - 23.6198 | 1.4433 - 1.4418 | 2.2020 - 2.2281 | 12.6922 - 12.5462 | 1.9752 - 1.9301 |
| CO2+C6 | 2.2222 - 2.3564 | 4.0854 - 4.4069 | 13.6692 - 23.2482 | 1.4618 - 1.4440 | 2.2132 - 2.2295 | 13.0111 - 12.5781 | 1.9989 - 1.9161 |
| CO2+C7 | 2.2335 - 2.3577 | 4.1031 - 4.4092 | 13.7720 - 23.3692 | 1.4532 - 1.4427 | 2.2368 - 2.2324 | 13.3088 - 12.6144 | 1.9618 - (1.9624) - 1.9499 |
| CO2+C8 | 2.1325 - 2.3444 | 3.8849 - 4.3800 | 12.8015 - 23.1776 | 1.4349 - 1.4415 | 2.2183 - 2.2301 | 13.7227 - 12.6493 | 1.9356 - (1.9319) - 1.9696 |
| CO2+C9 | 2.1573 - 2.3471 | 3.9463 - 4.3869 | 13.1807 - 24.3708 | 1.4650 - 1.4445 | 2.2299 - 2.2316 | 13.9704 - 12.6747 | 1.8958 - (1.9294) - 1.9070 |
| CO2+C10 | 2.1563 - 2.3476 | 3.9161 - 4.3854 | 12.9835 - 24.2708 | 1.4440 - (1.4420) - 1.4426 | 2.2152 - 2.2297 | 14.4481 - 12.7187 | 1.9586 - 1.9133 |

**Table 7 continued**

|  | **GERG-2008, new CO2 [1, 3]** | | | | | | |
| --- | --- | --- | --- | --- | --- | --- | --- |
| CO2+C1 | 2.6368 - 2.3748 | 4.9154 - 4.3715 | 21.9412 - 20.1436 | 1.4161 - (1.3966) - 1.4270 | 2.1981 - (2.1937) - 2.2202 | 11.6843 - (11.5194) - 12.0192 | 2.2606 - 2.0424 |
| CO2+C2 | 2.4686 - 2.3571 | 4.5885 - 4.3381 | 20.3885 - (19.8555) - 19.9215 | 1.4313 - 1.4398 | 2.1975 - 2.2268 | 12.1155 - 12.2541 | 2.0959 - 1.9962 |
| CO2+C3 | 2.4138 - 2.3517 | 4.4787 - 4.3279 | 14.9500 - 18.8447 | 1.4342 - 1.4408 | 2.1981 - 2.2269 | 12.1150 - 12.2542 | 2.0323-(2.0004)-(2.0467)-2.0166 |
| CO2+C4 | 2.3636 - 2.3462 | 4.3809 - 4.3168 | 14.6527 - 18.7804 | 1.4444 - 1.4415 | 2.2040 - 2.2275 | 12.3224 - 12.2796 | 1.9970-(1.9664)-(2.0081)-1.9859 |
| CO2+C5 | 2.3552 - 2.3453 | 4.3672 - 4.3153 | 14.6849 - 18.7684 | 1.4433 - 1.4415 | 2.2020 - 2.2272 | 12.6698 - 12.3162 | 1.9743-(1.9681)-(2.0040)-1.9845 |
| CO2+C6 | 2.2196 - 2.3294 | 4.0728 - 4.2800 | 13.4670 - 18.5699 | 1.4618 - 1.4437 | 2.2132 - 2.2286 | 12.9891 - 12.3501 | 1.9981 - 1.9692 |
| CO2+C7 | 2.2308 - 2.3307 | 4.0905 - 4.2822 | 13.5674 - 18.5916 | 1.4532 - 1.4421 | 2.2367 - 2.2315 | 13.2842 - 12.3806 | 1.9608 - (1.9505) - 2.0073 |
| CO2+C8 | 2.1301 - 2.3177 | 3.8734 - 4.2541 | 12.6153 - 18.3934 | 1.4349 - 1.4410 | 2.2182 - 2.2292 | 13.6974 - 12.4202 | 1.9346 - (1.9713) - 1.9592 |
| CO2+C9 | 2.1550 - 2.3204 | 3.9347 - 4.2611 | 12.9942 - 18.4369 | 1.4650 - 1.4441 | 2.2298 - 2.2306 | 13.9437 - 12.4444 | 1.8947 -1.9648 |
| CO2+C10 | 2.1539 - 2.3208 | 3.9042 - 4.2590 | 12.7888 - 18.4560 | 1.4440 - (1.4416) - 1.4422 | 2.2151 - 2.2288 | 14.4240 - 12.4910 | 1.9578-(1.9465)-(1.9792)-1.9759 |
|  | **GERG-2008, new CO2 [1, 3], linear mixing rule** | | | | | | |
| CO2+C1 | 2.6335 - 2.3717 | 4.9110 - 4.3669 | 21.9378 - 20.1266 | 1.4292 - 1.4397 | 2.2059 - 2.2280 | 11.8403 - 12.2037 | 2.2591- (2.0424) - 2.0429 |
| CO2+C2 | 2.4686 - 2.3571 | 4.5885 - 4.3381 | 20.3885 - 19.7322 | 1.4313 - 1.4401 | 2.1975 - 2.2268 | 12.1154 - 12.2541 | 2.1020 - 2.0026 |
| CO2+C3 | 2.4138 - 2.3517 | 4.4787 - 4.3279 | 14.9500 - 18.8447 | 1.4342 - 1.4408 | 2.1981 - 2.2269 | 12.1150 - 12.2539 | 2.0318-(2.0025)-(2.0474)-2.0182 |
| CO2+C4 | 2.3636 - 2.3462 | 4.3809 - 4.3168 | 14.6527 - 18.7804 | 1.4444 - 1.4417 | 2.2040 - 2.2275 | 12.3223 - 12.2794 | 2.0075 - 1.9799 |
| CO2+C5 | 2.3552 - 2.3453 | 4.3672 - 4.3153 | 14.6849 - 18.7684 | 1.4432 - 1.4417 | 2.2020 - 2.2272 | 12.6699 - 12.3131 | 1.9683 - (1.9481) - 2.0132 |
| CO2+C6 | 2.2196 - 2.3294 | 4.0728 - 4.2800 | 13.4670 - 18.5699 | 1.4617 - 1.4436 | 2.2132 - 2.2286 | 12.9884 - 12.3513 | 1.9714 - (2.0028) - 1.9856 |
| CO2+C7 | 2.2308 - 2.3307 | 4.0905 - 4.2822 | 13.5674 - 18.5916 | 1.4532 - 1.4427 | 2.2367 - 2.2315 | 13.2833 - 12.3798 | 1.9508 - (1.9858) - 1.9569 |
| CO2+C8 | 2.1301 - 2.3177 | 3.8734 - 4.2541 | 12.6153 - 18.3934 | 1.4347 - 1.4402 | 2.2182 - 2.2292 | 13.6971 - 12.4173 | 1.9613 - (1.9495) - 2.0162 |
| CO2+C9 | 2.1550 - 2.3204 | 3.9347 - 4.2611 | 12.9942 - 18.4369 | 1.4650 - 1.4441 | 2.2298 - 2.2306 | 13.9440 - 12.4438 | 1.9362 - (1.9148) - 1.9932 |
| CO2+C10 | 2.1539 - 2.3208 | 3.9042 - 4.2590 | 12.7888 - 18.4560 | 1.4442 - (1.4417) - 1.4423 | 2.2151 - 2.2288 | 14.4229 - 12.4909 | 1.9421 - 1.9898 |
|  | **GERG-2008, new CO2 [1, 3], Lorentz-Berthelot mixing rule** | | | | | | |
| CO2+C1 | 2.6373 - 2.3998 | 4.9278 - 4.4982 | 22.5764 - 27.8441 | 1.4293 - 1.4401 | 2.2060 - 2.2289 | 11.8524 - 12.4284 | 2.2589 - (1.9888) - 1.9921 |
| CO2+C2 | 2.4719 - 2.3847 | 4.6036 - 4.4677 | 20.9158 - 27.3899 | 1.4315 - 1.4407 | 2.1976 - 2.2277 | 12.1338 - 12.4825 | 2.1076 - 1.9587 |
| CO2+C3 | 2.4169 - 2.3791 | 4.4924 - 4.4561 | 15.1770 - 23.6551 | 1.4343 - 1.4408 | 2.1981 - 2.2278 | 12.1349 - 12.4830 | 2.0189 - (2.0190) - 1.9261 |
| CO2+C4 | 2.3666 - 2.3735 | 4.3943 - 4.4445 | 14.8714 - 23.5696 | 1.4445 - 1.4424 | 2.2041 - 2.2284 | 12.3442 - 12.5061 | 1.9980 - (1.9377) - 1.9687 |
| CO2+C5 | 2.3581 - 2.3725 | 4.3803 - 4.4427 | 14.8989 - 23.5537 | 1.4433 - 1.4422 | 2.2020 - 2.2281 | 12.6927 - 12.5453 | 1.9617 - (1.9162) - 1.9570 |
| CO2+C6 | 2.2222 - 2.3564 | 4.0854 - 4.4069 | 13.6692 - 23.3533 | 1.4618 - 1.4440 | 2.2133 - 2.2295 | 13.0112 - 12.5811 | 1.9669-(1.9183)-(1.9871)-1.9519 |
| CO2+C7 | 2.2335 - 2.3577 | 4.1031 - 4.4092 | 13.7720 - 23.4073 | 1.4532 - 1.4425 | 2.2368 - 2.2324 | 13.3080 - 12.6146 | 1.9484-(1.9311)-(1.9664)-1.9481 |
| CO2+C8 | 2.1325 - 2.3444 | 3.8849 - 4.3800 | 12.8015 - 23.1783 | 1.4347 - 1.4411 | 2.2183 - 2.2301 | 13.7215 - 12.6530 | 1.9596 - (1.9272) - 1.9554 |
| CO2+C9 | 2.1573 - 2.3471 | 3.9463 - 4.3869 | 13.1807 - 23.2460 | 1.4650 - 1.4442 | 2.2299 - 2.2316 | 13.9694 - 12.6760 | 1.8910 - 1.9563 |
| CO2+C10 | 2.1563 - 2.3476 | 3.9161 - 4.3854 | 12.9835 - 23.3343 | 1.4442 - (1.4420) - 1.4425 | 2.2152 - 2.2297 | 14.4477 - 12.7169 | 1.9420 - (1.9338) - 1.9716 |

**Table 7 continued**

|  | **This work** | | | | | | |
| --- | --- | --- | --- | --- | --- | --- | --- |
| CO2+C1 | 2.6375 - 2.4012 | + | + | 1.4339 - (1.4494) - 1.4458 | 2.2193 - (2.2566) - 2.2430 | 5.4777 - (5.5196) - 0.5396 | + | |
| CO2+C2 | 2.4925 - 2.3874 | 4.5305 - 4.4621 | 14.7281 - 24.0613 | 1.4386 - (1.4487) - 1.4446 | 2.2132 - (2.2464) - 2.2395 | 12.2523 - (12.7015) - 12.6222 | 2.1136 - 1.9438 | |
| CO2+C3 | 2.3645-(2.3795)-2.3772 | 4.3687 - 4.4514 | 14.6438 - 23.7451 | 1.4539 - (1.5120) - 1.4606 | 2.2407 - (2.3432) - 2.2748 | 12.7151 - (14.1219) - 13.0979 | 2.0764 - (2.0980) - 1.9715 | |
| CO2+C4 | 2.2177 - 2.3622 | 4.0016 - 4.4109 | 10.0979 - 21.9239 | 1.4868 - (1.7016) - 1.4811 | 2.2798 - (2.4507) - 2.3115 | 13.9265 - (16.4390) - 13.6704 | 2.0313 - (2.0961) - 2.0151 | |
| CO2+C5 | 2.1800 - 2.3553 | 4.0524 - 4.4124 | 12.1770 - 22.5610 | 1.4982 - (1.8305) - 1.4902 | 2.2956 - (2.4917) - 2.3271 | 14.1985 - (17.2411) - 13.8915 | 2.0675 - (2.1169) - 1.9764 | |
|  | **This work (2)** | | | | | | |
| CO2+C1 | 2.5976 - 2.3714 | + | + | 1.4216 - (1.4130) - 1.4325 | 2.2117 - (2.2405) - 2.2363 | 5.2360 - 0.5095 | + | |
| CO2+C2 | 2.4857 - 2.3816 | 4.5157 - 4.4484 | 14.6811 - 23.9716 | 1.4336 - (1.4327) - 1.4395 | 2.2038 - 2.2296 | 12.0557 - (12.0498) - 12.4126 | 2.1035 - 1.9512 | |
| CO2+C3 | 2.3580-(2.3576)-2.3702 | 4.3534 - 4.4341 | 14.5743 - 23.5706 | 1.4353 - 1.4408 | 2.1991 - 2.2284 | 12.1048 - 12.4466 | 2.0548 - (1.9432) - 1.9684 | |
| CO2+C4 | 2.2046 - 2.3460 | 3.9718 - 4.3714 | 10.0158 - 21.5408 | 1.4441 - (1.4374) - 1.4396 | 2.2066 - 2.2309 | 12.6920 - (12.3356) - 12.4328 | 1.9981 - (2.0042) - 1.9552 | |
| CO2+C5 | 2.1454-(2.1397)-2.3049 | 3.9708-(3.9457)-4.2923 | 11.9641 - 21.7580 | 1.4339 - (1.4049) - 1.4298 | 2.2181 - (2.2547) - 2.2415 | 12.2745 - (11.3486) - 11.9555 | 2.0949 - (2.2157) - 2.0156 | |
|  | **recommended EOS (TREND 6 [21])  [2, 4–12]** | | | | | | |
| CO2+C1 | 2.6388 - 2.4029 | + | + | 1.4163 - (1.3972) - 1.4274 | 2.1979 - (2.1936) - 2.2210 | 5.3949 - 0.5160 | + | |
| CO2+C2 | 2.4912 - 2.3863 | 4.5275 - 4.4593 | 14.7095 - 24.0187 | 1.4347 - 1.4407 | 2.2029 - 2.2284 | 12.1136 - 12.4812 | 2.0944 - 1.9456 | |
| CO2+C3 | 2.3603 - 2.3727 | 4.3586 - 4.4400 | 14.5859 - 23.5975 | 1.4360 - 1.4414 | 2.1986 - 2.2278 | 12.1401 - 12.4848 | 2.0361 - (1.9416) - 1.9640 | |
| CO2+C4 | 2.2116 - 2.3547 | 3.9871 - 4.3917 | 10.0418 - 21.6343 | 1.4466 - 1.4421 | 2.2048 - 2.2286 | 12.8281 - 12.5675 | 1.9672 - (1.9840) - 1.9364 | |
| CO2+C5 | 2.1740 - 2.3467 | 4.0375 - 4.3903 | 12.1034 - 22.2389 | 1.4468 - 1.4422 | 2.2086 - 2.2290 | 12.9316 - 12.5749 | 1.9899 - 1.9316 | |
| CO2+C6 | 2.1184 - 2.3364 | 3.9173 - 4.3664 | 11.5802 - 21.9348 | 1.4439 - 1.4422 | 2.2111 - 2.2293 | 13.4965 - 12.6374 | 1.8973 - (1.9237) - 1.9174 | |
| CO2+C7 | 2.0137 - 2.3171 | 3.7005 - 4.3278 | 13.6106 - 23.0648 | 1.4513 - 1.4428 | 2.2205 - 2.2304 | 14.1327 - 12.7025 | 1.8651 - 1.9541 | |
| CO2+C8 | 2.1091 - 2.3351 | 3.8575 - 4.3613 | 13.8874 - 23.2348 | 1.4557 - 1.4435 | 2.2286 - 2.2314 | 13.8182 - 12.6611 | 1.8642 - 1.9622 | |
| CO2+C9 | 2.1573 - 2.3471 | 3.9463 - 4.3869 | 13.1807 - 24.3710 | 1.4650 - 1.4445 | 2.2299 - 2.2316 | 13.9704 - 12.6747 | 1.8958 - (1.9294) - 1.9070 | |
| CO2+C10 | 2.1563 - 2.3476 | 3.9161 - 4.3854 | 12.9835 - 24.2710 | 1.4440 - (1.4420) - 1.4426 | 2.2152 - 2.2297 | 14.4481 - 12.7187 | 1.9586 - 1.9133 | |
|  | **recommended EOS (TREND 6 [21])  [2, 4–12], linear mixing rule** | | | | | | |
| CO2+C1 | 2.6356 - 2.3998 | + | + | 1.4294 - 1.4401 | 2.2057 - 2.2288 | 5.4199 - 0.5205 | + | |
| CO2+C2 | 2.4912 - 2.3863 | 4.5275 - 4.4593 | 14.7095 - 23.8487 | 1.4349 - 1.4410 | 2.2029 - 2.2284 | 12.1128 - 12.4814 | 2.1003 - 1.9518 | |
| CO2+C3 | 2.3603 - 2.3727 | 4.3586 - 4.4400 | 14.5859 - 23.4405 | 1.4360 - 1.4414 | 2.1986 - 2.2278 | 12.1401 - 12.4845 | 2.0356 - (1.9436) - 1.9656 | |
| CO2+C4 | 2.2116 - 2.3547 | 3.9871 - 4.3917 | 10.0418 - 21.6220 | 1.4465 - 1.4422 | 2.2049 - 2.2286 | 12.8287 - 12.5669 | 1.9789 - 1.9306 | |
| CO2+C5 | 2.1740 - 2.3467 | 4.0375 - 4.3903 | 12.1034 - 22.1941 | 1.4468 - 1.4426 | 2.2086 - 2.2290 | 12.9313 - 12.5740 | 1.9838-(1.9548) -(1.9956)-1.9583 | |
| CO2+C6 | 2.1184 - 2.3364 | 3.9173 - 4.3664 | 11.5802 - 21.9608 | 1.4440 - 1.4422 | 2.2111 - 2.2293 | 13.4953 - 12.6386 | 1.9055-(1.8848)-(1.9334)-1.9296 | |
| CO2+C7 | 2.0137 - 2.3171 | 3.7005 - 4.3278 | 13.6106 - 23.1324 | 1.4513 - 1.4432 | 2.2205 - 2.2304 | 14.1321 - 12.7016 | 1.8949 - (1.9269) - 1.9049 | |
| CO2+C8 | 2.1091 - 2.3351 | 3.8575 - 4.3613 | 13.8874 - 23.2984 | 1.4556 - 1.4430 | 2.2286 - 2.2314 | 13.8163 - 12.6652 | 1.8888 - (1.8846) - 1.9449 | |
| CO2+C9 | 2.1573 - 2.3471 | 3.9463 - 4.3869 | 13.1807 - 23.3446 | 1.4650 - 1.4443 | 2.2299 - 2.2315 | 13.9695 - 12.6786 | 1.8918 - 1.9307 | |
| CO2+C10 | 2.1563 - 2.3476 | 3.9161 - 4.3854 | 12.9835 - 23.4730 | 1.4442 - (1.4420) - 1.4425 | 2.2152 - 2.2297 | 14.4478 - 12.7213 | 1.9429 - (1.9579) - 1.9255 | |

**Table 7 continued**

|  | **recommended EOS (TREND 6 [21])  [2, 4–12], Lorentz Berthelot mixing rule** | | | | | | | | | | | | | | | | | | |
| --- | --- | --- | --- | --- | --- | --- | --- | --- | --- | --- | --- | --- | --- | --- | --- | --- | --- | --- | --- |
| CO2+C1 | 2.6356 - 2.3998 | + | + | | | 1.4294 - 1.4401 | | | 2.2057 - 2.2288 | | | 5.4176 - 0.5226 | | | + | | |
| CO2+C2 | 2.4912 - 2.3863 | 4.5275 - 4.4593 | 14.7095 - 23.8449 | | | 1.4349 - 1.4411 | | | 2.2030 - 2.2284 | | | 12.1120 - 12.4812 | | | 2.1053 - (1.9420) - 1.9584 | | |
| CO2+C3 | 2.3603 - 2.3727 | 4.3586 - 4.4400 | 14.5859 - 23.4366 | | | 1.4360 - 1.4410 | | | 2.1986 - 2.2278 | | | 12.1399 - 12.4848 | | | 2.0484 - 1.9265 | | |
| CO2+C4 | 2.2116 - 2.3547 | 3.9871 - 4.3917 | 10.0418 - 21.5775 | | | 1.4466 - 1.4426 | | | 2.2049 - 2.2286 | | | 12.8283 - 12.5629 | | | 1.9691-(1.9471)-(1.9811)-1.9725 | | |
| CO2+C5 | 2.1740 - 2.3467 | 4.0375 - 4.3903 | 12.1034 - 22.2044 | | | 1.4468 - 1.4426 | | | 2.2086 - 2.2290 | | | 12.9307 - 12.5740 | | | 2.0101 - (1.9202) - 1.9586 | | |
| CO2+C6 | 2.1184 - 2.3364 | 3.9173 - 4.3664 | 11.5802 - 21.9718 | | | 1.4439 - 1.4421 | | | 2.2111 - 2.2293 | | | 13.4960 - 12.6364 | | | 1.9012 - (1.8945) - 1.9528 | | |
| CO2+C7 | 2.0137 - 2.3171 | 3.7005 - 4.3278 | 13.6106 - 23.0970 | | | 1.4513 - 1.4427 | | | 2.2205 - 2.2304 | | | 14.1326 - 12.7030 | | | 1.8924 - (1.8806) - 1.9523 | | |
| CO2+C8 | 2.1091 - 2.3351 | 3.8575 - 4.3613 | 13.8874 - 23.2346 | | | 1.4556 - 1.4430 | | | 2.2286 - 2.2314 | | | 13.8166 - 12.6646 | | | 1.8872 - (1.8694) - 1.9482 | | |
| CO2+C9 | 2.1573 - 2.3471 | 3.9463 - 4.3869 | 13.1807 - 23.2460 | | | 1.4650 - 1.4442 | | | 2.2299 - 2.2316 | | | 13.9694 - 12.6760 | | | 1.8910 - 1.9563 | | |
| CO2+C10 | 2.1563 - 2.3476 | 3.9161 - 4.3854 | 12.9835 - 23.3344 | | | 1.4442 - (1.4420) - 1.4425 | | | 2.2152 - 2.2297 | | | 14.4477 - 12.7169 | | | 1.9420 - (1.9338) - 1.9716 | | |
|  | **Peng-Robinson EOS (*k*ij = 0) [19], absolute values** | | | | | | | | | | | | | | | | | | |
| CO2+C1 | 588.176-696.670 | 1042.70-1158.77 | | | 12153.5-1774.19 | | | - | | | - | | | 199.475-(198.899)-(199.638)-199.167 | | | 473.4172 - 649.4324 | | | |
| CO2+C2 | 796.009-716.021 | 1368.57-1188.63 | | | 2568.71-1774.19 | | | - | | | - | | | 199.244 - (198.998) - 199.589 | | | 614.7742-(588.5118)-644.5654 | | | |
| CO2+C3 | 900.732-728.530 | 1522.81-1208.51 | | | 2614.93-1774.19 | | | - | | | - | | | 199.412-(199.013)-(199.456)-199.356 | | | 699.3236-(601.2510)-627.5553 | | | |
| CO2+C4 | 982.519-740.353 | 1635.85-1227.05 | | | 2623.71-1774.19 | | | - | | | - | | | 198.337 - (199.862) - 198.788 | | | 758.6986 - 608.6796 | | | |
| CO2+C5 | 1038.25-750.134 | 1702.94-1241.95 | | | 2577.93-1774.19 | | | - | | | - | | | 198.430 - (199.667) - 198.780 | | | 796.0194-594.1974 | | | |
| CO2+C6 | 1081.48-758.991 | 1749.67-1255.12 | | | 2530.02-1774.19 | | | - | | | - | | | 199.043-(198.823)-(199.841)-199.700 | | | 810.0676 - 599.1440 | | | |
| CO2+C7 | - | - | | | - | | | - | | | - | | | - | | | - | | | |
| CO2+C8 | - | - | | | - | | | - | | | - | | | - | | | - | | | |
| CO2+C9 | - | - | | | - | | | - | | | - | | | - | | | - | | | |
| CO2+C10 | - | - | | | - | | | - | | | - | | | - | | | - | | | |
|  | **Peng-Robinson EOS (*k*ij = 0) [19], normalized with critical values** | | | | | | | | | | | | | | | | | | |
| CO2+C1 | 2.8350 - 2.3459 | 5.0257 - 3.9019 | | 11.6003 - 5.9741 | | | 1.2759 - (1.1514) - 1.4147 | | | 2.3047 - (2.0892) - 2.5479 | | | 11.2223 - (9.6983) - 12.0918 | | | 2.2818 - (2.1766) - 2.1868 | | |
| CO2+C2 | 2.6119 - 2.3589 | 4.4907 - 3.9159 | | 8.4287 - 5.8450 | | | 1.4938 - (1.4992) - 1.4962 | | | 2.6799 - (2.6904) - 2.6839 | | | 13.2430-(13.2273)-(13.3942)-13.2540 | | | 2.0563 - (1.9729) - 2.1235 | | |
| CO2+C3 | 2.4647 - 2.3289 | 4.1668 - 3.8632 | | 7.1552 - 5.6715 | | | 1.4738 - (1.4256) - 1.4632 | | | 2.6506 - (2.5810) - 2.6352 | | | 12.7843 - (11.4533) - 12.5364 | | | 1.9598 - (1.8636) - 2.0061 | | |
| CO2+C4 | 2.3431 - 2.2753 | 3.9012 - 3.7710 | | 6.2571 - 5.4524 | | | 1.4526 - (1.2989) - 1.3619 | | | 2.6198 - (2.3780) - 2.4717 | | | 12.3087 - (9.4380) - 11.0015 | | | 1.8870 - (1.7928) - 1.8706 | | |
| CO2+C5 | 2.2396 - 2.2151 | 3.6733 - 3.6674 | | 5.5607 - 5.2309 | | | 1.4387 - (1.1764) - 1.2455 | | | 2.6005 - (2.1822) - 2.2803 | | | 11.9901 - (0.0000) - 9.3442 | | | 1.8021 - 1.7819 | | |
| CO2+C6 | 2.1552 - 2.1564 | 3.4868 - 3.5660 | | 5.0419 - 5.0408 | | | 1.4293 - (1.0772) - 1.1375 | | | 2.5881 - (2.0234) - 2.1007 | | | 11.7860 - (6.3067) - 7.8950 | | | 1.7669 - (1.6440) - 1.7302 | | |
| CO2+C7 | - | - | | - | | | - | | | - | | | - | | | - | | |
| CO2+C8 | - | - | | - | | | - | | | - | | | - | | | - | | |
| CO2+C9 | - | - | | - | | | - | | | - | | | - | | | - | | |
| CO2+C10 | - | - | | - | | | - | | | - | | | - | | | - | | |

+: calculations converged towards infinity
-: calculations failed

References

1. O. Kunz, W. Wagner, J. Chem. Eng. Data (2012) doi:10.1021/je300655b

2. R. Span, W. Wagner, Journal of Physical and Chemical Reference Data (1996) doi:10.1063/1.555991

3. E.W. Lemmon

4. U. Setzmann, W. Wagner, Journal of Physical and Chemical Reference Data (1991) doi:10.1063/1.555898

5. D. Bücker, W. Wagner, Journal of Physical and Chemical Reference Data (2006) doi:10.1063/1.1859286

6. E.W. Lemmon, M.O. McLinden, W. Wagner, J. Chem. Eng. Data (2009) doi:10.1021/je900217v

7. D. Bücker, W. Wagner, Journal of Physical and Chemical Reference Data (2006) doi:10.1063/1.1901687

8. Thol, M., Uhde, T., Lemmon, E.W., and Span, R. (2026)

9. Thol, M., Wang, Y., Lemmon, E. W., Span, R. (to be published, 2026)

10. Tenji, D., Thol, M., Lemmon, E. W., Span, R. (to be submitted 2026)

11. R. Beckmüller, R. Span, E.W. Lemmon, M. Thol, Journal of Physical and Chemical Reference Data (2022) doi:10.1063/5.0104661

12. E.W. Lemmon, R. Span, J. Chem. Eng. Data (2006) doi:10.1021/je050186n

13. T.S. Brown, V.G. Niesen, E.D. Sloan, A.J. Kidnay, Fluid Phase Equilibria (1989) doi:10.1016/0378-3812(89)80067-6

14. J.J.C. Hsu, N. Nagarajan, R.L. Robinson, J. Chem. Eng. Data (1985) doi:10.1021/je00042a036

15. R.H. Olds, H.H. Reamer, B.H. Sage, W.N. Lacey, Ind. Eng. Chem. (1949) doi:10.1021/ie50471a011

16. M.E. Pozo de Fernandez, J.A. Zollweg, W.B. Streett, J. Chem. Eng. Data (1989) doi:10.1021/JE00057A019

17. S.K. Shibata, S.I. Sandler, J. Chem. Eng. Data (1989) doi:10.1021/je00057a011

18. L.A. Weber, Cryogenics (1985) doi:10.1016/0011-2275(85)90019-0

19. D.-Y. Peng, D.B. Robinson, Ind. Eng. Chem. Fund. (1976) doi:10.1021/i160057a011

20. R. Span, W. Wagner, Int J Thermophys (1997) doi:10.1007/BF02575343

21. R. Span, R. Beckmueller, J. Buchenfeld, F. Fiedler, A. Jaeger, E. Mickoleit, T. Neumann, T.-T.-G. Nguyen, S.M. Pohl, S. Rath, F. Sabozin, B. Semrau, M. Thol, *TREND. Thermodynamic Reference and Engineering Data 6.0* (Lehrstuhl für Thermodynamik, Ruhr-Universität Bochum, Bochum, Germany, 2025)
